# Supplementary material for: Genome-Wide Transcription Start Site Mapping and Promoter Assignments to a Sigma Factor in the Human Enteropathogen Clostridioides difficile
Source: Front Microbiol. 2020 Aug 13;11:1939. doi: 10.3389/fmicb.2020.01939 (PMC7438776; doi:10.3389/fmicb.2020.01939)
Supplement: TABLE S2 — Complete list of TSS and predicted promoters for C. difficile 630 CDS genes. [file Table_2.xlsx]

## Sheet: genes
Table S2. Complete list of TSS and predicted promoters for C. difficile 630 CDS genes
Target Gene	Sens	Position of TSS	Score		function	Sigma factor	Score sigma	Nbr Bp +1 / ATG	100 bases upstream of +1	operon
CD630_00070	1	8527	3.27		conserved hypothetical protein	box-10?	1.73500915074	34	TAATGAAGACGAATGATGAAGTCAATGTAGTTTCGATTGCCAAAATAAATATTGAAGAAGAATAGGATAAATATCCTATTCTTTTTGTATAATGTAGTTA	CD0007-CD0011(sigB)
CD630_00120	1	16036	3.92		Putative small-molecule-binding protein	P-SigF*/. P-SigA ?	2.679/ 1.344	37	TGCCTGGGAGAGTAGGACGTAGCCACGTAGTCTTTTTTTATTTATTATAAAAGTTAAGATTAAATAGAATATAAAGTCAATATTGATTTATAATAAGATA	CD0012-CD0013
CD630_00140	1	17605	2.63	serS1	Seryl-tRNA synthetase 1	P-SigA	3.37788615071	347	ATAGAAAAAATGAATTTAATATAAAAAATTAAAGAAAATTCTAAAAAAATTTGAATAATAGTATTGAAAGATGTTAATATATATAATATAATGATTATCA
CD630_00170	1	22120	2.9		DNA binding protein	P-SigF/ P-SigA	3.202/ 2.394	46	GACATTGGTGAGGAAATATTAAAGAACATAGTGAGTGAAGAGATATTAGAAATAAAAGATAGTATTGATGAAAATGAGAGTAAATAATAAAATACTATTA	CD0017-recR
CD630_00181	1	23235	1		conserved hypothetical protein	P-SigA	3.10474314301	34	GGTTAATACCTCGATTTTTGTAGTTTTTTGAGTTAAATTCAAATTAATTTTGATTTAGATTTATTGAATAAATTTCTTCTGTATTGTATAATTTGTTGTA
CD630_00210	1	34835	2.43	pycA	Pyruvate carboxylase	P-SigA	2.1089396009	32	CAGTCTAAAAATTACTTATATTTATAAATTTATCTTATTAATTAAGGAACTTTCTTAAACATCTTCAAAAATAAAGTATTTTAGTCTATAATCTTTAATA
CD630_00220	1	38432	1.07	frr/ fusA1	Elongation factor G	P-SigH	4.03973874206	108	GTTTAATAAAAAATGTTTTAGAGTGTTTTTATTTATTTTAATTAAATATTTGTTAAAAAAAAGAGGACAATTACCTCCAGATGTAGAAATAAAGCTAGTA
CD630_00270	1	45511	2.01	radA	DNA repair protein	TGN-10	3.03952379513	30	AACAAAATTTTAAGGGCAATGAATCTATAATAATTCATTGTCCTTAATTATTTTATTTAATCTTTACATATTGTCTTTCAGATATGCTAAAATTATAGTA
CD630_00350	1	57403	4		Transcriptional regulator	P-SigA	3.54672640663	66	ACTATTTATGAAGGTGGTGGTACAAGAAAAGTATCACCTTTTTTTTGTTATACAAAAAAACAGTTGACTTTTTATATGAACCCCTTCTATAATGTTACTG	CD0035-CD0039
CD630_00470	1	71650	1.25	ispD		P-SigA?	1.46324505404	65	AAAAATCAATATATATTGTAATAAATATATGTGTTTTTCATTAGCAAATAGACATTAACTATTTATACAACTGAAAATTTAATATATAATTAATCAGATG	CD0047-CD0048
CD630_00490	1	72926	3.49	proS	Prolyl-tRNA synthetase	P-SigA	3.33633330618	351	GAAGGTCTTGGTTTTACAGGAGCAAAACAGGGAATAGCTTCACAAAGTATTTGTTTATTATTGTTGACAAGTCAGAATAATTAATATATTATTAGTAATA	CD0049-CD0050
CD630_00510	1	76968	5.15	gltX	Glutamyl-tRNA synthetase	P-SigA?	1.846	29	ATAATAAACATGTGTATTTTTAAATAAAAAGGATATTATTATTAGATTTGATTAAAAATAAACTTGCAAAACAATGTACTAGTTTAATATTATAGTTATA
CD630_00511	1	78588	1.92		conserved hypothetical protein			111	CCGCTAATTTAGAAGCGGACTTTTTTTGTGTTAGTATTTGGTGAAAATATCTGCTTAAGAAAATGAAGGTATTTAAGGTAATAAATTTAATATATAAAAA
CD630_00520	1	78951	1.88	cysS	Cysteinyl-tRNA synthetase	box -10?	0.491514953581	48	TAGAGGATGGTAATAGTATTATTATTATGTAGTTTGAAAGATAGTACGAAAAATGATAGTAATACTATTATTTATTGCAATTTTCAACTATAATATAATA	CD0052-CD0053
CD630_00540	1	80867	4	thyX	Thymidylate synthase thyX	box -10?	0.356550308477	33	ATCAAAATTATTGAAAGAGATATGTAAATATTAAAGAGTGTTGTCTTAATAATAAGTAATAAGGCAACACTTTTTTTATAACTAATGTATAATAAATATA	CD0054-CD0056
CD630_00570	1	82971	6.39	sigH	RNA polymerase factor sigma	P-SigA	2.48549147412	17	TTGGTTGGAGGAAAGGTTAGATAAAGAAACATTGTCGAAACTTGAGAACATTCGTAGAAAGCGTTGAAATTACTAGGTTCTTTAGACTATAATATACCTA
CD630_00580	1	83667	2.52	tuf1	Elongation factor EFTu/EF1A	P-SigA	3.0842607019	57	AAAGAGATGTAAAGTCAATAGATAACGCTTTACAAAGGGTTAAGAGAAAATTAGAAAAACATCTTGAAAACAGAAATGATTAATAGTAAAATACTTACCA
CD630_00610	1	85810	7.55	rplK	50S ribosomal protein L11	P-SigF*	2.83710984845	354	TGTTCCAACAGAAGAAGTAGTGGAAACTACTAAAACTGGAAAAGAAAAAACTAGACAACGTAAAGTTTATCCAAGTTATGTTTTGGTTAAAATGATAATA	CD0061-CD0062
CD630_00650	1	88833	2.98		Putative NADP-dependent deshydrogenase			68	AACTAAAATGTAAAATTTTACATTTTAGTTTAAAAAAATACACGAGTGTTTTATAAATAAAATGTAATAAATAATTAATTAACAAATATAAATTTTAAAA
CD630_00660	1	90106	16.11	rpoB	DNA-directed RNA polymerase subunit b	P-SigA	2.6638049541	54	TGCTTAAAATAATTTACAAAAAATCAAAAATAATGCATAGTTTACATATAAGATAAAAAATATATTGAAAAATACTTGACATTATGCTAAAATTATTAGA	rpoB-rpoC
CD630_00680	1	97461	3.11	rpsL	30S ribosomal protein S12	P-SigA	3.80898290102	231	AAGAAATATAGAAATATAGCTGTTGAAAAAATTGAAGATTAATAGCATATAGAGTAAAGAAATCTTGACAACCATTATTTGTGGTGTTAAAATAGTAAAG	CD0068-CD0089
CD630_00720	1	102330	2.61	rpsJ	30S ribosomal protein S10	P-SigA	3.47032055667	151	ACAATCAAGTTTAAGGTTATGATGTTGTAATAGAAAATAAAATTGAAAAAAACAGAAAAAAAACTTGAAAAAATGTAACAGATGATATAAAATATAATAG	CD0072-CD0089
CD630_00950	1	115370	3.03	rpsM	30S ribosomal protein S13	P-SigA		104	AAAGTAATGGTTATCTGTGAAAATCCAAAGCATAAGCAAAAGCAAGGATAAGAAATTATTACTAGCATTTTGTTAAATTTTATAGTATAATACTATATTG
CD630_01000	1	118395	1.52	cbiO1	ABC-transporter. cobalt-specific	TGN-10	2.95703644405	46	AAATGGCTTTTATAGAATTAGTATAGTAAGGAAAGGATTAGGCTTGATGGCTTAATCTTTTTTTTATTTTTTTGACTAAGGTATGATATAATAATGTGTA	CD0100-0102
CD630_01040	1	121725	10.98	rplM	50S ribosomal protein L13	P-SigA	3.51698773467	83	AGGTCAAGATGTGGACATACAGCTCCAGCACAAGGATTATTTCTCAAAAAAGTTCATTATTAACTTGACACACCAGGCTACATGTATTAAAATATATGAG	rplM-rpsI
CD630_01060	1	123155	2.66	cwlD	Germination-specific N-acetylmuramoyl-L-alanine amidase. Autolysin	P-SigE	0.926747781804	11	TATTAATACCAATAAATAAAGATGTATCAATATTAAAAAAATTTAAATGTTTGTACTAATATATGGAATATTATAGTGTTTTTATAAGTATACATATACA
CD630_01080	1	137899	19.39	nrdD	Anaerobic ribonucleoside triphosphate reductase	P-SigA	2.73406062223	121	CAAAGTTGTTAGAAACGCTACTGTTCAAAATATCCACATAGTATTTGCAATGATTTGCGCAAGTTTGACTATTATGTACAAATTTGGTAATCTTAATATA	nrdD-nrdG
CD630_01120	1	156205	1.59	ptb	phosphate butyryltransferase	TGN-10	1.62939585129	49	ATATGAAAAAAGACTGATAAATAGATTTAAATAAATATTTTGAATTAAATATTTCAATTATCTCTAGGAAAACGTTGCTGAACGAGTTATAATTTAATTG	CD0112-CD0118
CD630_01190	1	161679	3.81	glmM	Phosphoglucosamine mutase	P-SigA	3.097	91	TGTTCTAAAGCAACTAACTAATAAAGAAAAAGATGTCAAAAAAAAGACAATAGAATTATTTCTATTGTCTTTTTTGCTGATAAGTATTAAAATATTTTTA
CD630_01200	1	163369	1.93	glmS	Glucosamine-fructose-6-P aminotransferase	P-SigK/ box-10	2.616/ 1.440	14	GAAAGACTTCTTTAAATAATAGGAGCAATCCTATGGACAAAGGGAAGCCAAAGTAAACTTATATGACCTAACTCTTAAAATATATAAATAATATTTTTAG
CD630_01240	1	169491	11.3	spoIID	Stage II sporulation protein D	P-SigE	3.38038554109	31	AGATAACAGCTCTAGGTGGTCAAATCGAAATAGTAGAAGATTAATAATTGGTTTATAGAAGAAAGTTATAAATTAATAGGGTTGTTCATATACTTAAATA
CD630_01250	1	170627	19.44	spoIIQ	Stage II sporulation protein Q	P-SigF	5.19179287738	25	AATATTATGATATATTATCACATTACTACACAGATACAAAAATAAAAGATATATACTAATAATTGTATAAAATGCCAAAAACACGTCAATAATCCAAATG
CD630_01260	1	171391	44.64	spoIIID	Stage III sporulation protein D	P-SigE	3.330426738	27	CTATAGACCCAATGAGTCTAATTAAGTAATAGTATAACAAGTTTAATCATATTTGGTTAAGCTTGTTATATTTTTTGGTGTTTTTACATATATATCATTA
CD630_01270	1	171816	4.67	mreB1	Rod shape-determining protein MreB	P-SigA	2.21354377686	59	AAGAAATATATTAAGTAATTATAAATAGCAAAATAATAATACTCTCAAAAGATTTATTTTCTCTTGATTAAAGCGAGATTTTTGTATATGCTTTATTATA	CD0127-CD0128?
CD630_01290	-1	173974	4		conserved hypothetical protein	P-SigE	2.95589991092	16	ATTTTTTCTATTCCTTTTTTTGTAAGACAAATAAAATTTTCTATCTATCTGAAATTTAAAGTTAGGTCTTTTTAATGCTTTTTATTCATATATTTTTTTG
CD630_01300	1	174122	4	metK	S-adenosylmethionine synthetase	P-SigA	4.06789591933	265	CAGATAGATAGAAAATTTTATTTGTCTTACAAAAAAAGGAATAGAAAAAATATGACTAAAAATATTGACAAAATTTTAAAAAAATAGTAAGCTAGTAAAG
CD630_01340	1	180305	10.2		Transcription antiterminator	P-SigA	3.84033440513	288	AGGTTTTTGTATTGACTCTACTTACAAAAGCAAATGATAATTATATTATGGAATAATCTTATATATTGACAATTTTAGTTTAAAATATTAAAATGAATAA	CD0134-CD0138
CD630_01390	1	185284	1.62		N(4)-(b-N-acetylgluco-saminyl)-L-asparaginase			19	TGAAAGAAGAATTTTGTTATTAATAAGAGTATTAATTATTAGCAAGTTTAAATATTATACTATTTATAATAAGCATACATTAGTAAAATCTATATAATTT
CD630_01420	1	188510	3.98		Putative RNA-binding protein	P-SigA?/ P-SigF*	0.811/ 4.425	83	TGTTTGTAATAATATTAATCCACATAAGTATCAATGTAACTAAAAATGATAAATAATTCTATCAATTGAATAGAAAAAATCATAAAAGTAAATAATAAAA
CD630_01420	1	188546	3.56		Putative RNA-binding protein	P-SigH	4.47677047492	47	TAACTAAAAATGATAAATAATTCTATCAATTGAATAGAAAAAATCATAAAAGTAAATAATAAAAAGAGGATTATGAGAGTTCGTGTAGAATATATTATTA
CD630_01430	1	189244	1.32	secA1	Protein translocase subunit SecA1	TGN-10	2.72860480127	32	AGCAATTTAGATTTAATCATATTAGCTATCGATAAATAAATTATCGATAGCTTTTTAAATTAATATTAAAAGTATAGTTTTTATGGTAAAATGAATAATA
CD630_01470	1	196709	2.95		Putative transporter	P-SigA	3.2946979145	292	GAGATTCAAAGTAATGTACTCTACACTATAATAAATGGCAAAGTAGTGTATGAGAAAAAATAACTTGACAATTATTAAAAAATTAACTAATATAAGAGTG
CD630_01480	1	197815	4		Conserved hypothetical protein	P-SigH	3.89113422669	93	ATTTAGACAAATTTAAATTTTAAAATAAAGGAAGAATTAAAACGATTAACTATTAAAATATGAAAAAGGTATCTACAATATACAGAGCGAATTTATAATA
CD630_01560	1	206229	2.32		Putative membrane protein	P-SigK*/ box-10	2.88669372278	38	TTTAAATTACAGTTAGAGAATATATTACGTTTACTTCATTGAAGCAGAAGTTTTGTGGTAAAATACTACTATGAAAAAATTTAATAGAATATATTTTAGA
CD630_01560	1	206922	7.28		Putative membrane protein	P-SigK*	2.99466119557	-655	TTTATTTTATAATGATTGTTCCATCTGTTATTTTTGGGTTGATTCATATATGGAATCCTGATGTTACTTTTTTGTCTGTAATTAATATTATAATTATTGG
CD630_01590	1	209309	4		Putative enzyme. glyoxalase family	P-SigA ?	0.967992154041	131	ATAATAGTTTTATCAAAATTAATAAGAATACATATAGATTTAAACCTAAAAGTATGAACATGTCTGTTTTTTACAAGATTAAAATTTATATTATATGATA
CD630_01632	1	216643	1.44		Conserved hypothetical protein	P-SigA ?	1.34959994996	49	TAATAGAAAACTTTAATATAAAAATTCCAGAGGAAAAACTTTTGAATAGGCAATTTACGAGTTTTGATAATGTTCTAAAAATAATCAATATGGTATAGGT
CD630_01670	-1	223012	1.61		Transcriptional regulator. sigma-54-dependent	P-SigB/ Box -10	2.996/ 1.160	219	TATATAATTTATTTTAATATAATTCTATATTTACAAAATTATATTATCAATAGAATTTATTAAAATAAATTTTTTTGGGTGTATATTATAATTTAATCGA
CD630_01700	-1	227379	4		ABC-type transport system	P-SigA	2.86471294699	21	GTGTCCTCTTTTTTGTTTGATTCACAATAAAATATTTCTTTTTCAAAACTAATACATATAACCTTGATTATATTATATCAAAACATTATAATTTTAGATA	CD0170-CD0169
CD630_01710	1	227414	14.52	rex	Redox-sensing repressor Rex	TGN-10	3.28321387024	80	ATACCAAAACTTTTATTTAAGTTATTACATGACAAAACAATCATAAATTTCTACCTCCTTGAACTATCTAAAATTATAATGTTTTGATATAATATAATCA
CD630_01721	-1	229184	2.45	fdxA	Ferredoxin	TGN-10	3.02928471199	34	ACTTTATTGTAAAACTTTAAAACAAGAATATCATAATAAAGTTTTTGTTGTAGAATTAATTTAATTGTTATATTCAATAATATTTGTTATAATGTTATTG
CD630_01780	1	235776	4		Putative ATPase	TGN-10	2.93516729068	63	ATTTATTTTTTATAAAGAAATTTCATGTTGTAGTATATTTTTTGCTTATAAATTTTGGTACTGGATATAATATTAAACTGTTAATGATATAATAAATTTA
CD630_01790	1	236721	4.38	gluD	NAD-specific glutamate dehydrogenase	TGN-10	3.71872489731	71	AACATTCATAAAATTAAAAAAATAAACTTCCTCCAATGTTAAAAAATAAACTGAGAAAATGATATACTAATTTGCAATAAAGTGTGCTATAATTAAACTG
CD630_01830	1	241026	4		Putative cell wall hydrolase	P-SigA	2.47041723051	212	AAGCGCATAAAAAAACACATAAAACAATATTTATGCGCACTTTAACCTCGAATGGTACAAAATTCTTTACTTTTACAGACCCATATTATATAATTAAGTA
CD630_01880	1	245686	2.97		Putative ketopantoate reductase	TGN-10 ?	1.07668306633	300	GTGGAGAAGTTGTAGGTGTTGCATGTATAGCAGATAGAACTAATCATGATATAGGTATGCCTATATATAGTGCTATAAAACTTGATATTCAAGTTTATGA
CD630_01880	1	245949	4		Putative ketopantoate reductase	P-SigA	2.29269617297	37	TAAAAATAAAAAGCAGTTAGCCTTATAAATGAAGGTTAGCTGTTTTTTTTGTTAAAAATATATTTACAAAATAAGAGATAGTAGCAGTACAATATAAGTA
CD630_01890	-1	247885	4		Transcriptional regulator. LysR family			31	ATAACCATAAGTAAAATAAATATATAATATCGTAATGATTAATGTTTTTAATGGTTATTATATATAGTATAATTATCTGTAGAAAGTATATAAAAAATGT
CD630_01910	1	249293	2.5		Putative DNA glycosylase	TGN-10	2.96831475893	74	CATTTTTTATTTAAGGTAAAAATTTAAAGTAAAATATTATTTTACATAATAATAACCTTATAAATTTTGAAATTACTTATCTTTGTGTTAAAATAAGTAA	CD0191-CD0192
CD630_01910	1	249408	19.46		Putative DNA glycosylase	P-SigG*	2.12267541953	-41	GCTAAGTTTTTAAGTAAATAAACAAAATGAAAATATAAATATTAAGGAGATTTGGTATATGAATGTTTATGAAAAAGGTAATGGAGTTATACTAGAAGGA
CD630_01980	1	256503	3.78	guaA	Glutamine amidotransferase	TGN-10	2.37061013594	36	GTAATTTCACTTTTGCTAGAAATTATGGAAGTTACTATACAGGTTTTTTGTGTAAAAAGATTTAATATAATTTAGACTGTATTGTGTTAAAATAAATATA	CD0198-CD0198.1
CD630_02040	1	265878	4		Putative signaling protein	P-SigA	3.22267814078	74	TAATATAATTATTTAATAAAACCATTATCTATTGAATGTTAATGAAATGTTAAGATGGCATTCTTGAATATTAAGAAATAGAATACTATAATATAGTGTG
CD630_02100	1	273612	1.84		hydrolase. HAD super-family. subfamily IA	P-SigA ?	1.14	198	GTTTTATCTAATGAAATACTAGATATTGCAGGACATTATACATTTAATAATGATGATGTTAAAAAAGAAATAGAAGTGCTTTATGATAATTTAAGTAAGA
CD630_02180	1	281652	8.28	purE	Phosphoribosylaminoimidazole carboxylase catalytic subunit	P-SigA	2.59845037903	71	AGTTCGATACGTAGCGAATGAAAAAATTACAAGAAATATTTTTTTTAAAAAATTTCAAAAAAGAGTTGATAATATATGTATATTAATATAAAATTTAAGG	CD0218-CD0225
CD630_02260	1	292850	1.14	fla operon	Putative lytic transglycosylase	P-SigD	6.17950215146	152	AAGGAAAGTATTAATAAAAGGGTATGGTAGTCAATTAAAAAAATAATTAGTAAATAATTTTAGTATAAATATTTTTTTTATTTATCCGATAATCATAATG	CD0226-CD0240
CD630_02290	1	294568	1.96	flgM	Negative regulator of flagellin synthesis (Anti-SigD)	P-SigD	4.81430079879	28	ATTATTCTATATTGGTTTAATCAAGGGGTATTTTTATAAAAAATTTAAAATCTATTTGAATCGTATAAATATTTTTCTTCTTTGAGCGATAATTAAAATA
CD630_02390	1	300874	2	fliC	Flagellin C	P-SigD	5.24411499897	68	ACAGGTAAACACAATGTATTATAGTTCAAATAGAGAAAAAGTAAATATTTTTAATAAAAAAGTATAAAGTTATAGATTAACTTGTCCGATAATATAAACG
CD630_02410	1	304575	4		Phosphoserine phosphatase			191	ATTCGACATAAAACAGCAGTATTTGTAATAATTGAATTTTTATTAAGTCATTTTAATACTTAAAAACCATTTATAGAGTATTTTTGTTAGTTAAGAACGC	CD0241-CD0244
CD630_02450	1	308776	1.41	flgB	Flagellar basal-body rod protein FlgB	P-SigA	2.05396205456	496	ATTATAAAATTTAATATTAGAAATTAAATTAAAAAATTACATAAAAAAAATACTTAAAAAAATATTTAAAAAATTTGTTATTTATTGTATACTTAAGTTA	CD0241-CD0272
CD630_02610	1	321592	1.94	fliQ	Flagellar biosynthetic protein FliQ			30	ATGGGTATGTTTATGTTGCCTCCAGTCATGATATCATTACCATTTAAGTTATTATTATTTGTAATGGTGGATGGATGGAACTTGATAGTAAAAACATTGA
CD630_02690	1	329322	2.06	flgG	Flagellar basal body rod protein FlgG			503	ATAGGCGATATAAGTCCAGGTATTTCTATGGATGAAACTATCACAAATTTTAATCAAGGACCTATAAAAACTACTGATAATAAAATGGATGTAGCTATTC
CD630_02740	1	335650	2		Putative iron-containing alcohol dehydrogenase	P-SigA	3.08446824556	92	TTGGTTAATTTTAAATATTTAAGTAGGTTCTAATAAAAAACTCTATTTAGTTAAATATAGTTAACTTGATATATAATAAGATAATACATATAATTAAGTA
CD630_02750	1	337046	4	splB	Spore photoproduct (thymine dimer) lyase			53	AAAATTGTGTATAGAAGTTATATATATAATAAACTTGTCTTAAGCTTTTATTTTACTTTCTAATAAATAAAGGAGTTTAAAAAAGGGAAGATTAATTAAG
CD630_02760	1	338183	2.08		Transcriptional regulator. AraC family	P-SigA?	1.21730064436	120	GAGTATTTAAAAATAGTTTAATAAAATATATAATATAGCAAATCTTACCTAAAGATTTGCTATATTTTATTTTTATATATTTTATGTTTATAATAAAGCA	CD0276-CD0277
CD630_02780	-1	340218	4		Transcriptional regulator. hxlR family	P-SigA	2.26468796908	81	AATAAACTCCTGCCTTGTTCAAAAATTCTAATGCTTTCATAATTCTTACACCCCTTTTAAATACTTGTATTAAGGATTATCCTTTGATATAATTTTAATA
CD630_02790	1	340233	3.22		Conserved hypothetical protein	P-SigA?	0.816312361862	45	TCATTTTAATTACTCCTTAGTTATAGTAGTATCTTTTTTATACTTTATCAGAAAAAACTGCATACTTGTTTTTTCTGTATTTTATATTAAAATTATATCA
CD630_02791	1	341038	4		Conserved hypothetical protein	P-SigA	2.28027252425	38	TATTATGACTATAAAAAATTGCTACTTATTATTTGGATATTTTTATATATAAATAATAAGTAGCATGACTTTATACATTAATAATGATAGAATATAAATT
CD630_02920	1	352701	1.98		Transcriptional regulator. HTH-type	P-SigA?	1.413	353	TTGACTGCTTTTCTTTTATAGATTTTTATATAATAAACAAATACCAATACATGATAGTTGCCTGTTATAATTAGAGGAATAAATACGAATAATAACTTTA
CD630_02920	1	353040	4		Transcriptional regulator. HTH-type	P-SigB/ box-10	3.627/ 2.083	14	ATATACTTGTTTATTTGTTTCTCTGTGGTTGATTTTTTCGTCAAAAGTCAACTTCAAATCGCTTGTTAGCTTTACATGTTTAAGGATATAATTATACATA	CD0292-CD0294
CD630_02950	1	356246	8.79		iron-sulfur-binding protein	TGN-10	3.06460497077	27	AAATAATACAAATAATATTATTTGTATCAAATAAATATAAGAATATTTAATTATGTTAAAATATACTAAAAATTACTTTAAAAGTGATAAAATTAGTATA
CD630_02960	1	357380	6.05		Conserved hypothetical protein	P-SigF/ P-SigE	2.42/ 2.375	36	AGAATAATAGACTATGCATGTGAAATGGGTATGGGAAGTAAAGAATATGAATTAATAAAATTATAAGAATAGTAGCACTTAAATGCATATAATTATTGTA
CD630_03060	1	368521	4		Conserved hypothetical protein	box -10?	1.18296972621	58	TTATTTTTAACCCAACCTTCTAATTATTTTAAATTTAAGATACAATGATTAGAAGGAATTTTTTAAGTTTCTTAGAATACTGTAAATTATATAATCTTGA	CD0306-CD0308
CD630_03100	1	371365	1.14		Conserved hypothetical protein	box -10	2.45831543822	43	AGCTGCTATATTTTTCATAAGACCACCTCAATTAATCATTTCCTTATATTATATTATAAATTGTATCTAAGTTGTTAAAATATATGTATAATAATTTATA
CD630_03110	-1	373834	2.73		Conserved hypothetical protein	P-SigE?	1.299	53	CATTATATGTTATCATTTCTAAATTTGCAACAATAATTTTTATTAATTTAATATAAATAGAATGCACATATTATAAACTTTTTTAATATATATATTATTA
CD630_03140	1	382298	1.74		Putative membrane protein	P-SigE	2.90865106339	88	GTAGCCACGTAATCTTTTTTTATTTATTAAGTTTCTTATTTTAAGGTACTATTTTTAAAGTATGTTATAAATGCTTTGTGTAAATACATATAATAGTTTA	CD0314-CD0315
CD630_03210	-1	387966	4		Conserved hypothetical protein	P-SigA	2.55250873104	30	TTTAAGTAAAACCATGCACCATTTTATCACTACAAAATTAAGAGTACTACTTACTGATATTTCTTGATTTTGTTCGTCTATACGTATATAATATATGCTG	CD0321-CD0320
CD630_03220	1	388122	2.38		Putative ATPase	TGN-10	3.29878594839	66	TCTTAATTTTGTAGTGATAAAATGGTGCATGGTTTTACTTAAAATGGGGAGATTAAAAAATCAATTTTAGCTTATATCCTTTTATGCTAAAATGGTGATA	CD0322-CD0323
CD630_03240	1	391363	1.39		Cobalamin biosynthesis protein			21	GTATTAGATTGTGGAAAATTAGAAGCCTAACCATCGAGTTAGGCTTTTTTATTTTATTAAATAAATCAGACATGTATTATTATGTTTTAATTATTAGAA	CD0324-CD0327
CD630_03310	1	398563	1.11	ppiB	Peptidyl-prolyl cis-trans isomerase B	P-SigA	2.58437766481	42	ACTTTGATGATGAGTTTTGTAAAACTATTTATCAAGAAGGATATGAAATAGGAAAAAATATACTTGATAGACTTTAATTTAGAGTATAATATAATAAATA
CD630_03370	-1	411267	4		ABC-type transport system	P-SigA	2.98178100473	23	TTAAACTTGTAAAAATACAGATGAATTTGTACAATTAACTACTTAAAACTTGAAAATACTTACTTTGCTATATATTTTAGATAAATATATAATTGATTTA	CD0337-CD0335
CD630_03410	-1	418886	1.7		Conserved hypothetical protein	TGN-10	3.50794723707	57	TTTTATTGCTTTTTTAGACTTTAAGATAGCTTTTTTTCTATTTTTTGTAAAATAATTCCATAATTCACATTAATAATTCACAAAATGATATAATATAACA	CD0341-CD0340
CD630_03450	1	421123	3.65		Putative GTP pyrophosphokinase	TGN-10	2.66693488367	32	ATAAGTTACTTAGTTGATTTAGAAGAAATAGGGTATATATTGGAAAATGGAGAATTGCTTTACTATACAAAAACAAAATAAATTATGATAAAATAAAGAA
CD630_03470	1	422797	6.34		Conserved hypothetical protein	P-SigF	3.82378481523	36	AAATGGAGTAGAATATACATTAGCATCTTGTGACTATACAGAATTTAATTTAATAAAAGTTCACGATTAAAAAACATAAATTGGTAAATACTATAAGATA
CD630_03500	1	425054	4		Putative hydrolase. HAD superfamily	P-SigB/ TGN-10	2.664/ 2.315	89	TGGAGTGGAACCAACCTTAGAAAAACTTATATATTAGTTAAAAATGTAAAATTTACGAAAAGCTTGCTTAAATATGCAAGCTTTTTGGTATTATATAGGT	CD0350-CD0351
CD630_03500	1	425110	3.11		Putative hydrolase. HAD superfamily	TGN-10/ P-SigA	3.27251068447	33	GAAAAGCTTGCTTAAATATGCAAGCTTTTTGGTATTATATAGGTATAGTCATATCCAGAGTTTTGATTTATAATTAAAGCTGTGCTATAATATTTGATTA
CD630_03520	1	426352	4		Transcriptional regulator. RmlC-type	P-SigA	1.88498958914	99	ACCTTGTAAAAATATAGGTTACTAGTTTTTTATTTATTCATTTTCACAAAATTTCAGAAAACTATTTACATTCTAAAAAAAGTAATGTATATTAAACATA
CD630_03550	-1	430084	8.36	int	Integrase Tn916-like.	TGN-10/ P-SigA	3.45502940574	43	GTAATCGTATTCAGATTAAGCGAAAACAATTTGAAAAAATCATAGATACATTGGACGAAATCTAATGTCATTGAGCCGTAGATATGGTATAATAAATATA
CD630_03590	-1	431423	1.07		RNA polymerase sigma factor Tn916-like			42	AGACTATACGTTTTGTGCGGGCTTTTTTTATACTCGAAAAAAATTCAAAAATTTTTCAAAAGAGGTCATTAAATCACACCTAGCTGTCCTTATATGGTGCG	CD0359-CD0358
CD630_03700	-1	440547	4		Transcriptional regulator	P-SigA	2.8921	36	TATGAGCTTGTGCTACATAAAGATAGTAACTGGAAGATTGTAGGATAATCAAACTATTCATTTATTGACTTATTTTCTCTTGTGCGGTATATTTTTATCG	CD0370-CD0365
CD630_03730	-1	445859	4		Putative ATPase Tn916-like	P-SigF*	2.83799558066	1122	TGTAAAATCAGACTTTTTGGCAGGGCTTGGTTTTGGAGCGACACAGCAGTTAGGGGAAAATACGGGTATCTATATTGGCTATTCCGTCGATACTGGAAGA	CD0373-CD0371
CD630_03880	1	457261	2.35	bglF	PTS system. b-glucoside-IIABC component	P-SigA	3.56328443877	149	AATTGACATAAAAAATGAATTATAAAGGTACTATTAGTTAGTATCAGAAAATTTAAAAAAGTATTGACAATTCTTTTAGGCAAATGTTAATATAATAATA	CD0388-CD0390
CD630_03930	-1	465046	6.67		putative membrane protein	box-10?	1.3822058007	50	TTTTCTAATTATATACATTTGAATGGGTACAATCTGTATTTTACAAAAAAAACACCTAACAAACTATGAAAATTGTATGATTAATATTAATATATTTATA	CD0393-CD0392
CD630_03940	-1	466519	3.57	ldhA	D-lactate dehydrogenase	P-SigB	1.82452470889	163	CAAGTTAGTTAACTAATTTCAAACTTAGATAATTTTTTAATAATATTTAATCTAAAAAATAACAATTTCTTTGATAAATTTTAGAGTAATTATTACATTA
CD630_03940	-1	466624	4	ldhA	D-lactate dehydrogenase	P-SigA	2.132	268	TTATAAAAGTTTTTTTTATATATTTTTTTATGAAAAAGCTTGACATTTCAAAAAAAGTTTTCATTGCTAAACTCAAAAACACATGTTATCATTGTAATTA
CD630_03950	1	466875	1.41	hadA	Isocaprenoyl-CoA:2-hydroxy-isocaproate CoA-transferase	P-SigL	5.88717467006	158	AAAAAGATTATTCAATTGCATATTGTTAAAAAACATTCAAATCAAGCGATATTTTGATTAAATATAAAGTTGGCACGATAAATGCTTAACAATATAGGTG	CD0395-CD0401
CD630_04030	-1	477707	3.34	fba	Fructose-1.6-bisphosphate aldolase	box -10	2.29422641905	38	TTATTTAATCCTATTGTCTTCTATTTAACATTATACTTGTAATTTATAGTTATTACAATTTACTATATACTTTTTTTGATTTAACGTTATAATATAAGTG
CD630_04040	1	477785	4		Conserved hypothetical protein	P-SigA	2.9840577292	214	TAACTTTTAAAATTTACCCATCACTTATATTATAACGTTAAATCAAAAAAAGTATATAGTAAATTGTAATAACTATAAATTACAAGTATAATGTTAAATA	CD0404-CD0408.1?
CD630_04081	1	480531	1.86		Conjugative transposon protein Tn1549-like			66	GTGAAAATCCTGCATTTTAAGCAGTTTTACAAGCATTATGTATTTGTAGAAGATGGCGAAGGTGGACGAAAAAAAGTCCTAAAAAATTATATAGATGTGA
CD630_04110	1	482524	1.83		Conjugative transposon protein Tn1549-like			66	CACAATCCAAAATTGTAAGGATAGCGTAGAGTATCAAAGAATCTACTCAAGAATCATAGAGATGTGTATTCCTGTTATGGTTGTAGGAGAAGATTTTAGA
CD630_04230	1	496866	37.7		Putative DNA/RNA helicase Tn1549-like	P-SigH*	2.6989925002	-744	TCGGATATTAGTGGGAATATTATTGACGAAACCATTCAGAAAAGTAAAGAGCTTGATAAAGAGGTTTTAAGAGGTAAAGAAGCAGAATATAATAAGATTA
CD630_04260	-1	507492	1.25		Conjugative transposon protein Tn1549-like	P-SigA	3.44609267071	189	CATTCTATATATCAATTATTATTTATTTTATTCTATATTCTATATGTCAATAAGTCAAGTTTACTTGACTTATTATGATTTATATTATAAAATTAACTTA	CD0426-CD0425
CD630_04270	1	507568	1.45		Transcriptional regulator	P-SigA	3.86613624458	33	CTAAGCATATACTTAAAAATTTATAAGTTAATTTTATAATATAAATCATAATAAGTCAAGTAAACTTGACTTATTGACATATAGAATATAGAATAAAATA
CD630_04280	1	507839	4		Transcriptional regulator. AraC family	P-SigE*	2.34303559628	73	CAACAAAATTATCTCTTATAATCTGTGAGGTGTTAGAAAAACGAGTTGAAGATGTTTTTTATTTGTGTGAGATGATTGAAAAATAATTAGCATAAACTAA
CD630_04360	1	517978	4		Putative recombinase Tn1549-like			58	TTACTTTCAGAACATTTACTAAACGATATTGAATACAGAAAGATAAAGTTAAAACTAATGAAAAAGTATAACATTTTGACAGAATTATATTTATAATGTT
CD630_04380	1	520326	5.7		Conserved hypothetical protein	P-SigA	2.93657908411	27	ATATGCTAAAAGATTTATTTACAAATACAATTCATCAAATATTTACATTGTCGAATTTTAACGGTTTAAACATAATATATTGACTGATATAATAAAATCA
CD630_04390	1	521457	1.88		Conserved hypothetical protein	P-SigF*	2.20330950658	17	ATAAGAAGAAAAAACGTAAAAAGATATAGATGCTAGATATACCAATGATGGCAAGTGTATAACAAATATAATTTTAAGTATAAATATTTAAAATATAGA
CD630_04400	1	521818	4	cwp27	Putative cell wall binding protein	P-SigH	6.07576602187	30	TTTTTTAGTATATAGATTTAAAAAGTGACAAAATTTTGAAATATAAACTAATTTCATAAAGGAAAATATTCTTTTATGTAGAATTATAATATTTAAGTAA
CD630_04401	1	523185	8.14		Putative phage protein	TGN-10	3.02906828392	83	ATGTATTATTAAAAAGAAAATTATTAATTATAAAAAATAATAATAAAGACGATAAGTATTAAAATTTTATGTTTCCAATATTTATGATATAATTAATATG
CD630_04410	1	524297	1.79		Regulator. sigma-54-dependent	TGN-10	2.34418900817	60	CCATAATGAAAGATATATAAATAAAATTTTAAATATACTTAAAAATATATTAATATAATGTACATAAAAAATATCATAAATATATGATAAGATAAATACA
CD630_04420	1	525981	4.74	ord	2.4-diaminopentanoate dehydrogenase	P-SigL*	6.0752444286	32	TTTATGAAAATACATAATAAAATAATTATAGTTTCAACGTTCCAATAAATATTTACTTTAATTTTAAAGTTGGCACGATTTATGCTTTAACTAATTATTG	CD0442-CD0449?
CD630_04430	1	526584	4	ortA	2-amino-4-ketopentanoate thiolase a subunit	P-SigH*	2.41457233272	573	CTAGTATAAAAGCTAAGAGAGTAAATGATTTATCTCCATTTGGAAAGTCTGTTATGGTGGAACAAGGTGTTGGAGTAACAAGGGAAGAATTTATAAAAGG
CD630_04500	1	535191	2.68		Putative transcriptional regulator	box -10?	1.09440731192	520	CAGTATTATGTACTATGGTAACTTGTACAATTACCAATATAATAGCAGGTGAACAATATCTATCTATAGTTATACCAGGAAGAATGTATAATAAGGAATA
CD630_04650	1	554070	4		Transcriptional regulator. RpiR family	P-SigA	2.22726205626	14	TTTTTATTTTAATAAAAATAAAATCAAATGATTATTTTATCCTTATTATTTAAAACTCTTCCCTAGAAAAAGCAACTAATGTATATTAAAATAATATTTA	CD0465-CD0466
CD630_04670	1	555676	4		hydrolase. HAD superfamily. subfamily IIB	P-SigA	2.6643150777	23	CATATTCCCCGAAAATGAAAATTTGTGCTAAAAATGAACATATTTTTTAAAAGATATCAAAATATTGATATCTTTTTTTTTGAATGCTATTATGATTTTG	CD0467-CD0469
CD630_04730	1	563076	3.35		Transcriptional regulator. MarR family	TGN-10	3.5764037234	460	TAAATCCATCATATTGTATTGGTTGTTTAAATTGTTATAAAATGGGCAAGTGTATCAATCAAAATGATAAAGTAGAGTATATTCATGATATAATTACTAA
CD630_04810	1	569423	4.41	spaR	Two-component response regulator	P-SigF*	2.50920619844	53	CTAGTATAGAGCTTATAGTAGTAGCAATAGGTTTGATTATATTCTTGATAGGAGGCGTTATTTGGTTTAAAATGTGGGAGGGAAGGAAAAGTTATTAGTA	CD0481-CD0482
CD630_04880	1	578822	1.28		small multidrug resistance SugE-like protein	P-SigA	2.78106854855		TAAGTTTATAATTCGTAAATAGGCTTACATTTTTATATTTTTTCTTTGTTTTTTAATTTTTTAGTTGACAAAACATAAAAACTTATATTAATATTATTAA
CD630_04890	-1	580244	1.09		Putative phosphoribosyl aminoimidazole-succinocarboxamide synthetase	P-SigA	3.0868175722	93	TAGTTCTCTTATTATAAGTTTTATAAAATGTACTTTTTTTGTTATTTTTATAAAATTGTTCGGAAATTTCCCTTCTATTTGTGATATAATATTAAATATA
CD630_04900	1	580497	8.21		Putative sugar-phosphate dehydrogenase	P-SigL*	5.89930829212	50	CTTTTGACACACTTTGACACACATTTAATGATAATTTTATAAAATGCATGAATACAATGCTTACATATATTGGCATGAAAGTTGCTTTAGATATTTAACA	CD0490-CD0494
CD630_04960	1	585615	2.48		conjugative transposon protein DUF961 family Tn5397			80	TGTATATGGAGCAAGACGCTTACTAATTCCATTATGGGAAATAGGAGCGTCTATTTTTTTACCCAATTTTGAAAGGACGTGATACCACGAAAGCAAAAAA	CD0498-CD0499.1
CD630_05071	1	599850	7.14		pseudogene upstream tetM			115	TTTTAGTACATGGTTATAGCTATTTTGTAACCACGTTCTCCTTTGACAAAAAATCGGATATATCTTTACAAATATACTCTTATGTGCTAATGTTAATATA	CD0507.1-CD0508
CD630_05090	-1	602669	4.95		Transcriptional regulator. HTH-type Tn5397			14	GAGTAGTGCTTTTAAGAATGTAATTTAATAGGAACTGAAAAACTATTTAACACGTTTTTCTATACCTGTTTCAAATTCAACAGGAACAGTAAAATGTATA
CD630_05100	1	603101	4		Putative RNA polymerase sigma factor Tn5397			56	TCAATCTGTCTATGTGCTTTTTTTGTATCTCTGGATATTTTTTAATGTTTTTTCAATTCTTAATGCAACAAATCGCCCTTTCACATTGGGAGTAAGAGTG	CD0510-CD0510.1
CD630_05110	1	604293	1.5	tndX	Recombinase site-specific resolvase family Tn5397			134	AAGAGAATAGTCAAAATAAAACTATGTGTATTGATAATACAAAATTTTATGTGATTTCAAAATTTATAGGAGCTGTAACACTTCAACATCTTATAAAGAG
CD630_05140	1	607231		cwpV	cell surface protein	P-SigA	2.10614679693	330	TTTGAATTAAAATGTAAATATAAAGAATAATTAAAAAAATATCGCAATTATTTGTTTTTCATATGGATAAAATTGGTTATTTAATATATAATTACAAGTA
CD630_05160	-1	617090	2		Transcription antiterminator	box -10?	1.48328938718	45	TAACACCATCTATTACACAAAACAACATATTAAAAAGTAAAATACAAAATATCCACTATAAACCTTATTTTAATACTGAATATATATTATAATATATTTA
CD630_05170	1	617657	4		Putative membrane protein	P-SigA ?	2.79919021232	90	GTGTTTGTCAAATATTAATTCAGCCATTTTATGGTGTAAACAAGCTTAAAATTTGATTTTGACAAGCATAAAAAACAAGTTTTTTCATAAAATGTAAATA	CD0517-CD0518
CD630_05190	1	619045	2.75		Conserved hypothetical protein	P-SigA	3.79553952589	184	GATAAAAGAAAATGAAAAATATAAAAAGAGTATAAATAAAATTAAACAACAAAAATAGAAAAAATTGACTTTTAAACAAAAGGATGATAATATAATAACA
CD630_05250	-1	631715	7.56		pseudogene. aminobenzoyl-glutamate transport protein	P-SigA	4.34613686006	106	GTCATTAATCTACTTAAAGCATATTTAACTAACACCACTCAACCAGAAAATTCAGAAAACTGCATTGACACAGGAAAAAGTTTATTTTATACTTTTTTTA
CD630_05300	-1	635713	6.49		Putative membrane protein	P-SigA	3.96734000199	136	AATTTTTTCATAATAAAGCTATATTACAATATATTCAAAATATGTAATATTTTAGATATTTTTCGTTGACAATGTTAAATTTTTGTTTTATCCTTAATTA	CD0530-CD0528
CD630_05320	1	637536	4		Putative transcriptional regulator	P-SigA?	1.72593124171	51	TTAAATATATAATATCTTGCATTTAGTATATAATATCTCACTGAGTTTAATTATATTAAAAATATGACATAAAGGTGTCGTATATTATAAATTATAATTG
CD630_05330	1	638654	4	cheY	Chemotaxis protein CheY	P-SigA	3.16846558421	174	TTTTATTATAATTTAATTACTTTTGATAACTTTTTATGTTTTATACAATTATATTTTTAATAACTCGTCAAAACGCCAAACATATATTACAATAGATATA	CD0533-CD0536
CD630_05430	1	647568	6.48		Conserved hypothetical protein	P-SigA?	1.25870607525	520	ACCAAAATCAACACCAGGGATTGTTGTAGTTCAACATATGCCAGCTATATTTACTTATATGTATGCACAACGGCTTGACAAGCAGTGTATTATGAATGTA
CD630_05430	1	648057	4		Conserved hypothetical protein	P-SigG	1.49832990596	31	TAATATTTTAAAACAAAAAGATTAATTTTTTATAAATAAAAATTAATCTTTTATTAAATTATATGGATAAAAAACCCTAGAAACTCCAAATATAATAAGA
CD630_05440	1	648987	2.28		Putative ornithine cyclodeaminase	TGN-10	3.40643324087	31	AAATAAAGCGTTGATAAGTTCTATGCTAAAACCAGAGTATGTAGATTTATTTGATTTGAAATAGAAGATTAAATTAAATGTTATGCTATAATATTTAGCA
CD630_05450	1	650058	1.34		Conserved hypothetical protein	TGN-10	2.97729396496	41	ATACGATAAAGCAAAAGAAAACGGTATTGGAATAGACTGGAAGTGGTAAAATATTCAAAATAATTCTATAGTTAGACAAATTTATGTTATAATGTTGATA
CD630_05460	1	651108	1.54		Putative membrane protein. DUF975 family	TGN-10?	1.85962313474	63	TGTTGACTATATAAAACTAGTAATACAATTATGGCATATCTTGATAAAACATGGTGAATAATTGTATCTTATATAGTCGAAAATATGATATATTAATATT
CD630_05460	1	651151	1.91		Putative membrane protein. DUF975 family			18	TAAAACATGGTGAATAATTGTATCTTATATAGTCGAAAATATGATATATTAATATTATACGTTAAAAGATTATTTATATTTTTAAAAGTTTTTTTATAA
CD630_05470	1	652110	3.32		Transcriptional regulator. b-lactams repressor	P-SigA	3.03940984765	45	GATAAAACTGTCTTTTATAAGAATTTTTTAAAAAGACAGTTTTTATTATTAAAAAATAAATGATTGACATAGTATAGACTACTATGATAGTTTTTTATTA	CD0547-CD0548
CD630_05500	1	655705	4		Putative membrane protein	P-SigH*	2.21516310581	100	AGTAATCGTAAAATAAATATATAGATAATGGTGGATAGAGTAGTAAGAAAATAAATAGATAAAGGGATAGAATAAATTTAAATATGGAAAATGAATATCT
CD630_05510	-1	658278	3.55	sleC	Spore cortex-lytic enzyme pre-pro-form	P-SigK	2.44403861224	38	TTAAATTATTTAAATACAAATATACTCAAATACTCAAAAAAATTTAAATTTATATCTATATTATTTAACAAATTTCAAGCTATATTCATATCTTGAAATA
CD630_05540	1	660621	2.94	sip2	Signal peptidase type I	P-SigA?	1.78083339499	69	GTTGGGGAAAAGAATCTTCTGGTGTAATTAAGAATCATTATCCTAAAGGTCTTAGAAAAGTATTTTAAACTATTAGAAAAAAGAAGTATAATATTTATA	CD0554-CD0556?
CD630_05570	1	662410	23.77		Putative uridine kinase	P-SigE	2.08731956687	357	TAAATACAAATTCATATGTATGTATAGAGAATACTTATTCAAAAGGTGGGGATTTTTCAAATATTGGAAATATATCTTATGATTTTGAATATATATTTAA
CD630_05580	1	664932	1.33	glsA	Glutaminase	TGN-10	3.51980473853	27	AATTGTTTGAAAAATGAATTGATTCTTGTAGAAAATAATTTTAAAGTATAATTTTTTTTAACATTGTTTTATTATAGTATAAACTTGTGCTAAAATAGAA
CD630_05590	1	665945	2.42		Transcriptional regulator. ArsR family	P-SigA	4.01779535945	41	TTTAGAGGAGTTGTCAAATAAACTCAAATTAAATATTTTTTAAAATATTAAGAAAGGATTTTTTTGACAACAACATATAATTTAATATATAATTAAATTG
CD630_05610	1	668122	1.15		Putative aldo/keto reductase	P-SigA	2.3275082834	50	GATTATATTATGAATAGATTGATATAAAATATAATTATATTATGAATAGTATGTAAATATATTGCAAAGATTCTCATAATTTGTTGTATAATTAAAGGTG
CD630_05620	-1	669848	4		Putative RusA-like endodeoxyribonuclease	P-SigA	2.96604635074	20	ATTACTACATCTAAAGTGGAAAATTTTACAAACAAGCTCTGTAAAAACACTTTAAATAACAATTTGCTTTTAAATCATATACAGATTATAATAAATACTG
CD630_05640	1	671798	5.24		Putative ATP-dependent protease	P-SigK	2.7325191222	77	CTTTTAGCTGGAGAGGGAGAAATATAATAAAGAGAAATATGGAAATAATTTTAGATAAGTATGATGACTAATAATAAGAGTCTGTTTCATATACTTTAAT
CD630_05690	1	676965	4.72		Putative lipoprotein	P-SigA ?	1.2824679891	452	TGGTCCTGGTGTTACTGGTATCATATGCTTAAAAAATAAATAATATATTTTTGGATGACATTATTTATTTTTTTATTAAATTAGGATAGAATATTAATTA
CD630_05700	1	678489	3.04		Putative lipoprotein	TGN-10	3.50016370053	58	TGTTAGAATATGTTAATAAGAACAATAAATAATCTACTATAATATCCAAGAATACTTATGACTTTAGTTATGAGGTGAATTGGATGTTATAATAGACATA
CD630_05720	1	680204	8.87		Putative sporulation protein	P-SigG*	2.00530203695	642	TATACTAGATGACGATTTGTGTCTAGCTTTGGTGGACAAAAGAATTAGTTATCTAATGGAAAATGAATTAAAATTAAGAAATATAGAGATAATAAAAACA
CD630_05720	1	680599	2.76		Putative sporulation protein	P-SigH	3.53793882549	247	AGCAGGGCTATTCTAAATGCTCAATCTGTATAGTAGATAGAACGTCTATAATAACATCAGATAAAGGTATTTGGAAAAGTATGAAGAATACAGAAATAGA
CD630_05730	1	681715	4		Putative membrane protein	P-SigH	1.68607864706	129	TGTAGAAGCAATTTTTGAAAATAAAGTTAGTATAATTATGGAAAACTAGAATCTAAGCATATAAAAGCTATCCATATAAAATTAAAAAAATTCTTTTTAA
CD630_05740	1	683150	4.97	thrS	Threonyl-tRNA synthetase	P-SigA	2.61359689742	312	TAAGAATATTGGTTTACAGCTGATTGAGATGAAAAATAATGGGTAATTAATATATTACATTAATGTTGATTGATGTATAACTATCTGTTATAATGAAAAT
CD630_05760	1	687782	7.33		Putative ATP-binding domain protein	TGN-10	3.32963511946	128	TATTTTATACCTAGTTATAGATAAATTTATATAGTTATTATTAAAAAAAGCAATAAAAAGTTTAATTCAATTTAGCAAATTTAGTGATATAATTAAAAAA
CD630_05770	-1	690583	2		Conserved hypothetical protein	P-SigA	3.96061392482	51	TTTAGATATAAAGATTTAATTTTCTCTAATTTCTGAATTTAAATGCAAAATTGTGTATCAGTATGTTGACGTTTTAGAAATTGATTGATATAATCAATGG
CD630_05800	1	693165	3.68	gapN	Glyceraldehyde-3-phosphate dehydrogenase	P-SigB	4.38729473974	33	GAAGAATGTAGAAAAACGTTAACTTAAAATTTTTTTATAGGTAAACGTTTATGAAAAAAAGAAATGTTTACATAACGAATAAATGGCTATAATTTAAATA
CD630_05840	-1	702105	4		Diguanylate kinase signaling protein	P-SigA	2.67269510939	871	TTCGATAAATTAGATTTATTGTTTTTGTAAGGTATATTTACTTTTATTTAATAGGGCAAAATAGTTGCTTATTTTTTCCTCATAATCTATAATTAATATA	CD0584-CD0583
CD630_05860	1	703907	1.43		Conserved hypothetical protein	P-SigA	3.72475708312	68	AGTGTAAGTAAACAGACAAGGTTACGAACAGTAACATGAAGTTATGAAATTAAATAAGCTGTTTGACATTTTTACGTGCTCATATTAGAATTAAAAAAAT
CD630_05870	1	704760	4.59		Conserved hypothetical protein	P-SigA	2.2747958591	32	TAAGTTATTTTATAAGTATTTTTATCCAGTTATGCATTTTCATTGACCAGTTACACAGAGAATATTGAATATTGAGAAAATTAGTACTACTATATATATA	CD0587-CD0588
CD630_05930	-1	718178	3.84		Conserved hypothetical protein	box -10?	1.84053814508	87	CATTATTTTACATTTTTTTCCAATATATATAAATATCATATTTTTCTATTAGCTAAAACTAATTACTTTATATTTCTACGTATTAGTATAATAATACATA
CD630_05940	1	718292	1.65		Conserved hypothetical protein	TGN-10	2.60987631545	154	TAATACGTAGAAATATAAAGTAATTAGTTTTAGCTAATAGAAAAATATGATATTTATATATATTGGAAAAAAATGTAAAATAATGATAAAATATAGTTTA	CD594-CD0595
CD630_05950	1	718714	1.06		Putative nuclease. ParB-like			1063	AAATAGGAGTATTTCATCAAGATTTTGAGGCTCAATATAGTTTGACTACTGAATATGTTGAAAAAGTATTTGAAGATAATATTGAAGATATTGAACCATA	CD594-CD0595
CD630_06010	1	723194	4	ogt1	Methylated-DNA-[protein]-cysteine S-methyltransferase 1	P-SigA?	1.07435693534	297	ATTCTATTTACTAACGATTTTACTGGATTTCTAACATAAAAATACTTTTCTTTTTTACAGCCTATTCTTACTTTTCCCATTTGAAAGTATTATGATATTA
CD630_06010	1	723244	4	ogt1	Methylated-DNA-[protein]-cysteine S-methyltransferase 1	TGN-10	2.42492234686	247	TTTTTTACAGCCTATTCTTACTTTTCCCATTTGAAAGTATTATGATATTACTTGATGTTATATCGATATTTTTTTGGTCTATTTAGTGATAAAATTATAA
CD630_06011	1	724125	4		Conserved hypothetical protein	PSigA	2.20120323103	125	GCCATTAAATTTAGAAATTCTTAATCATTTATTTGATATACAAACATCTAATTTTGAAAGCAATAACTTGCAATTTTAAAAAATGATTATTTAAACTATA
CD630_06020	-1	725650	20		Conserved hypothetical protein	TGN-10	3.10882087532	365	TTTAACCATGTTTTGAATAGCAGATAATTATATGATTAAAAATTAAATATGACATAGCGTTTGTGGAATATAACACCTAAATTATGTTATAATAATAAAA
CD630_06040	1	726052	4.18		Conserved hypothetical protein	TGN-10	3.14701173856	47	CTCTTTTTATTCTTAGTTTTAAACTTTCATATTTCCTTGAAAATTTATTGGCAATGAAAGTGCATGAATTTTTTAGCTATTTTTTATGTTACAATATGAA	CD0604-CD0605
CD630_06080	-1	730930	8.98		Conserved hypothetical protein	TGN-10	3.80038830439	43	AAACTACAACATCTTTATGAGAATTAAAAAATGATAGACTATGTTATCAACATTAAGAAACAGATAGAAAAGAAACAGAGTATGTGCTAAAATGGGAACA
CD630_06160	-1	741075	3.92		Transcriptional regulator. MerR family	P-SigA	2.86933227648	24	AAATATAATTTACTCTCTATAATTTATTGCAACATCTGGAAAATAATTGTATTTCCACAAACGCTTGAAGTATATAAAAACAAAATATATACTGATTATA
CD630_06250	1	745735	4		Putative phage protein			76	ATATGACATAATATATTTATAAAATTAAGAATATAAATAGATATTTTAAGGTATTAGTTGTTAAATTAGGAAATATTAAAAAAATATATATATTTATATT
CD630_06270	1	749185	1.61		Transcriptional activator Mor			305	CTTTAGATTTTAATATACCTGTAATCCAATTAAGTCAGTTAAATGATGAAATGAAAGATTCAAGACCTTATGGAGATAGACCTATGAGGGATAGCAAAGC
CD630_06270	1	749236	3.15		Transcriptional activator Mor	P-SigE*	2.02403466425	254	TGAAAGATTCAAGACCTTATGGAGATAGACCTATGAGGGATAGCAAAGCCATCTACCACGATAGCAACAATGTGGTTTATATACATCAATTAAAGGGGAG
CD630_06290	-1	753466	8.03		Transcriptional regulator. Crp family	P-SigE	1.90584643004	93	TTAGTTATACAAACCTACTATCATCAAAACATATTACTTTCTCATTAATAGCAAGAATATATATTATCATATTTTTTCTACATAAATCATACTATTACTA
CD630_06330	1	755989	4		Conserved hypothetical protein	box -10	2.26670254849	193	AGAGCAAGAGCAAGAGCAAGAGCAAGAGCAAGAGCAAGAGCAAGAGCAAGAGCAAGAGCAATCAGTAAAGTATAAAATTCTATTACTATAATAAAAGATA
CD630_06340	1	757554	2.05		Conserved hypothetical protein	P-SigA	3.18465343623	31	TAGTAAATCCATAGAATCACAATTAGAAGATGAAGTGTAAAAAATAAGTTAGTGTTGATTTTAGTTGCTAGTGATATTGAATAGTTATACAATAGCCATA
CD630_06390	1	761759	4		Conserved hypothetical protein	P-SigB	3.048	11	TAGTAATGATATATAAGTTTATAAGGTTCTTATTTCAATAATGCAAATTTTACTTAGAAGTTCAGACTTTGGTATGAAGAAATGGGTAATAATAAAAAAG
CD630_06410	1	763628	2.13		Putative membrane protein	P-SigA	2.05273950105	42	CATCTAAAGTGCCTCTATCTAATGTAAAATTAATAAAAGAATTTGTTGCAAAATAATATTTTTATTGAAATTTATTCAAAAAAGTTATATATTTATAACA	CD0641-CD0642
CD630_06421	1	764954	3.13		Conserved hypothetical protein	P-SigA	2.27638239772	158	GCCAGAAAATGAATAGTTTAATAGATTAAAAAATACATATTTGTGAATTATAGAATGAATAACTCCATAAACTAGAAAATTTATAATAATATCTATATGA
CD630_06421	1	765055	1.73		Conserved hypothetical protein			57	AATTAGAATTATTTTATCACAAAAAAATTAAGTTAAATAAATATGAAATTACTTCCAAATATACTTCCAAAAACATGTAATCGCATATATAATATAATTA
CD630_06430	1	765788	1.15		two component system	P-SigA	3.66110631418	27	AAAGAACTTTAACTTAGAAGAGTATCACCAAATTGCAGATACAATATCATAAGCAGTTATTTATTGACAACCCTTTTTAATAAATATATCATTTGAAGTA	CD0643-CD0644
CD630_06480	1	770394	4		Transcriptional regulator. GntR family	P-SigA ?	1.31413997157	111	AATTTGAAGTATAACGATTTAATCTATAGTACAATAACTTGATTTGCAATACAATGAATTAATCTATAGTATAAGAGCATGATTTACAGTACAATAATTT
CD630_06520	1	777914	1		Transcriptional regulator. GntR family	P-SigA	3.90002850774	44	ATCAAAAACCTCTAATATTTCATTCATATTTATTTTGTCATAGTAATATTTTACATCTTTTATATTGACAAAAAAGTGCTCTAAGTGTATAGTGTGTATA	CD0652-CD0654
CD630_06560	1	782546	4		Chloride ion channel protein			10	GTCATTACATTGACTACAGTTGATGCAATAAAACTTTCAAAAAATCTTATGATGCAAATAGAAAGGAATTAAAATGATAGAAAAATTTAAAACTTTAATA
CD630_06570	1	783820	2.17	cdu2	Na(+)/H(+) antiporter			19	TATTTAATATGGATAAATCTATTTATTCACTACAAAAAATTTCAACAAAACAATAAATAAAACAACATAATGTATGATTAGAAGAGAAAGAATATTAGAG
CD630_06580	1	785205	4	cdu1	Transcriptional regulator. beta-lactams repressor	P-SigA	1.45983789833	28	CATTTGGGAGATTAAGAAGGTAGAAGTTAAGAACAGATTTTAAGGTATGTTATGATTATTAGAATTGATTTTGTGAAATTATTATTGTAATATTTAATTA
CD630_06590	1	786444	1	tcdR	Alternative RNA polymerase sigma factor	P-SigD	5.47518599147	77	TTATTTATTAGAAAAAGATTACTAATTAATTATTAAAATTAATGTATTCATAATGCATATTTTCATATAAAATTTAATTTATTTGCCGATTATATAATTA
CD630_06620	1	795160	4		Conserved hypothetical protein			64	AGCAATTTTACTAGATGCAATGACAGATGAAATGAATGCTAAGGATGAAAAGTAAGTAATGGTAGATATAATAAAGATATTAACAAATAAAAAGTGTTAT
CD630_06640	-1	805066	4	tcdC	Negative regulator of toxin gene expression			58	TTTCAAAATATATTGAATCTTCTTACTTTATTTTGTAAAATTATGCTTAGGGGAAATATATTTTAGGAAAATATGAATATATAATTTTTAGTCAACTAGT
CD630_06641	1	805414	2.01	cdd1	Conserved hypothetical protein	box -10	2.45803004895	20	ATGAAAGAGCATAAATAAATTGATATAATAAAAAATTAAATATTAAATATTAACTATAATAAAAAAATATCTGGTAATAGGTATAATATAAAAAGAATAT
CD630_06642	-1	806329	4		Conserved hypothetical protein			163	TTTAAACTAATCTATAGTCTTGTAGAATATTCAAAGAGATTTAAAGCAATCTATAATGCTGTAAAATATATTCAAAGGGATTTGAAGTAATTTATTGTGT
CD630_06680	1	809535	4		two component system	P-SigA	3.5866078988	98	TGAAAGTCTTTGTGTTCTAATTATCATTTCCATATGTTTCATCCCCTTTTTTAATCTGTGCTTATTGATTCTTTTAACTTATATCAGTATAATAACTTGG	CD0668-CD0669
CD630_06680	1	809622	2.53		two component system	P-SigB	3.5866078988	11	TATAATAACTTGGTTACATTTCAATTAGCTGAAATTTACCTTACAATAACCTTAAAAGTCTATTTAGGCAAAGTTGTGAAAATGGGTATATGGTATACTA
CD630_06730	1	817171	4		Putative methyltransferase	box-10	1.63141614503	195	GATTGCTGTGGAGTAGATAAAATTACTCACTAAAATAATTATCATAGAGTAGATAAGATACTCATTAAGGTGATTATTGTAGAGTAGATAAAATTACCCA
CD630_06770	-1	820705	4	csfT	ECF sigma factors	box-10	1.34734486734	57	TATATTATAGAATATTTGTATAGAATAGGCAAAACTTTCAAACTTAAATTTATCAAATAATCATAAAAAAAGTGAACCATCTATAGTAAAATTTTATCTA	CD0677-CD0676
CD630_06790	1	821282	8.28		Conserved hypothetical protein			364	TTATCAAATTGCTACAGAGATAGGGTTAAGTACTAATACTGTATATAAAGTGTATATAAAGTGTTCAATAAAATAATAAATAGTGGAAAAACTAAATTTA	CD0679-CD0680
CD630_06810	1	824184	4		Transporter. Major Facilitator Superfamily			78	ATTAAAACAAATGTATATGGGAGTAGAAGAATAAAGCTGTTTAGAGTATAAATAGTTTTGAAATGTATATAGGGAAGTATTGCTTTATAAAATTTAAGTG	CD0681-CD0683
CD630_06840	-1	830199	4.12		ATP-dependent peptidase. M41 family	P-SigF/ P-SigG	3.42/ 3.235	57	TCTCTATATACATAAATTCATTTTTTCATACATCTTACAAATTTATTTTTATTTAGATAACATGTATATTTTTTCCATGAAAAATAAATAATAAAAAATA
CD630_06850	1	831057	1.56	infC	Translation initiation factor IF-3	P-SigA	2.73874721782	172	AGTAGTATAGACATATAATTAGTAGTAGGAAGTAATTAAATTTTTCCTAAACAAAAAAAATAGTTGCAAATAATTTGATTAAGTGATATAGTAAATAAGG	CD0685-CD0887
CD630_06880	1	832652	2.05		Conserved hypothetical protein	TGN-10 ?	1.49814655494	44	TAAAAAGTCATAGTAAAAATGATATTGATGTATGTTGATATATGTATAAAGCTTTCAATCAATCTTGAATTAATATTATCAACATGATAATATTATCTTA
CD630_06890	1	833650	2.67		Putative nucleotide phosphodiesterase	P-SigA	3.94313640385	52	TCATCTATTAGTTATTGTTAGCATATTGAAAGAAATTATAGTAATCTATTGAATAAATGAATATTGCCCATAATCATATAAACTGCTATAGTTTAAAATA
CD630_06900	1	835953	2.63		Putative nucleotide phosphodiesterase	box-10	2.16211185444	75	ATTAGAGTAAGTATTATTTTACCAGTAAAAAATATTGAGAACTATATGTAGATTTGCTTAAAAAGGAATTTACATATAGTTCTTTTCGTATAATAAATAG
CD630_06910	1	838704	4		Short chain dehydrogenase/reductase. SDR family			72	ACCGATTCTATAATATTAACATTATTTTTTATGCTATATAACAATTATTGAAAATGATATAAGTATAATATCTCAAATGATATGAATATAACATCTGAAT
CD630_06910	1	838736	1.72		Short chain dehydrogenase/reductase. SDR family	P-SigF*	4.07287588802	40	GCTATATAACAATTATTGAAAATGATATAAGTATAATATCTCAAATGATATGAATATAACATCTGAATAGAGGGTGTTTTATTTGTAAAAAATAAGTTTA
CD630_06920	-1	840764	1.39		Metallo-hydrolase/oxidoreductase	TGN-10	3.08021389928	78	TCAGTTCATATACAAAGTCAGTTTCATTGATAAATATTTAATATATGCTTATAAAAATTTCATACTATTCTTTCATATTTACATGTGATATAATTTATTA
CD630_06930	-1	842481	4		Transcriptional regulator. MerR family	P-SigA	2.29397669988	34	TGAACATGTTCAGTATAATATTTTTTTCATCATATGTCAATATAATTTAATTATAATTTTAGTTGACTCTAACATTATGATATGGTTTATATTAATATTA
CD630_06950	-1	845320	4		Putative exported metalloendopeptidase	P-SigA?	1.39478687779	27	GAAGTTAAATTTTTTATATTATTTATAATCTTATCTATATCTTTATGTTAAATTTTCTTAACATGCATTTTTTATATTTAATATAGTAAAATAATTAATA
CD630_06970	1	847366	2.58		Putative regulator of K+ conductance			19	AATCAAAATTAAATTAATCTGTGTATATAAAATTATATATTGTGTATAAGTTTTGTATGTGTAAACAATTAATTTAAGAGATATTATATAAATTGTGTAT
CD630_07030	1	855308	4		Putative peptidase. U32 family	box -10	1.85992485028	31	ATATAAATAACTAATATATAAATTGATTGAAGAATTTAAAATATAGTAAGAAATATATAAATTTAATACAAATATTTAAGTTATAGATATAATTATATTA
CD630_07040	1	856317	10.92		Putative metal-dependent phosphohydrolase	box-10?	1.85992485028	1726	GGATATATATTAGGTGAAGTTGGTAAGGATATAATGAACTCTAATAGACCTAATAATCAAGGGCTATATATTGGAAAAGTTTTAGATTATAATAGAAAGA
CD630_07040	1	857944	2.82		Putative metal-dependent phosphohydrolase	P-SigH*/ P-SigA	3.34/ 2.132	99	ATAATTATAAACTTGGAAAAAAGGCTACAGACTTGTATAAGAAATTAGATGAAATTGGAACAGTTGCAGGACACTACTATAAAGGTGTAGAATAGATATA	CD0704-CD0705
CD630_07060	1	859621	10.95		Putative nitroreductase	P-SigA	4.15640234293	29	AATTTATGTATATTTTTCTCCATTAAAGTGTAGTTAAGGCTAGTATATTGTTAAAAAAATAAAAATTGACTTAGACAACTATTTGTTTTATACTAAAGTA
CD630_07070	1	860572	4		Diguanylate kinase signaling protein	P-SigA	2.88889094039	137	ACTTAAACTTCACTACAACTTGTAAAATTATGGGATATAGAGTAGGTATTTAGCAGGGTAAATTTGTTGTAATAGACATATAAATGAGTTATAATTTAAA
CD630_07080	-1	865019	4	pepD	Peptidase D. aminoacyl-histidine dipeptidase			157	CAAGCATTTCCAATAAAAACTGCAAGTTTTATTTCTTTTTCATTTCTAAAATTATTATATTTTTTCTCTTTTAGATATATTTTACACATATTTTGTATTA
CD630_07090	1	865003	4		DNA mismatch repair protein	P-SigA ?	1.37191329224	178	TTTTTTTATAAGCTAAAATAAACTCCTTTAAAAATATTAAAGAAGATTTTTTAACAGATTATATTACAAATAAAGCATGTTTATGTATAATATATAGATA
CD630_07110	1	868254	4.27	argS	Arginyl-tRNA synthetase	P-SigA	2.09502482052	45	TATAGTATTTTTAATATATACAGAAAACATAATTACTAAAGTGTTTTACACTGTAATGAAATACTTGAAAAAACACGAAATTTGATTTAACATAAAGAGA
CD630_07120	1	870145	1.77		Conserved hypothetical protein			108	CAATTTGTATAACTGTAAAATATAGGGATGTCGAAAACTGATGCTTTACATATAAAAAAGTAGTATCGTATAATAATATATAGATAGTAGATTACAATGA
CD630_07150	1	874744	5.21	ptb	Phosphate butyryltransferase	TGN-10	2.60560761852	26	CCCAGAATAAAATATTAAACTGTCTTTTAGTTATATAAATTCTTTATAACATAAAAAATAAATTGAGAAAAGGTATAGCAAATATGGTATTATTTAGTTA
CD630_07160	1	876207	15.92	cooS	Bifunctional CO dehydro-genase/acetyl-CoA synthase	box -10		81	ATTAAGTGTAGAAAATAAAATTTTTATGTATTATCTAATTTTGTTAAAAAAATATTTAAATCTAAAGCAAAGCACTGAAAATTAGTATATAATCAACTTA
CD630_07180	1	879461	1.82	fhs	Formate-tetrahydro-folate ligase	box -10		84	TAATAAGTAAGTAATTAGATAAATAACTAGCTATTAAGTTTGAATATTTTAATAGCTTAGTAGCTAGTTTTTAAGTAATTTTACATGTATAATTATCTTA	CD0718-CD0720? or CD0718-CD0728
CD630_07210	1	882943	1.87		Conserved hypothetical protein			16	AGCGGGGGTTGGTTCAGTTACAACATCTATACTTGCAAAACATGTAGTTAAGGCTTGTAAATTACAAAACAATAAATAGATATATATATGTGGAAGGTTT
CD630_07220	1	883656	1.91	metF	5.10-methylenetetra-hydrofolate reductase			13	CAAAAGACTATTCTAAGCAAAATAATCCAAGAAGTTTAAGTGCAAAGAAAAAGAAAGAAGCAGCAGCAAATTCATAAAAGTTTTTTTTAGAAGGTTAAAA	CD0722-CD0728?
CD630_07290	1	892245	1.69	gcvH	Glycine cleavage system H protein	TGN-10	2.90266366946	48	AGTATTAGCTTTCTTAGAAGAAAAAGGTCATCCAGCATTAGCTATGGAAAGTGTAATGTAATTGATGGAAAATTTAAAATAATATGATATAATATTAATA
CD630_07300	1	892766	2.2		Putative iron-sulfur protein			16	ATAATTAAAGATTAAGATATTATTATAATTGGGGAAAGTATAGTAAAATTTGAGTGCACGCAAATTTAGCTATACTTTCCTTTTATCATATATAGAACAA	CD0730-CD0733
CD630_07340	1	897447	3.29		Conserved hypothetical protein	P-SigA	3.80806538967	107	TTAGTTAAAGAACTATATGAAAAATACAAGAATGAAGAGTATAATAAAAAGCGTTAACTTTAATTGACTTTACATAAATTAAAGTGATATACTTAAGGTA	CD0734-CD0736
CD630_07390	1	901591	8.47		Putative exported protein	P-SigA ?	1.25033933549	27	TTAAGGAATAGTTGAAGCAAAAAGTTTGGTTACATAATAGTAATTTTAGTTACAAGAATGAAACTGTAAAACTTAGGATTTTCTTTATATAATTTCATTG
CD630_07440	1	908086	1.8		Putative MotA/TolQ/ExbB proton channel			14	GGGTTCGAATCCCTCCTTCTCCGCCAATTATTAAAGGCTATTTTTATTAAAGATAGTCTTTTTATAATGTCATAAATGATTAGATATGTATAACTAAAGA	CD0744-CD0745
CD630_07460	1	909768	4		Putative membrane protein	TGN-10?	1.27180655065	57	ACAGAATTAATTCTAAAGGAGATGGCTTTTTTATGCGAAAATCAAAAATAGATACATAGTAAGTTACCTTTTTGTAGGAATATATGGTATCTTAAATATA
CD630_07500	1	917345	6.59		Amino acid ABC transporter	P-SigA	4.94016114032	450	TAAATATAAACAGTAGTATTTAGATAATTTACAAGTAAAAATTATTAAAAAAATAAAAAACTTATTGACAAAAATATTATAAGGAAGTACAATTGTATTA	CD0750-CD0752
CD630_07590	-1	931482	4	plfB	Formate acetyltransferase	P-SigB	6.09431497292	193	AATAAAATTTATTTATCCTAAACAAAAAATAAAAAATATTTTCTCCTTAATTAGCTATTTATTTGTTTTATTTTATTTATATATGGGTATAATTTCACCA	CD0759-CD0758
CD630_07600	1	931632	4		Putative Ca2+/Na+ antiporter	P-SigE?	0.740912100942	16	TAAGGAGAAAATATTTTTTATTTTTTGTTTAGGATAAATAAATTTTATTATGGAAAAAAGAAAAAGCATACATCTTCACAAACTGAATATTTATTTAATA
CD630_07610	1	932667	4.57		Putative ATP-dependent RNA helicase	P-SigF	4.12125279498	67	TAGAATACAAGGTATATTGATGTTATTCACATATTTTCTGTACATATCAATTTTGTATTTCATGTATATTATTTAACTATACTGTTTAAAATATTAATTG
CD630_07610	1	932700	3.25		Putative ATP-dependent RNA helicase	P-SigA	2.770165474	34	TTTTCTGTACATATCAATTTTGTATTTCATGTATATTATTTAACTATACTGTTTAAAATATTAATTGCAGAATATCCTAAAAAAGTATATAATGGATAGG
CD630_07690	1	940188	4		Putative oxidoreductase subunit	TGN-10	2.40516718681	99	TTAAGTAAACATATAAGATTGTTAGTTTTTTAAAAGAGAATTTTTTAATAATATTATATTTATGAAGTATTTTTAAACTTATTTTGATAAAATATAGCTA
CD630_07700	1	942480	4.84	spoIIAA	Anti-sigma F factor antagonist	P-SigH	4.99246583939	39	GGTCAGGTAACATATAATGAAAGTATGGTAGAAATAATACGACAAAACTAGTTAAATTTCATTGAAGGAATAAAAATATAATTATAGAATTGATTAAAAG	CD0770-CD0772(sigF)
CD630_07730	1	944348	2.3	spoVAC	Stage V sporulation protein AC	P-SigF/ P-SigG	2.81/ 2.527	15	TTTTTTCTTTATTAGGCATCTTTTTTATTTTTTGACCAAACTTTAGATAGTCAAAATAAATAATAGGTTTATTTTTTTAAAATTAACAAATAATACTTTA	CD0773-CD0775
CD630_07760	1	946505	3.17		Transcriptional regulator. LacI family	P-SigA	2.44029927235	34	GCAGGTGGATATCTTTTAGATTCCACCTGTTTTTTATATAAAGAAGCGTTTACATAATTGAAGTTGACAATTATTTACAACATAGTGTAGTATTATATTA
CD630_07770	1	947879	2.8		Putative membrane protein	P-SigB/ P-SigA?	2.057/. 1.872	51	TGAATCTATAATATTTTTTTGATTCATAACTAAAAGTATATAAAAATGATGAATAAATATATATTATACATTATCAATGATAGGTTATATAATAAAATCA	CD0777-CD0780
CD630_07810	-1	954499	4		Putative penicillin-binding protein	P-SigF*	3.96736115557	21	TTGTTTTTCTATCTACTATTCTATTCAAAATTATCCCCTCCTATTTATTTATATGTAGCTTTGGCATAATTTTTATAATATTTGTCAAAAATAAATAAAA
CD630_07810	-1	954378	2.63		Putative penicillin-binding protein	TGN-10	3.23284250043	142	ATATTACGTTTATACATATACAATGTACAGAATATTATAGCAAATTCATTTTTTCTATTAATTACAAAACTACTCCTATTTGTGTTATAATATTGCATTA
CD630_07850	1	957770	5.01		ABC-type transport system	P-SigA	2.18837174965	32	ACACAAAGAAGAAGTTTATTTTAGGTTAAATTGTCGTAAATATAACTAAAAATATTGGGAATACTTGATTTAAGTTTAAAAAGAATATATTATAGTATAG	CD0785-CD0786
CD630_07880	1	960498	4		Putative GTP-binding protein. HflX type	TGN-10 ?	1.468	149	TTGTGATTAAAAAACTTATAATTTTCGCCCATATTTTCCTCCTAATTAAATAAAATTTAAATTTTTTATACTATATAAGATTTTGGTGATAATATAATTA	CD0788-CD0789
CD630_07890	1	961316	18.94		Conserved hypothetical protein	P-SigH	4.17960665005	622	ACACAGAGAGTTAAGCGTTTAAAGTCAAATATACCGATTGTAGCACTTGTTGGGTATACAAATGCAGGAAAATCTACCCTGTTGAACGAATTAATAAAGA
CD630_07940	1	965088	4.98	nadE	NH3-dependent NAD(+) synthetase	TGN-10	3.96076189694	33	TTATATAAAATAAGATTAAATATAATCTTTCATGTTTGTTTAATTTTGCATAAAAAAAAACATATTAAAACAACATATTAATATATGGTATAATATATTA
CD630_07950	1	965912	7.09		Conserved hypothetical protein	TGN-10	2.48806452212	47	TGAAAGACTTCATAGATTAAGTGAACACAAGAGAAAAACGCCTGCACAACCTCCTAAGTTCTAATTTACTATTTATAAGATTTGTGATAAAATTTACAAG
CD630_07960	-1	967888	3.4		Transcriptional regulator. LacI family	TGN-10	1.61611937301	39	TAAGTAAGAAGTTTTTTTAAATTTATTTATTCTAATCCTGTAAAATATGCACCTTGTAGAATATTGTTCTTTAGTTGAATATATGTTAAGATTATTGGTA
CD630_07970	1	968026	2.09		Putative pyruvate carboxyltransferase	P-SigA	3.8031969555	89	TTCTACAAGGTGCATATTTTACAGGATTAGAATAAATAAATTTAAAAAAACTTCTTACTTATGTTGACATAATTTAGTTTATAGGATTATAATATGCTTA
CD630_08000	1	972266	2.02	crt1	3-hydroxybutyryl-CoA dehydratase	P-SigL*	5.50423443954	55	TTATGTATATTTCGTTTATTTTATTAAAAATAACAATTTTTTACTAAAAATAAAGAACTTCAATGGTGATTGGCATAGTACTTGCTATTTTATATTAACA	CD0800-CD0805
CD630_08060	1	978585	2.38		Transcriptional regulator. sigma-54-dependent	TGN-10	2.91598642145	441	TACTCCAGAACTTACTGAAAAAATGATTAGAACTAGATTAGTAGAGATACTTCCACAAGAAAAGAAATCTGTAAATCTAACTGATGCTAGAATAATAGTA
CD630_08060	1	978976	4		Transcriptional regulator. sigma-54-dependent	P-SigA	2.5283468623	50	GGAGATTTATATGAAATTATACCTGAAATGATAGAATCATTAAATAGGTAACTTTTAGAAAACATTGAATATGTAGAATGATAAGTCTTATAATATTGTA
CD630_08100	1	982674	1.4		Putative flavodoxin/nitric oxide synthase	TGN-10	3.51217679331	38	AAAGTAATAAATGTAGGTGTTTTTTATGGGAAATAGTTAATAAAAAAATAATCGATTAGCTCTTTGTAGGACAGCAAAATTAGTGATATAATTTGATGTA
CD630_08120	1	985373	1.01		Putative universal stress protein A (UspA)	P-SigA	3.55111309072	108	TTTGTTGAAAGAAAATACTTTTACAAGTTAACACCCTTTATTTTTTTAATTACAACTTTGTTCATTGACACTGCCAGCGATATATTATAAAATTAACACA	CD0812-CD0813
CD630_08250	1	1000259	1	rbr	Rubrerythrin	P-SigA	4.13476247073	48	TATATGTTTTAAATAATATATTTGAAAATAGGAATATTTAAATAAAAAAAATAATATTATATATAGTTGACAAAAATTGGCAAATGATATACTATATAAA	CD0825-CD0827?
CD630_08300	1	1004918	3.32		Putative membrane protein	P-SigA	1.59173334985	52	ATAAAAAATATTTAATACAAAGGTAGAAATAAGTTGAAAATGTAAAGTCATTGGAAAAATATAGTTGAATTTAATGAGCAAAAATGTTATTGTTTTATCA
CD630_08320	1	1007961	4	aksA	Trans-homoaconitate synthase	P-SigA	2.33875262314	142	AAATGCAAGAAAAACATAATAACTTTCATTTTTAAGAAGTTTTCACAAAAAAGAAAAAATATAGTGCAATAAATGATACAAAGTAATATAATAGATTACA	CD0332-CD0334
CD630_08350	1	1012509	6.1		Transcriptional regulator. MarR family	P-SigA	2.49706061441	104	ATCCATTTTAATTTTAAAATTAATTGATTAATACGCAAAGAAAGATTAAATAAATTTATTATTTTTAATTGAACTTTCAACCAAAATATGGTAAAATTTA	CD0835-CD0836
CD630_08370	1	1013589	9.96		Putative nitroreductase	TGN-10	2.31049247414	98	AAATGAATTTATTACTTACAAAGTGTGGTTTTATAAAAATCGGAGAAATGAGTTTTTTAGGAAAGGAGAAATCTTTCTACTGTTATGATAAAATATTATA
CD630_08380	1	1014351	3.14		Putative DNA-binding protein	P-SigH	4.18973284178	46	TAATATATACTTAAAATTGTAAAAATATATCTGAATTTTACTAACTTATCTAGGGGTTATGTACAAGGATTTTAAAGATAAATATAGAAATTAATGTTTA	CD0838-CD0839
CD630_08400	1	1015601	1.27		Putative isomerase/hydrolase	P-SigA	4.28401169463	53	ATATATTAATAACTAATAAATTTAATAAAAATTATTTGAATATTTTTAAAATATATAAATATGTATTGACATATAAATATTATGAATTACAATTTATATA
CD630_08410	1	1016566	1.76		5-aminoimidazole-4-carboxamide ribonucleotide transformylase	P-SigA	2.9771223891	71	TATTTAAAGCATGGCGATATAGTTGAATGTAAAGTCGAAGGAATAGGAGTTTTAAAAAATATAGTTGATTAATGGATAAATATGCCATATAATTTTATTA
CD630_08420	1	1017903	4		Conserved hypothetical protein	P-SigA?	1.49114875808	37	CATCATTAAAATACTGAAAGTATAAAGATAATATAGATTAAGTAAAAATCTACAACAAGTTTTGTTGTAGATTTTTTTATTTGCTGTATAATTTTAAATA	CD0842-CD0843
CD630_08440	1	1020146	6.43	cwp25	Putative cell wall-binding protein	P-SigA?	1.91340492825	27	TAATGGATGAATTGTGTTTAGTCTAAAATTATTTAAATTATAAAAAAGTGTAACTATTTTTACACTATTTTTAAATGATTTTATATTATACTAATACTA
CD630_08460	1	1021890	4		Conserved hypothetical protein	P-SigB	2.25149296539	84	TAAATTTAATTATGAATTAGTCATCAATAAACAAGAAATTTAGCTGTAGAAATCCATTATAAAGGCTATTATAAATTTTAATATGCTAAAAATATAAAAA
CD630_08500	1	1026605	9.5		Putative NifU-like protein	P-SigA	3.67154144777	27	ATGATGTATTTATGGATACTAAAATTATTGATGAAGCAAAAATTGAATTTGATAAATCATTAGATGGACAAAAATTTAAACCATTGGTATAATTTTGGTA
CD630_08520	-1	1028168	4		Transcriptional regulator. MarR family	P-SigA	3.25251002047	27	ACCTAAAATAAAATTTTTATATTCTATTCTTCATTATTTTCTATAAAATTATAAAATTTTAGGTTGACTATATAAGAAAAGTATATTATATTAGTTTGTA	CD0852-CD0851
CD630_08530	1	1028350	1.33	oppB	ABC-transporter. oligopeptide-family	TGN-10	3.02902401915	118	AAAATTTTATTTTAGGTATAAATAAAATAATTTGATGAAATTTTAACAATTTTTAAAAAGTTTGTTTACACAGTTAATAAATGATGCTAAAATTAACTCA	CD0853-CD0857
CD630_08650	1	1041788	1.84		Putative ADP-ribose binding protein	P-SigH	4.46388162864	57	AATTTACTATCAATCAATAGAAATAACCAGAGAAGTTGCATAATAAAAAATTTACACTTTTAACAGGATTTATGTAGGTGTTTATAGAAATAAATAAATA
CD630_08680	-1	1045642	4		Conserved hypothetical protein	TGN-10	3.26593869863	16	TTTAATTATATATACATGATAATAAATTTTCAAGTAATTTATTTACACTACTTTTAAATATTTTGCTACATTTTCCTTTTTTTAATGTTAAAATAACCTT
CD630_08690	1	1045744	8.39	modA	ABC-transporter. molybdenum SBP	P-SigA	3.41516052154	75	GTTATTTTAACATTAAAAAAAGGAAAATGTAGCAAAATATTTAAAAGTAGTGTAAATAAATTACTTGAAAATTTATTATCATGTATATATAATTAAACTA
CD630_08730	-1	1050334	1.39		ABC-transporter. sugar-family	P-SigA	2.36178117428	60	TCTTAGAAAAATTTGAATATGCAGTTTAAAATAATATATCTATTGTATTAAACTCGGCTTTAAAATAAAGTTAAAATTACAATAATTATGGTTACTTTGT
CD630_08750	-1	1052407	2.32		ABC-transporter. sugar-family	P-SigA	4.30154450901	358	CAATACATTAATTTAAAAGTATTCTGAGTATACATTATTTAGTATTTTAATTAAATTTAGCAGTTGACTTTTATTATTGTATAATTTATAATTTATAACA	CD0875-CD0874
CD630_08780	-1	1056020	1.93		ABC-transporter. sugar-specific permease	P-SigA	3.58747499966	384	ATGTAAAAATTTTTTTATTTAAACTCAATTTTCTGATAATTTGATAATTTTTCAAAATTTATAGTTGACTTTTATTTTTTACTGTATTAAACTAATTACT	CD0878-CD0876
CD630_08790	1	1056276	4		Putative carbohydrate kinase	TGN-10	3.40148251306	159	AAGTCATAAAAGATTATAAAAATAAAGAGATATTTAGATAATTAGTGTAAATAGGTTTTAAATCAACATAATAACTTAAATTATATGGTATAATAAATTA
CD630_08800	1	1057221	4.03		Putative protease			966	GATGTAGTTGTAGAAAAGATAGGTGTTCCAGATTTTATTACAAGAAAATACCATGATGAAGAGTTCATAACTGATAAGACTTTTGTAAAAAATAATATTA	CD0880-CD0881
CD630_08800	1	1057794	3.54		Putative protease			393	GATGTTGCAAAAGAATTTGCTCAAAAATATAATCTGGTGGTGCTTTTAAAAGGTTATCAAACTGTCATAACAGATGGTAAAAAAACATATATAAATCCTA
CD630_08800	1	1057996	3.84		Putative protease			191	GTGGAGCATATATACATGGCTATATAGGAGATAAATTGAGCAAAGCAATGTATACGGTAAATGCTACGGATTTAATAAGTAACATTTCATTAACAATGAA
CD630_08820	1	1060072	4	glgC	Glucose-1-phosphate adenylyltransferase			396	AAATATAAACATTAATACTAAGAAAACTAATAAATAATTTAAAAGTTTATGTCCTTTTGTTTAAATTATAGACAAAGAAGTATCAATTAAAAAATAAAGT	CD0882-CD0886
CD630_08870	1	1068703	18.36		Transcriptional regulator. GntR family	TGN-10	2.29398826272	77	TTTTCTACTTTTTTTGTATAAATTATCATAAGAATTTTAGTATTTCAAAATATTACAAAGAAGTATAAAAAATATCATAATTGTGATATTATATAAATTA
CD630_08920	-1	1074228	1.22	cspA	Cold shock protein	TGN-10	2.1043269112	53	CACTGTATAATTTAACAATTTTTATTAAATTCTAAAAGTAATTAATTTTTTTAAAAATTTTATTTGCTTTTATTTAAAATTTATGTTATATTAATAGAACA
CD630_08930	1	1074569	4		Putative iron-dependent hydrogenase	P-SigA ?	1.88964338454	73	AAAATAGTGAAATTTCAGAAATATCAATAATATTATATAATAAAACAAAAAAACACTATATATATTCGATAAAATAAAATTTAAACATATAATATTTTAT
CD630_08930	1	1074611	2.53		Putative iron-dependent hydrogenase	TGN-10	3.37220918054	31	AAACAAAAAAACACTATATATATTCGATAAAATAAAATTTAAACATATAATATTTTATGTATATATTAATAAAAGGACATATTGTGTTATAATGGTATCG
CD630_08940	1	1076334	4.19		Putative iron-dependent hydrogenase	TGN-10	3.16382640212	78	CAACTAAAATAAAAATTATATACACTTAAAATAAAAATTACATATATAATATTTTGTATATAACTTAACAAAGTATATGCCTATGTTATAATAATTTA
CD630_08960	1	1079040	1.77		Conserved hypothetical protein	P-SigK	2.41301056501	45	GGTAAGACATTGAGTGTGAATCAATAATTTTTTTAAAAATATCTAAAAAAATTTAAAAAAATCATTAGCAAATATTACCCCTTAAACATAGTATATTTTA
CD630_08970	1	1079328	8.95		Conserved hypothetical protein	P-SigB	4.49164562959	171	ATACTTTGTGAATGTGGTGACGTTTTTGATGGAGGATGTGGATGCTAAAAAAATCAATTTAGATGATTTAATAAAGCTTATGGTGGGTATAAATAAAATA
CD630_08980	1	1080011	1.03		Conserved hypothetical protein	P-SigA	2.99306729043	100	AAATAGAGTATTCCTATTTTATTAGTTATATTAGGTATATCTTATTTACCATAAAACTATCTTGAAAAAAATTAATCTTAATTGTATAATATTACTTTGA
CD630_09000	1	1083309	3.51	opuCA	ABC-type transport system. glycine betaine /carnitine/choline	P-SigB/ TGN-10	3.254/ 2.99	57	ACTATATATAAATACTTTATATTTGTAGCAATATTCAGACAAATAGTGACCTAAAAATCGTACTTTGTTTACATAAATAAAATAGTATGATATAATTATA	CD0900-CD0901
CD630_09020	1	1086288	19.98		Putative cation efflux protein	P-SigK	1.6852522181	88	TTATTTTTATGTATACCAAAACCATACCTACGATTTTTATTTATAATTAAGTTTCAAATAGAATGAACAAGTACAACCAATTTTGAATATAAATATAGTA
CD630_09150	1	1097422	4		Putative phage protein	P-SigA?	1.0809156827	20	ATTCTTCAAAGATTAGGTTAGGAGGAAATAAAATGGCAGCTTTAATAATGGTAGGTTTATTTGCAATATGTTTAGTAGGATTAGTACAAAATAGAGATTA
CD630_09200	1	1100413	4		Putative phage protein			25	AAAGAACTTATAACTGGATGCCCACATTGCAGTAGAACTTTCTGTGATTAAAAATACAAAAATTATTAGGGAGTTAATATAACTATTAACTTCCTAGAAG
CD630_09320	1	1106297	3.51		phage protein			147	TGGTTTAGAAGTAATTGTAGTTAAGTTTAAAGATGAATATTCCCTAGCTGGTTGTGATGAAAAAGATGTAGAAAAAATAAGAGATGCATATTATATTTTA	CD0920-CD0925
CD630_09390	1	1110749	3.69		phage protein			84	GATATATGACATAATTTTTTATAGTGTAAGTTATTTAAATTAATTATAAATAACAGTAATTTTATTATATAAAATGTACATATTGTGAATAATAATAATA	CD0939-CD0940
CD630_09401	1	1111413	1.98		Putative phage protein			302	GTTTGGACAATACAATGAAGAACTAAGAAGATATATTATTGGAGCACCTTTGATAGGGCAAATAGGAAAGAATTATTCAAATAATTATAATAAATTAATC
CD630_09420	1	1112308	28.98		Putative phage protein	P-SigH*	5.01605219554	16	CTCCTTTCAATAGAATATTAGCATAAAATTGTGGTGAATTCTGCTATTGTCGAACGATTGTTGAAGGATATTGTATAATAACATAGAATTTACTATACTA
CD630_09461	1	1117356	10.68		phage protein	P-SigA	3.27198824302	94	TGGCAAAGACTTATAAATGGTACATACGAAGATATTGATATTCTCTTATTAAAACATGAATACCTTGAAAGTATATTTGAGAAAAAGTATAATATAAGTA
CD630_09470	1	1117901	4		Putative phage scaffold protein			89	ATTAATTGTATTGCTAATGTCAATGTAGGTATTCTTTGCAATAAATTAAAAGAAAAAAATGAAGCTAATATAGATAAAGTTTCTGATGAAATTCTAAAGA	CD0947-CD0955
CD630_09562	1	1124042	5.41		Putative phage protein	TGN-10	3.32026424842	83	GCTGAAAGAGAGAGAAAGAGGGGACGAAGAAGATAGCAAAATAAAAAAATAAATATAGAATAGGTAAAATATGTAATAATTATATGTTATAATATTTTTA
CD630_09570	1	1125592	5.23		Putative phage lipoprotein	TGN-10	3.85424842571	358	GGAAAAAAGAAAAGAAAGAGAATAAATAATATAGATAAAGCACTTGGATATTGTATAGTTTCAAGTGCTTTGTCTGTTAAAAAATGGTATAATAGAGATA	CD0957-CD0973?
CD630_09680	1	1135585	7.67		Putative phage protein	P-SigH*	3.10958367313	1533	GGGGTGCTAGTGGAGGTGGTCGTTTTGATGAGTGGACTGAATGTGCTAAAGGTGGCTATTCTAAAGGAGAACTCACATTAAAAAAAGAAACTATATTATA
CD630_09750	1	1139652	5.96		phage protein			124	GATATCAAAATTGTTCAGAAAAGAGTATAGTATGAGAAAATATTAAACTTTAATGAAAAAAGTAACATGTTTATATAATCATAAAAATAAAAATATATAG	CD0975-CD0977
CD630_09750	1	1139695	11.18		phage protein			81	TAAACTTTAATGAAAAAAGTAACATGTTTATATAATCATAAAAATAAAAATATATAGAGCAGATGTATAAAAACTTAGTATATATGAGAAAATATTAATA
CD630_09772	-1	1141994	4		Putative phage protein	TGN-10	2.2658761826	31	TTCATATTTTTTATTTATACAATATATTCTATATTGCAATAAAAAACATTGTTTTAAATATATATACATAGGTATATACTAAATATGTTAAACTTAATTA
CD630_09780	1	1142844	11.12		transcriptional regulator. beta-lactams repressor Phage-type	box -10?	1.33668346419	137	TGAAAGTTATTTTTCTTCTAAGAAAACAAACTAAAACAGTAGAATATTTGGTAAAAATTACCTATAGTTTTTGTCCTAAAAAGCTCCTATTATTAATTTA	CD0978-CD0979
CD630_09810	1	1144708	4		Putative membrane protein	P-SigA	2.97583749025	74	ACACTAATCTATGTTATATAAACAATACTTGACTGATTATAACATCAATAAAGTAAATATTGTGGTTGTAAATAAAGAGTTATTCAATTACAATAAAACA	CD0981-CD0984
CD630_09850	1	1148216	2.63		drug/sodium antiporter. MATE family	P-SigA?	1.75284461926	102	AAAATTTTTAATAATAAATAAAAAATGAGATAAAGTATTTAACTTCAGTTAGTTCTAAAATGTTTACTATGGCAAAAGAAATATAGTATAGTATTACTTG
CD630_09860	1	1149858	9.49	rpsA	30S ribosomal protein S1	TGN-10	3.48517356539	27	ATATTTTCTATAATGTATAAATATATGAAGTTGAATTTATTTTAAAAATTGTAGTAAGAAAAATGTAAGTATTTGCAATATTAATGGTATAATATTTACA
CD630_09890	1	1152580	3.46	leuA	2-isopropylmalate synthase	P-SigA	4.65358333958	401	TAGTTAGCATGTTTTATAGAATTGCTTATCAAAAATAAAAAATTGAGATAATTATTTTTTGTGTTGACAATACATTTTAATGTGTATATAATAACTATTA	CD0989-CD0992
CD630_09930	1	1157765	4		Putative thioesterase	P-SigA?	1.52362876499	138	TCTTTTTTATATTAAGTAAAATATATTTTTACTATTTTAATAACGAAAAAGAGGCTTATATCTACTTTGAGTTTCTATTTTGATAAAGTTATTTTTTGGA
CD630_09940	1	1158733	15.78		Putative serine-pyruvate aminotransferase	P-SigA	3.37232123866	58	GTAGAAAATGAATGTTTTCATAAAATATATAAAATAAATTATATATAAAAAATAAATTTTATGTTGACATAGTTAATTCAGCTTGATATTATAGTTATTA
CD630_09980	1	1166810	4		Putative iron-sulfur protein	TGN-10	2.83861044434	72	ATATATACTTAAAATCGCAATTTGAATTTATTAGACTTAAAATGTCTATATAAATCATTTAAGTTGTGGTTTTAAGTATTTTTTATGATATAATTAAGCG
CD630_09990	1	1168879	2.61		ABC-type transport system. nitrate/sulfonate/taurine	P-SigH	4.28768749825	43	ACAAAAAAGTTCAACTAAAAAAAAGAAAAAACATTAAAGTATAAATAAAAATACTTAAAAAAGAAGGATTATTCGATAAATTAACAGAAATTAGTATAAA	CD0999-CD1001
CD630_10060	1	1175052	4		Putative acyl-CoA N-acyltransferase	P-SigA	3.13714719256	40	ATTACTTTAGTAGATACATGGTTGTAAAGGTTTATAGAAAAAAATATAGGAAGGCAGATTTTTATTGTTGCGTATATATGAGAATGATATAATATGAATA
CD630_10080	-1	1177007	4		Conserved hypothetical protein	P-SigA	1.7526653668	142	ACTTTAAAAGAAATTTTATTTCAATACTTTTTAACTTATTTTGTAAAAATTTTAATAAAACCTAAAGACAAAAAAGAAATTGGAGTTTATACTATATAAG
CD630_10110	1	1178949	1.85	nagB	Glucosamine-6-phosphate deaminase			187	ATAATACAAACCTTAAAGTGAATGAAGCAATTAATTTAGCTTCTTTAAATCCAGCAACATCTTTGGGAATAAATGACAAAAAAGGAAGCTTAGAAATAGG
CD630_10150	1	1183056	2.37		Two-component sensor histidine kinase			334	AGTGTGTAAGTATAATCAAAAAAATATAGTTGTGATAATAGAAGATGATGGAATTGGAATCAAGAAAGAAGATTTACCTCATGTTTTTGAAAGATTCTAT
CD630_10160	-1	1186225	4		Transcriptional regulator. MerR family	TGN-10	2.25454588684	29	AAAACTACAACAATTAAAACTCTATATGGTTTTAAAAAATGAATTAATTTTTTCATATAATCACACTCCTTTACAAAATACTATGATAAACTATACTGTA
CD630_10220	1	1193988	2.22		Putative membrane protein	P-SigE	2.406	97	TAAATGTATAAATTACTTCACCAAAAAATAATGACAAAAATTGTAACTAAGTTGTAATAAAATGGTAGTTATTTAGCATAAAATAATGTATCATAGAAGT
CD630_10350	1	1214487	3.92	cwp16	Putative N-acetylmuramoyl-L-alanine amidase. autolysin	box-10?	1.27399242889	81	TGAAGATAATTAAATATATTCAATATATTTAATTTTTTTATTTTTTGTTTTTATAATTTTTTTAGAAGTTTATTTTTTATATAATTATTTATAATTTTGG
CD630_10430	1	1232335	2.44	sbcC	Nuclease SbcCD subunit C	P-SigE	2.8614721993	602	AAAAAATTATTCTGAAAAGGTAGGAGATATATTTAGAAGTTTAGAAGAAAATTTTAGAAGTGATACTATAAATATAGCCGTATCACATATATTTGTAATA
CD630_10440	1	1236535	2.05		Putative membrane protein	P-SigA	3.1535720242	60	GTTCAAAAGTAAAAATTGAATATAGTTAGAAAATATATGTTAATTGAATATATTATCTAATATTTCCAAATAATATGTAATTGTGATATAATAAAAACTA
CD630_10460	1	1238366	1.98	pepT	Peptidase T			773	ATGAAAGAATTAATGGGATTTTTAAATAATATATCTGCTAATCCTGAGGATATAAGTAATACTATTATGTATTTTTTAAATAAAATAAATGACTTTATGA
CD630_10470	1	1240411	4	cwp18	Putative cell wall-binding protein	P-SigA	2.2956507375	161	AAAGCTACTAAACTAATTGTAAGAATAGCTGAAAAATATGCTGAAAGAGTTTAGTTAAAAAGTATTTAAAAATTAAGCATTTAAAGTTATAATAGCTATA
CD630_10490	-1	1243406	2.09	ppnK	Inorganic polyphosphate /ATP-NAD kinase	TGN-10	3.853118967	16	TTTTTTATACCCACCTATACATATTTTAACACATTCACTACAAAGGTCATTTATAAATTTATAAATTAAGAATTATAAAACTATGTTATAATACAAAGTA	CD1049-CD1048
CD630_10500	1	1243490	2.62		ABC-type transport system. multidrug	P-SigA	2.84032008523	35	ATATTCACCTCTTCATACTTTGTATTATAACATAGTTTTATAATTCTTAATTTATAAATTTATAAATGACCTTTGTAGTGAATGTGTTAAAATATGTATA	CD1050-CD1052
CD630_10540	1	1246719	4	bcd2	Butyryl-CoA dehydrogenase			201	ATAAATATCGTAAACAAATTATTTTATCTGTAACCAGTGTGAAAGAAATCTTATTCTAACTTGAAATTTCACAAAATTCCAAAAAGCGAGATTTTTTTTA	CD1054-CD1059
CD630_10540	1	1246797	2.31	bcd2	Butyryl-CoA dehydrogenase	box-10	2.24479373589	123	CCAAAAAGCGAGATTTTTTTTAAGTATAGTTGATTTTAAATTAACAATTTATGATTAAATTAATGTCATAATTGGTTAGTATAATCACATATAAATATAG
CD630_10620	-1	1255467	5.21	acpP	Acyl carrier protein (ACP)	P-SigA	2.55248134988	33	TATTCATCAAATAATACTTTATTACTACATTTATAAAATTTTATTATTTTTTATAGATTCCATATTGAAAAATTCTTGATATTATATTAAACTAACATTA
CD630_10630	1	1255576	8.53		Conserved hypothetical protein	P-SigE?	1.42075672739	30	TTAATATAATATCAAGAATTTTTCAATATGGAATCTATAAAAAATAATAAAATTTTATAAATGTAGTAATAAAGTATTATTTGATGAATAAACTTTATTG
CD630_10631	1	1256034	1.03		Conserved hypothetical protein	P-SigK	2.62216658653	45	TGATAGATACAATAAACTTGGTGAAAAAGAAATAAATAAACTAATCAATAAAAACTTTTTAGAAGTAACTTATCTGTCTATTACTACATATATTTAATTA
CD630_10632	1	1256423	1		Conserved hypothetical protein	P-SigK	2.98798512021	44	TACAAGTTATGGTTTTACCTTTTTTAGTTCAAATTAAAAAATTTAAAAAAATAGTAAAAATACATTAGCAAAATGGAAACCAAATGCATAGTATATGTTA	CD1063.2-CD1063.3
CD630_10640	1	1257054	1.17	ccpA	Transcriptional regulator of CCR	TGN-10	2.79225364213	79	TAAATTAAGAATGAATATTATTAAATTTGTTGAATATAGGGTATAATATAAAATATAATGTATTTAAATGTACTTGCTTTTATGGTAAAATAAAAACTTA
CD630_10670	1	1260209	3.78		Conserved hypothetical protein	P-SigK	3.34300326266	56	CTTTTTTTATTAATATGCATTTTTCTACTAAATACGCCTAATTATTGATAAATTCAAAAAGCAAGTAACAATTAAGATTATAAAAGCATAGTATTAATTA
CD630_10710	1	1265026	1.67		Conserved hypothetical protein	TGN-10?	1.84515758745	307	TGGAAGAATTATTTGAGTCATATAGAGAAGATATATACTGATAAGTATAAATTGGCAAAAAACTTGATTAATGACAAATTGAGTGGTAAATTAAAAGTTA	CD1071-CD1072
CD630_10730	1	1267144	4		Transcriptional regulator. GntR family	P-SigA	3.90571967502	79	GCAATTTGTCACACTAGAGAAAATAAAAGAAAATACTGTCAAATTAAAAATTATTTAAAAAAAAATTGACAACGATTTCATCTTGTTATAATATGTAATA	CD1073-CD1078
CD630_10790	-1	1272291	4		Transcriptional regulator. LysR family	TGN-10	3.61214740738	24	TTATTCCTAAACAATCAAAAACTCCATGAATATTTAAAGGTTTTCTATTTTAAAAATCACCTTTGACTATTAATTTATCAAATATGTTATAATAGTTTTA
CD630_10800	1	1272537	1.92		Putative lipoprotein	box-10	1.45910382673	92	AATTTTCAAAATTCAACTTTAAAGTGTTTTTTATTACAGAAAAATTACAATTAGCTTCTTAATCTTATTAAATTCAAATAAATATTATATAATTATTTTA
CD630_10840	1	1275903	3.76		ABC- transporter. multidrug-family	TGN-10	2.76198818307	57	TACAACTATATGATATAAATCTTCAATTTTATGAAAAAGATTGTTATTACTTTGTAAGTTTATAAAAGATTTAAAGTTATTGTTATGTTATACTAATTTA
CD630_10850	1	1277972	6.17		Putative membrane protein	P-SigA	2.59749275467	51	ATTTAGAAAACTAACTTTAATTTATGGAATTTATCGAATTTTATGAAAAAAATCGAATTTTGACTTGAAATGTTTTTCAAAAGTAGTAAAATAATGGATA	CD1085-CD1086
CD630_10910	-1	1285742	28.02	int	Integrase Tn1549-like	TGN-10	3.3763432787	42	ACCGTATTCAGATTAAGCGAAAGCAATTTGAAAAAATGATTGATACGGTGGACGCAATCTAATAGTGAAATCGAGCCTTGAATGTGGTACAATGTAGTCA
CD630_10970	-1	1290081	4.76		ABC-type transport system. multidrug	TGN-10	3.49226277101	18	CGGGAGCCTTAATTATTTTTGGGACAATATTTCAAATTGCAAGGTTAATGCAAGGTTGCGGCAAGGTTAATGCAAGGTTGGTATGATAGAATACTTTACA	CD1097-CD1095
CD630_10990	-1	1292028	8.84		Two-component response regulator	P-SigA	2.7034589312	176	CCTTTCTCCTTGGATATGTTTATACAGTTCCACTAAATAGCCATAATAATTCATATTTATATACTTGCTATTGTTCGTGTGTCCGACTATAATTATTATG	CD1099-CD1098
CD630_11000	1	1292088	4		Transcriptional regulator. HTH-type Tn1549-like			71	ATATTCCATAACAACACCCGTCCTTTCTGAAAATCTTATCATAATAATTATAGTCGGACACACGAACAATAGCAAGTATATAAATATGAATTATTATGGC
CD630_11030	1	1294434	23.2		conjugative transposon protein Tn1549-like. CTn4-Orf21	TGN-10	3.48199088345	59	ATAGACAGCATTTTACGGCAGCCAAGAGAGCCGGAACGGGAAAAAGGGAAAGAACGCGGGGAGTAGCTTTGTTCATACTTGTGTGATATAATAGTTCCTA	CD1103-CD1103.1
CD630_11190	1	1315084	2.63		Lipoprotein			87	ATAACAAAAGATAACATCCTTATTTCTGTATTAAGGAGCTTATAATTTTACTAATAGTAAGTTATAAGAATTGGATAGGAAGGTGATATGTATTGAATAA
CD630_11200	1	1316025	1	pflD	Formate acetyltransferase	P-SigA	2.18238056911	56	TTTAACAAAAAAAGTATTAATATATAGGTGTTCAAGGTAGATGAAAAAAAATAAGTTATTTTGCTTCCATTTTATGCTAAAGGACAGTATAATATAATTA	CD1120-CD1121
CD630_11220	1	1319327	12.85		Transcriptional regulator. RmlC-type	TGN-10	2.39958013818	63	ATCATAAATTTGGAATCGATAAATATAAGGCATTAGGGCTTGAAGATTATATATATGAATTTGATGAAATTTGTAACAATCATATGTTAAAATTAAAAGA
CD630_11230	1	1320077	5.45		Putative phosphoesterase	box-10 ?	1.56386368112	28	TTAGAAAAGGATAACTTATTTTTATAATGTCGAAAAGATTTATATGTATGTGATGATGTTATTGTTTTAAAAAAAACATAAAAGCATTATAATAATATTA
CD630_11241	1	1322379	10.1		Conserved hypothetical protein			243	GAACTTTTTACAAATTTCAAAATGACTAAAAAATTTAAATTTCATAAAATATTTATGTAAAAATCATATAAAATTCATATAGCATATGTATCATATGAGG
CD630_11260	1	1324333	2.5		Transcriptional regulator. AraC family	P-SigA	2.373	111	AATTTAACTACACTTAAATTAATTTTTATAAAAAGTTCAATAACATTTTATAATATAATGTTATTGAACTTTTTTATTGTATAATACAATTTTTATATTT
CD630_11261	1	1325460	5.17		Transcriptional regulator	P-SigA	2.90782039703	42	CATGAAATTCTAAAATTACAGGCTGAAAATAGTCTGTTATTTTTTTGTAAATATGGAAAGTAAGCTTTACATAAATGGAATATAGTTGTATAATTATGGA	CD1126.1-CD1127
CD630_11280	1	1326538	4	polA	DNA polymerase I	P-SigE ?	1.58932123406	36	AGCAAAAAAATATATTGTTTGCAACATATTTAATTTTAATATACTATTATTATTATTATGGGAATATTAAATAACAGTATATTGGTATATAATATATATG
CD630_11290	1	1327597	13.22	coaE	Dephospho-CoA kinase	box-10		1634	GAAAAATTTATAGATGAAGTAAACAAAAAAGGACAAGTTATTTTAAAAACTGTTAGAGGACAAGGTAATATACTTGAAAAAAATATAATATATATTTTTA
CD630_11320	1	1332144	11.92		heavy-metal transport/detoxification protein	P-SigF/ P-SigG?	3.231/ 1.61	24	GTATATGAGGGAATATCTAATTTAGATATAAAATCGAATGAATCAAATTAAATGATTAATTTCTATTTAAAAAGTATAAACTATATGATAGAATACCCTT
CD630_11330	1	1332562	6.13		Conserved hypothetical protein	P-SigK	2.44938143004	19	CATTACTATTATCTCCCCTTTTAAATTAATATATACATAAAAAGTAAAAAAATTTTGTAATGACTCACATTTCTTGAGCTTTTTGAATATACTATAAATA
CD630_11350	1	1333840	3.1		Putative SH3-domain protein	P-SigA	1.7498153145	50	GATAATTATTGGATTGAAATACTTCCTAAAAATCACTAATTTTAAGGATATGTTTATAATTTCTTTACAATTAATAAGAAAATAAGTTATCATTAAATTG
CD630_11360	1	1335267	13.68		Conserved hypothetical protein	P-SigA?	1.78702606482	29	GCAAGAAGATTTGTTTAGTAAGTACAATTTCTTATTAAAAAATTAGAAGAAATAATTATTTATATTCATAAATTGTGACTCTTAAAAATATACTTTATTA
CD630_11370	1	1336415	4.24	rnfC	Electron transport complex protein	P-SigA?	1.58314681488	41	CTTAATATAGAGGTATTGATTTATAAAATAAATTATAAAAATACGGATATTTTTTTAACAATTGTTAAGATTTTTTAATATATATAGTATACTTATAGAA	CD1137-CD1142
CD630_11430	1	1341385	3.97		Putative Maf-like protein	P-SigA	2.00675525602	380	TAGACCCTAATAAGTGTGTAGGTTGTATGCAATGTGTAGCAAAATGCCCTACAAAAGTAATATCAGGTGACATAACTAAGAAAAAGAAAGTTACTATTGA	CD1143-CD1144
CD630_11450	1	1343045	1.47		Rod shape-determining protein MreB	P-SigH *	2.52916050276	78	ACATCAAGACTTATTAAATGTGGAGAAATAATTGGAATAGAAATAATAGACCATATAATTATTGGAGATGGATTATACTTTAGCTTTAAAGAAAATATGA	CD1145-CD1148
CD630_11450	1	1343078	3.11	mreB2	Rod shape-determining protein MreB	TGN-10	2.27422977355	45	GGAATAGAAATAATAGACCATATAATTATTGGAGATGGATTATACTTTAGCTTTAAAGAAAATATGATAATTTGACTTTATATGTGATAAAATAATAGGA	CD1145-CD1148
CD630_11490	1	1348656	14.52	minC	Cell division regulator (septum placement)	P-SigH	3.46831470704	22	TTCGAGTCACAAATTAATAGATAGCTCAATCTATGTATAAACTTTAGCTTTATATAGAAAAAATAAAAGGGTTTAAAGCGTATTTGAAGAATATAAATGA	CD1149-CD1153
CD630_11540	1	1352588	4		Transcriptional regulator. PadR family	P-SigA	2.04985995158	49	TTATAGATTAAATATTAATATACAGCTATTTATTATTTTTGAGTCTATTGTAGAATATAAACCTTGCATTATAGAGTACTATGTATTATTATAGTAAATA	CD1154-CD1155
CD630_11570	-1	1356839	1.81	norV	oxygen reductase	P-SigB	4.88275995194	27	ACAAAGTATGATATATTATAAACATAAAACTATTGTTTTACATGACTTATCATGACATCTTTTGTTTCATTCACCTCAAAATGGGGTATGTTACTTATAT
CD630_11570	-1	1356915	2.3	norV	oxygen reductase	TGN-10	2.19241453366	103	ATTATTCACAAAATAGAATAGCTAAAAATATTTAAGAATATTTTCTATTAAATTTTTATTGAAATACAATTTTTTTACAAAGTATGATATATTATAAACA
CD630_11610	1	1361031	2.39	rplU	50S ribosomal protein L21	TGN-10	3.20679034048	187	GTTTACAAAAACATAATGGTAGAATTTAATGATTTTATTTTTGAACAAATAAAAGAATATTATATGGATATAATTGATAAAATTGGTGAAAAATATAATA	CD1161-CD1163
CD630_11610	1	1361138	4.7	rplU	50S ribosomal protein L21	P-SigA	4.53241735955	80	TTCTTTAAACGCAAATAGTACATTAAAGCACAATAAAACCAATGTTATTTTCGATAAAATAGTTGACAATAAAATGTAAATATTTTATAATTAATAATTG
CD630_11640	1	1362247	4.6	obgE	Spo0B-associated GTP-binding protein	TGN-10?	1.79717690217	29	GTAGCAATAGCTGAGTAATATACATAAAAGGAGTGTTGAGGCACTCCTTTTTCTTATAATACTGATGAATTTATAATGGTATTTTTGGTAATGCTAATTA	CD1164-CD1165?
CD630_11660	1	1364048	1.18	hom1	Homoserine dehydrogenase	P-SigA	4.60064215734	226	ACCAACTAAAAGAGCTGTTAGATAATAGTTTATATCCTTTTAGGGAAATAAGTTAAAAAAATAGTGACAATTGGAATAAATTGTATTATACTATTAAACA
CD630_11670	-1	1366292	3.54	recV	Tyrosine DNA recombinase. XerC/XerD family	P-SigE?	1.592	40	ATTTTTCAAAAAATTCTCCTTAATCACATATATCACACTTGTATAAGTTTACTGGGAAATTTTTCCATTATATAATATTTCATTTATATTATATAATAAA
CD630_11690	1	1367875	3.38		Transcriptional regulator. GntR family	box-10		35	TTTTTTTCATAATATCACCTGTAAATTTGAGTTATAAGATATTATATTAAAAGTAATAAAAATATATGAATGTAATGGCTTAAGATATATAATAGATATA
CD630_11750	1	1375284	4	ackA	Acetate kinase	P-SigA	2.46539954166	177	ATTATAACAAATGGGAAAGAATAATCTACATTAAGTTAACTTGTTAATATATTATTAGTGAAATACACAATTTACCATACTAGAAATATGATATAATATA
CD630_11760	1	1376727	2.61		Conserved hypothetical protein	P-SigA	4.42329284921	23	GCTAGAGATACATTAAGATTGGTAAAATAATTAAATTAAACCTATGCCTATCAAGTAAAAATACTTGACAAACAAATGCTAGATTTGTATAATAAATTTG	CD1176-CD1176.1
CD630_11770	1	1377407	1.59	fapR	Transcriptional regulator			275	CCAAAGCGTAAAACGTCTAAATCAAACACAAAAATGAGAAGAGCAGCTAACTCAAAGATGGAAGCAACAGGATTTGTAAGTTGCCCACAATGTCATGAGC	CD1177-CD1184
CD630_11770	1	1377605	4	fapR	Transcriptional regulator	P-SigG*	2.49312566109	77	TACATGTTTTTTTTGTACATATAAAAAAATAAGATGATTTACTAGAGAAAATAAGTGGATTTTATGCATATTAAAAAATAGAAAAATAATAATATAAGTA
CD630_11870	1	1388878	4		Conserved hypothetical protein	P-Sig54	6.99872422448	27	AAGTAAAAAATACAACTAATAAAACTATTGAAAATACTAGATAAATAATAAATAAAAATAATTATAGATTTTGGCATACATATTGCTAATTATAGAGATA	CD1187-CD1189
CD630_11900	1	1391425	7.21		Putative acyl-CoA N-acyltransferase	P-SigA	1.81747112862	29	ATTAAAATATTATTAATTTTTTATTTTAATATAGCCTTAAATTGTTATCAATAAGTGAAAAATATTGTAACAATAGAAGAACAATAGTATTATGTTTATA
CD630_11910	1	1392047	4	fbp	Fructose-1.6-bisphosphatase	TGN-10	3.52575586797	35	TGTTTATACTGATTTAATAGGAATGTCACTTTTATTGGGAATATAATTAGTGTACATTTTATCTCGAAAAAAGTATATTAAGTATGGTATAATTAAAAAA
CD630_11920	1	1394269	9.67	spoIIIAA	Stage III sporulation protein AA	P-SigE	1.68113242724	22	ATCCAAAATAAATGGGTTCACTTTTTTTATTTATAAACATTATTAAAAAAATATAGATGTTTTGGTTATATTCCTTGTCCTTTATAAATAGAATTATATA	CD1192-CD1199
CD630_11980	1	1398222	9.72	spoIIIAG	Stage III sporulation protein AG	P-SigE	3.03112483725	143	ATAAAAGAAAAGAATAATAGTGCAAAAAGTAATAACAGTTCCAATGAAGAAAATAAAAATAATAGTACTAAAAGAGAGGAAGAAAACATAAACTCTAATG	CD1198-CD1199
CD630_12000	1	1399627	2.76		Conserved protein. DUF322 familly			118	GCTAAATTAGAAAAGAAAGATGCAGCAAAAATATTTGATTTAGTTGCAGAACAAGCCAATGTGAAGTATGAAAATATTAAACTTACAAATAATAATAGTA
CD630_12000	1	1399706	7.14		Conserved protein. DUF322 familly	TGN-10	2.38187112435	39	AACTTACAAATAATAATAGTAATAAGTAAAGTATAAACCTCAGAATTAACTGAGGTTATTTTCTTGCAAAGTAGACTTGTATTTGGTATTATTATACTTA
CD630_12030	1	1401258	3.06	xseA	Exodeoxyribonuclease 7 large subunit	box-10	2.19540467608	491	CACAATGTATGTGATACTAATTTAGGTAAAATTGCCAAAATAAGTATTAAAAAAGATGATAAAAGTAAGTTATACAATAATTTTGGATATAATATAGATA	CD1203-CD1204
CD630_12120	-1	1411266	2.94	bltD	Diamine N-acetyltransferase	TGN-10	1.7348393742	30	GTATTTATAATTCCTTTTTCCTGAGAATTTATTCATTTAAAAAGTTTATTTAAAATCTTAATAAGTGATTTTTAATACATAATATGATAGTATTAGATTG
CD630_12130	1	1411366	1.17	spoIVB	Stage IV sporulation protein B. peptidase S55 family	P-SigG	2.48564627515	31	AATCTAATACTATCATATTATGTATTAAAAATCACTTATTAAGATTTTAAATAAACTTTTTAAATGAATAAATTCTCAGGAAAAAGGAATTATAAATACA
CD630_12140	1	1412458	0.97	spo0A	Stage 0 sporulation protein A	P-SigA	2.83767589511	139	ACAAAATAATAAAATTATTGGTGCAATAACTCATGTTTTTAGAGATAATCCGAAAAAAGGATATGGTATTTTTATAGATGAAATGATAAAATTGTAGGTG
CD630_12140	1	1412531	14.12		Stage 0 sporulation protein A	P-SigH	5.71213615488	66	ATAGATGAAATGATAAAATTGTAGGTGAGGCATTAAAAAATTTTATTATTTTATCAATTATCTAGGAGGAATATAATTTTGGAGTGTCGAATATGCTTTA
CD630_12150	1	1413804	2.32		Putative pyrophosphokinase	TGN-10	3.47048472915	30	TAAATAAAAAAATGATGAAATATAGTATTGTAAATGCCAAAGATGCAAAACAAACTTAAAACATTTATTTTATTGTTAAGTAATGCTATAATATAATGTG	CD1215-CD1219
CD630_12200	1	1418353	6.89		Putative hydrolase. NUDIX family	box-10		117	TATATGATGATGAAAAATTGAACTTTATAAAAGAGCAAATCAATTTAAATGGTTTAGACAAAAAGCATAATATAATTTATATAGATAATAATAAAACGAA
CD630_12200	1	1418391	16.64	nudF	Putative hydrolase. NUDIX family	P-SigH *	2.52276946184	79	ATCAATTTAAATGGTTTAGACAAAAAGCATAATATAATTTATATAGATAATAATAAAACGAAAGAGGATTTAGACTATTTTAATCTAAAAGTAAAGAGTA
CD630_12210	1	1419053	3.39		Putative membrane protein	P-SigH	3.2317990557	21	ATGCAAAAACATCTATTGGATTATTATTAGTAAAAGATATGTTTAAAAATTAATATTTATAAAATGAATAACCCTTTGTCCTAAAGCATACTATTTTATA
CD630_12260	1	1424310	4		Putative aminodeoxy-chorismate lyase			110	ATTTTAGAAAAGTGATTATAAAAGGCCTAACATGTCAAAAATAATGTTAGGTTTTTTATTTTTTGATAAACTATAAATTATACCAAAAATATATATTTTA
CD630_12270	1	1425586	4		Putative O-methyltransferase	P-SigA	3.13938594114	85	TACAAAAAAATAAATCATGATTATAAAAAGTCTAACAGGGTAAGAATAATGTTGGGCTTTTTTATTGAAAATTGTTATTCTTAGATTTATAATAAAGAAA
CD630_12290	1	1427634	4		Putative peptidoglycan glycosyltransferase	P-SigF	3.98073721556	17	GATTATATGCTTAGAAAAGTTATAGAAGAAAAGGTTGAAGAATAATAAAAAATTGATAAAAATAGTATTAGCCCCTTAGAAATTGTCAATAATGAAATTA
CD630_12300	-1	1444808	4	sigK	sigma factor	P-SigE?	1.76474269574	69	CAAAAACTTAAATTTAAATTCCCACTCTTTATGTCATATTCCATTCAAAAGTTTGCAAATATATGTTTTAAATTCTAAAAATATGCATATTATTTTATTA
CD630_12300	-1	1444765	4.63	sigK	sigma factor	P-SigK	2.28265787455	26	TTCAAAAGTTTGCAAATATATGTTTTAAATTCTAAAAATATGCATATTATTTTATTAGATAACAGTCAACTTGGATAAGTCTCCTTCATATAATTTAAAG
CD630_12320	-1	1432272	4		Putative lipoprotein	P-SigA?	1.58551973538	90	ATATCTCCTTCTCTTAAATATTTTCACCTAAATTATATAATACTTTTCAGGAAAACATTACCATAAATTTAAAAAGTTATTATTACTTAATATAATATTA
CD630_12331	1	1433865	8.4		skin element	TGN-10	3.17572941774	85	TTATAGATATAGAAACTGGGAAAATTTATAATTAAAATTAGAACTTTTAAACAAGTGTTTTTAATTATATAATTTGCCATAATATGTTATAATATTTTTA
CD630_12340	1	1437244	2.32		phage protein skin	P-SigE	3.40233228701	13	AGGATTTAGCTTTAAAATATAGAATATAAAGTGATTTTAAGTAAAAATTGTAACAATTAAATAAGTATAAGACAAGTTTATGAGTTCATATTTTATAACA
CD630_12380	-1	1441327	4		Putative phage protein	P-SigA ?	1.00225348916	76	TAGCATCATTCATTAGTAGATAAAAAATAAGATGGTGGGGTTAACTTACCATCTTTTTCTCATTTAATATTTGTAATATTTTAGATACTCTTTATACTTG
CD630_12390	1	1442283	4		transcriptional regulator. beta-lactams repressor	P-SigA?	1.56057828701	29	TACTTCTTTTTTATTAATTATTTTTATATAGAATAAATTGGAATTTATATTTATTCCAATCTAATTGATTACATACACTTATTGTTATAAAGTTTAGTTA
CD630_12401	-1	1443927	1.97		Putative phage protein	box-10 ?	1.353920392	96	AATAATAAAATTTTATAATCTATTCAATAATATACTTTTTTCTATAAATATTTTACCTATAACCTTTATTTTTTTATTAAAATGCATTATAATAAAAAGT
CD630_12420	1	1444987	15.54		Conserved hypothetical protein	P-SigF*	2.71556928669	307	AATTTAAATTTAAGTTTTTGTTGTATATATATGAAACAAGGCGAAGAAATTATTGATTTATAAAGTATAAATTGGAATTGAGGTGTCAATAAATATAAAA	CD1242-CD1245
CD630_12460	1	1447533	1.66	efp	Elongation factor P	box-10	1.98837197014	118	GTGTATAGATTAAGAATATAGAGGATAATAATAAAAATATAGAATAAGTAATTTGCCAAATACTTGTTTATATTGTATAACTTATGATATTATGATATTA
CD630_12470	1	1448218	1.5		Conserved hypothetical protein			82	GGAGCAGTTGTTCAAGTTCCATTATTTATAAATACTGGAGATAAAGTAAAGATAGATACTAGAACAGGTGAATATTTATCAAGAGTATAAAAATTTATGT
CD630_12511	1	1455697	4.64		Putative DNA-binding regulator	P-SigA	3.69987889205	47	ATTTCAATGCAAAATCATTTTCAGATGCATTATTTGGTAACTAATGTTCTTTTAAAAATAATGGTTGACAAGAGTGTTGTTATGATATAAAATACAATAG	CD1251.1-CD1253
CD630_12570	1	1459497	7.1	rplS	50S ribosomal protein L19	P-SigA	2.98378192464	78	ATGAAAAATTAATATATATGTATACAATAAAGTACCTATAAATGGAATTAAAAACATAAAAGTGCTTGTAATAACTATTGAAGTATAGTATAATATAAAA
CD630_12580	1	1460224	1.39		Putative GTPase. MG442 type	P-SigB	2.96607627923	49	TAAGAGAACAGTATTATGTAAAGTATGACGTTAAAAAGATGACAATATTATAGTTTGTTAAGATAGATTTTTTAAGTGGAATTAGGATATAATAATATAA
CD630_12600	1	1463854	2.39	brnQ-2	Branched chain amino acid transport system carrier protein	P-SigA	4.71104393062	88	TGATTTTGTTTAATTAAGAAAGTTGTATTAAATATTGTGAAGATTTTATAAATTATGAAACATAATTGACAAATTTAAGTCAAAAATGTATAATTAAATA
CD630_12630	1	1468856	3.42		Putative FMN-dependent dehydrogenase	TGN-10	3.09444991681	34	AGAACACTATGAAGCTATTGAAAAATATGGCATAACTCCTATCCACAGAAAAAGTTTTTTGAAAAATATACTGTAAATATAATATGATATAATGTATATA
CD630_12640	1	1469957	11.63		Conserved hypothetical protein	P-SigH	5.31738763377	15	TGGATGTCAAACTATAAAAGATATTGATGGAAAAGTTATATACAAATAAAATTTTATACAAAAAAGAGGAAAAATCATTTTAATGTAGAATAATTGTACA
CD630_12650	-1	1470961	6.57		Transcriptional regulator. CarD family	P-SigA	4.25819126857	68	TATATTTTTCTCTTTAGTTTCACACATCACCAAGTCTAAACTTTATATTATATATTAATATTTTTGACTTGTCAAGTTATTTATGTTATAATATTAATCA
CD630_12710	1	1476338	1.75		Putative restriction endonuclease	P-SigA	2.22583506448	28	AAAAGAATAAAGTCAATAGAAGTATTTATTAATATTGATGGAAATAAAATCAATCCAAAAACTTGAATAGTAAAATTGTATACTGACAATAATTTAAAAG	CD1271-CD1274
CD630_12740	1	1479369	2.31	topA	DNA topoisomerase I	P-SigA	2.96633451815	125	GATAATATAAGTCTAAATGCCAAGTCTAAGCAAATAATTGAAGCTATAAAAAGAGAAGGAAACTTGCATATAGATAGTATTTGTGATTATACTGGTATAG
CD630_12750	1	1481358	7.92	codY	Transcriptional regulator	P-SigF*	3.7699594301	388	GTAGATTTGGAAAGTTTATGGCTTGTAAAAACTATCCCGATTGTAAAACAACTAGACCAATTATGAATAAAATTGGTGTTAAATGTCCAAAATGTGAAGA
CD630_12750	1	1481735	2.96	codY	Transcriptional regulator			11	TTTCAAGTGTAAACAACTAATAGAAAAATAAATTTTCATTAAATGTGAAAATAATATTAGAAAATATAAAAGGTTATTAAAAGGCCTAAATTTCATGAGG
CD630_12780	1	1484751	4	iscR	Transcriptional regulator. Rrf2 family	P-SigB/ P-SigA	4.567/ 4.033	62	ATAAAAAACTAGGATTTGAAAACATTGGAAAATGGGGAATTTATTCAAAATAAAAAATTAAAATTAATCTTGACAAAATTAGTAGGGTATAATAAAATTA	CD1278-CD1280
CD630_12810	1	1487225	4	mnmA	tRNA-specific 2-thiouridylase MnmA	TGN-10	3.54703576374	22	ATAAGATTCAAATAATAAAGATGATTATTTTTTTAGAAAATAGAACAAGCTATATTTTAAATAAGTACAATACTTGCTCTATATGGTATAATAATAAGTA
CD630_12820	1	1488461	2.4	alaS	Alanyl-tRNA synthetase	P-SigA	1.92663921243	28	ATAAAGTATATTAAGAGTAAATAAAGTTTATAAAATAAATTTATTGTATATGAAAATATAGTATTGATTAATTTTGTAAAATTTAGTAATATAATTAGTA
CD630_12830	1	1490685	13.14		Conserved hypothetical protein. UPF0297 family	TGN-10	1.98116130506	760	CTTTGAAGCGATATCAAATGAAGAATTAAAAGTAATAGAAGAAAAAGTAAATAATGTTATTTTATCATCTTTAGACATAAAATGTGATATTATGAATATA	CD1283-CD1284
CD630_12850	1	1494077	9.86		Putative Holliday junction resolvase	P-SigE	2.20026979419	12	TTTATGATTGATTATGTAAAATTATATGAAGCAGTAAGCCTGTGACCTTAGTTATGATAGGTTCAGAATATGTATTTAATCTATAGAATATAAATAGATA
CD630_12860	1	1494556	2.19		Conserved hypothetical protein	box-10		36	TATGTTGGCAGCAGTAATAATTTTGCAAGGATATTTAGATTTTAAAATAAATTCATAAAAGAACTATAAAATTGAATACTTATGATATATAATATAAATA
CD630_12870	1	1495123	5.11	fur	Transcriptional regulator. Fur	P-SigA	4.98130759816	38	ATAATATATCTTTTATGGGTATATATTTATATTATGAGAATAAATTAAATTTATTTAAATGTCTTGACAAAAAATGAATTATCAATTACAATATTATTTA
CD630_12880	-1	1496508	4		Putative membrane protein	TGN-10	3.50273547079	35	TTATTGTACCATAATTCGTATCATATTTTAAGCTATATTTAAAATACATTTAACGTATTATTTTGACAAACCTATTTTATTTTGATATCCTCTAAATATT
CD630_12890	1	1496612	27.96		Ribonuclease J	P-SigA?	1.4	78	TTAGAGGATATCAAAATAAAATAGGTTTGTCAAAATAATACGTTAAATGTATTTTAAATATAGCTTAAAATATGATACGAATTATGGTACAATAAGAATA
CD630_12900	1	1498542	8.39		Putative small acid-soluble spore protein SASP	P-SigF/ P-SigG	4.243/ 2.25	31	CTTAAGAATTACAAGAGGTCTTTTTAATACTCATTTTAAAAAATATATATATTACATAAAATACCAATTATAACAATCTTTTATTAGTAAAAACTACTTA
CD630_12910	1	1498732	4	dacF	D-alanyl-D-alanine carboxypeptidase	P-SigG	3.13059851905	95	GCAGGAGAGTATGGAATGAATTATGAAGATGCTTTTGAAATAATAGAAAATGCGTCTAATAAAGGTGTTTTAGAAGGTTACTTTAAAAAGCTTGAAAAGA
CD630_12930	-1	1501603	4		Transcriptional regulator. AraC family	box-10?	1.0803941825	123	TTATAATAATTTTAACTTCTAGGCATAAAATTAAAATTTGCTTTTTATTTTATAACTTTTATTATTATATCATATTCATTGTGAAAATATAATAATTACA	CD1293-CD1292
CD630_12940	1	1501750	1.84		Putative membrane-associated peptidase. M25 family	P-SigA	3.36448860322	28	TAAAATAAAAAGCAAATTTTAATTTTATGCCTAGAAGTTAAAATTATTATAATGTAAAATAATTTTGATTATAAGCTATTTAATTGTTATAATAATATTA
CD630_12990	1	1504997	1.02		Transcriptional regulator. MarR family	P-SigA	2.0065080554	88	CCCACTATTTTGTTGTGTACTTTAAACATTTATATCTAATAAGATTTTAGTTTAAAACAATTTAAATAGATAATAAAGTTGATATATAGTATAATTATAA	CD1299-CD1300
CD630_13011	1	1508006	2.86		Conserved hypothetical protein			14	TGTCAAAAAATAAAAAAATTTTTATTTATTAGAGTTTTTGGAAATAATAATAACAGATATTATAATTAATTAACAGTTTTTGTAAGTATTTGACAATAGA
CD630_13020	-1	1508698	4		Putative MazG-like pyrophosphohydrolase	P-SigA	2.38113123582	43	AGGCTGTATTAAGACAAATATAGATTTATTTCACGATTTTTATTATATATGTAAGTTTTTATGTTGAATTTAAAGTTTTTTTTTAGTATTATTTTTGTTA
CD630_13030	-1	1509534	3.41	npdA	NAD-dependent deacetylase. Sir2 family	box-10	1.76395502045	22	TATACATTTTATTTATATTCCCTTTATTTAACTTATTAAACTATATATTTATTTAAATTAATAAAACATAAACGACCTAATATGTAGTACAATTTATATA
CD630_13040	1	1509689	3.99	acd	Mannosyl-glycoprotein endo-beta-N-acetylglucosamidase	P-SigA	2.89143412153	38	ATAGTTTAATAAGTTAAATAAAGGGAATATAAATAAAATGTATACAGAGTATAAATAGACAATATTTACTAAAATAACAAGTTGTCGTATAATTATATTA
CD630_13050	1	1511736	8.48	dnaF	DNA polymerase III PolC-type			29	AATTTAATGTTAACAAAACTTTTATGTTATAATATTAATTCTAAGTAAATATAAGTGAGTAATAGGTAGAAATAGATAAAAAGTGGTAATAATATATATA
CD630_13160	1	1525735	1.61	rpsO	30S ribosomal protein S15	P-SigA	2.7755382546	81	CAATAGATGACTTAAAAAATCAATTGTATAATGATACAAATTATGTGTATGAAAACTATGTTTGCAAAAACAAGTAATGTATGATAAAATGATTAAGGAA
CD630_13170	1	1526280	14.74		Conserved hypothetical protein	P-SigH	4.55710185384	33	ATTATAAAATGAATAATATTGGGTAAGAATATTAAAATAGTATACAAATACATAATCAATTTAAAAGGAAAGACAGGATAAATATAGAAATTTTATAACA
CD630_13180	1	1526910	7.56	pnp	Polyribonucleotide nucleotidyltransferase			373	TTAAAGCAGAGTGGAAGAGTTCCAGTTGCAACTGCTTTGATAGGAAATATGTTAAATATAAAGCCTATATTTTTCTTTGATAATGGGGAAGCTAAGTTGG
CD630_13180	1	1527240	2.86	pnp	Polyribonucleotide nucleotidyltransferase	TGN-10	1.85100861141	43	ATAAGTTGTTCTAATTAGTAGTAATATAAGGTTTTTGCATATATATGTGAAGATAATTTTATATTGTTAATTTATAGTATTTTTGATAATATAGTAAATA
CD630_13190	1	1529627	10.44		Putative polysaccharide deacetylase	P-SigE?	1.22044629501	35	TATTTAAAAGCTGATTAATAGAGAGCTTTATTGATATATATAGAATCACTTAAGTTATATTTAGTGCATAAACAGAGCTTATTTTTAATAGTATTAAATA
CD630_13230	1	1533409	1.68	tepA	Protein export-enhancing factor	P-SigF	3.24269515691	27	TTTATTTAAAATAAACTGTATAATACAATTATTTTTTAATCAAATTTAAGAATTTCATATATATCTTAATATATTTGATTTATTTGGTAAAACTAAATTA
CD630_13240	1	1534209	16.31	ftsK	DNA FtsK/SpoIIIE translocase	TGN-10	3.00855212689	84	AGCACTTAAAAAATTAAGAGAGCTTATAAAAGAATCTGAGGAAGAAAAAAATAATGATTAAAATTTGTTTAAATAATAAAATTTATGATATAATGATGTA
CD630_13280	1	1539862	2.81	recA	Protein RecA	P-SigA	4.39357970775	48	ATTAATAATGGTTTATAAATAAAATGTAATGAATAAAAATATAATCATTAGTAGCGTTTTTAAATTGACTAGGTTTGATTTATGTTATATAATTAATATA
CD630_13290	1	1541046	1.4		RNase Y	P-SigA	3.76315067823	86	AGAAGAATAAGTAAAAATACAAAAAAATAACTAGTAATTAAAGACATGCCACGCTCCCTATTAGCTTGACACAATGTTGAAAAAATTATAAAATTAAGTG
CD630_13300	1	1543286	4.43		Putative DNA helicase. UvrD/REP type	TGN-10	3.51359263242	22	AGCAGTTTTGTATTTATTTGTATTTATTTTGAATTTATTTACTAAATTTGCCTATAAAAAGTATATATAAAAATATAGTTCAAAATGGTATAATTAAGTA
CD630_13320	-1	1546595	5.8	uppP1	Undecaprenyl-diphosphatase 1	box-10 ?		30	ATGAAAATATCAATCTTCCATTGTGCACTACACAGTACTATGGTATTATAAGTTAGTAAAAGGTGGCATTTTTTTATTAATCTATGAATAAAATATGCTA	CD1332-CD1331
CD630_13390	-1	1555834	2.24	aspB	Aspartate aminotransferase	TGN-10	2.04909712521	76	TAAACATGGGTATTTTACTATAATTTGTTAAAAGTTTATTTTAAAGCTATATTAATTTTTTTTGATGATTTTTACCCATAAGTATGTTATTATTATCTTG
CD630_13400	1	1556115	9.93		Putative galactose-1-phosphate uridylyltransferase	P-SigK	2.79351418036	28	TTTCAGCTATAGACAAAATATATAATAATAAATATGCAAAATTATAAAAAATATTATAAATTTATTTAACAGATACGATAAATATCATATAATTATATTA
CD630_13450	1	1562468	2.42		Transcriptional regulator. PadR family	TGN-10	2.55777871882	66	ATCTGATTAGAGTATTATACATTTATAGAAGGATTTAATCAACAAGAATATTTAAAAATAACTATTGTGCAGAACATAGTACTGTGTTATTATGAGGATA	CD1345-CD1347
CD630_13480	1	1565074	10.22		Putative lipoprotein	TGN-10	4.05864624404	26	AATTCAAATAGCTTAGAATTGTAAATAATTTACTATAATAATTCATAAATTGATTTAAAAGTATAAAAATATAATCTATACTATGGTATAATAAGTATCG
CD630_13530	-1	1570410	3.84		Putative phosphomethyl-pyrimidine kinase			53	TGTCCAATATTAAAAATTAATTGTATCAATACACTGTTTTTTTTACAATTTTTTATTTTATAATCTACTTTTTTCTTTTTTTTATAGTAATATATATGTA
CD630_13540	1	1570520	2.96		Conserved hypothetical protein	P-SigA?/ P-SigF?/ P-SigG?	1.52131812065	88	TACTATAAAAAAAAGAAAAAAGTAGATTATAAAATAAAAAATTGTAAAAAAAACAGTGTATTGATACAATTAATTTTTAATATTGGACATAATAAAATAG
CD630_13550	1	1571873	4.45	cspB	Cold shock protein CspB	P-SigF*	2.72744004677	72	GAAAAATAAAGTGTAAAAGATAATAATCATTTAAAATTATAAAGTAAAAAAATTGATTATTAATGTATAAAAATAATAATAATTGACAAACATAGCTATA
CD630_13550	1	1571891	3.88	cspB	Cold shock protein CspB	P-SigA	3.56133756093	54	ATAATAATCATTTAAAATTATAAAGTAAAAAAATTGATTATTAATGTATAAAAATAATAATAATTGACAAACATAGCTATATATGATAGAGTAGTAATA
CD630_13560	1	1572404	7.13		Putative CBS domain-containing protein			162	TGTAGAGTAAAATTATTATGGCTAAGTTTAAGTCAATTAATTTTTAGTAAATTTTCTAAAAAGAGAATAAGTGATACTGATAGACCATATAAAAATATTA
CD630_13570	-1	1573940	4		Putative peptidyl-prolyl isomerase	P-SigA	1.93131231464	48	TTAATTGTAATAACTTTGTTCTACTAAATTTAATTCTATTTGACTTAATATGGCTTTAAATATTAGACATCTACATTATTTTCTGATATTATTTAAGATG
CD630_13600	-1	1575517	4.92		Transcriptional regulator. Phage-type	TGN-10	3.29549516125	16	ATATAGAATTATTTGTTCTTTATCAATATATTTTAGAAAAAAATATTCTTTTATATTTTATTAGTTTTATTTTTTAGAACAATTTGTTATAATCTATACA
CD630_13760	1	1593403	4		Putative phage protein	P-SigA ?	1.35655608956	47	TTATTTATTCAATCTATAAATTACACCTACAATTTAAAGTACAGAAGATTAAATTGATAATCCTGAAAATATAATATTGCATGATGTAAGAATACAACAA
CD630_13810	-1	1599901	4		Transcriptional regulator. TetR family			48	ATATAATAGATATTTAGTAAGAAGACACTTATTTTCTATCATATCTATATAATAATATTATACATTATAGCTTACATATTGATTAATAAATTTTAAAGGA	CD1381-CD1380
CD630_13820	1	1600009	4	glpK2	Glycerol kinase 1	P-SigA?	1.26658397216	88	ATTTATTAATCAATATGTAAGCTATAATGTATAATATTATTATATAGATATGATAGAAAATAAGTGTCTTCTTACTAAATATCTATTATATTAAATTTGT
CD630_13820	1	1600072	3.18	glpK2	Glycerol kinase 1			25	GTGTCTTCTTACTAAATATCTATTATATTAAATTTGTATTTAAGTATGATTATTTATTGAAATATGTGATATTAAATTTTTCTTTTTAATAAATTAAATA
CD630_13870	1	1605712	2.18		Putative allophanate hydrolase subunit 2			15	GCTTAGAGCTGGAGATTTTATAAAATTTGTTCCAATAACATTAGATGAATTTATAGAAATCGAAAAAAATAACTTAAGTATTTAAATATCGTTATAGTAC
CD630_13920	-1	1612776	3.81		Putative endoribonuclease	P-SigA	2.10876804513	69	TAACTAATAAATCTTTTCAATTAATAACAATAATAATTATAGCTAAAAAGTTATATGTTTTTATGGATTATTATCAGAATATATAATATAATTTTATATA
CD630_13940	1	1614075	6.56		Putative NAD(P)-binding oxido-reductase. GFO/IDH/MOCA family	box-10		32	ATATTAACTTATAACAGCAGTTAAAATTGAAAAATTATAACTGCTGTTTCTTTTATTAAAAATATCCAAATGTCTGTAAAAATAGACTATAATAGAGTAG
CD630_13960	-1	1616835	3.7		Putative amino acid amidase			92	CATCAGATATAAAAAACTATATAAATAAATGACACATAGTGTTATATTTTTTTATACCAATTTAGTTATTTTTCAGTTACAGATTTAATAATAGTTAATA	CD1396-CD1395
CD630_13970	-1	1617819	4		Conserved hypothetical protein	TGN-10	2.88463431463	34	ATACTCCATGTAAAAAATGTATTATCATTCTAACTATTAATATTTTTATTTATTATTTTATATTGACCCTCACATGATGTCATGTTATACCCTAAAATTA
CD630_13990	1	1619165	4		muramoyltetrapeptide carboxypeptidase. S66 family	box-10	2.05635786527	53	CTAACTATATTAAAAATTTATTTTTCTTCATTAATTATATTATTTTATGTAAATCATTATTATGTATCAAGTACAAATAAAATATCTTATAATTATATTA
CD630_14000	1	1620123	2.64		Conserved hypothetical protein	TGN-10	3.65911052562	29	TTTGGGCAGAATGTGCGAATTAGATGCTACAGAAAAAATCGTTAAATTAAAAAAATAGTGTGTATATAAATATAATAGAAATATGGTATAATCTTATACA
CD630_14010	-1	1621652	3.45		Putative isochorismatase	P-SigA	4.09804475924	23	AGATATTGCTTCAAATCTTTTACACTCAAAACAATACAGCTAATTATACAATAGTTTGTACTCCTTGACTTTTATATAATTAATATGTACAATTTTATTA
CD630_14020	-1	1622499	1.41	glpQ	Glycerophosphoryl diester phosphodiesterase			59	TTATAACACATATATGATTTTATTTTTCTACATTTATATAATATATAAATTACAAATAGTTATTTAACTAATATATAACAATACCTTTTGGAATATGATA
CD630_14030	1	1622975	14.47		Putative synthetase	P-SigE	2.66178221716	-204	TCTGATGAAGTAGTAGATGAGGTTTTTAAGATGAATATTGAGAAACATGAAAGGTTAATTCAATATTCTAAAGTGAACAATATTAGCATAGACTCTATCA
CD630_14040	1	1625347	31.27		Putative oligopeptide transporter	TGN-10	3.09606303916	24	GAAATTAATAATATAGGGTTAAATTTTAGTAGTTTTGACTCGCTATTTGTAAAATAATAAAAAGTTAAGTTTTATATGTATATATGTTATAATATATACA	CD1404-CD1404.1
CD630_14090	1	1633265	4.49		Putative competence-damage inducible protein. CinA family	TGN-10	3.34198173532	49	TATATTATGTGTGGTTTTAGAATAATAATCTAGTTTAAAGATATGTTTAAATGATTTTTTAACTTTATTTATGTTATTATTTTTGCTAAAATTATTGTTA	CD1409-CD1410
CD630_14130	1	1637997	1.82		Putative membrane protein	P-SigL	5.64277706824	36	AAAAAATTGAAAATTTATTAGTATTATTGGAAAGACTAGGGTTTTAGAGTCGATATATATTGATTTAAGATGGCATAGTTTTTGCTTAAAAAGAAGAGTG
CD630_14150	-1	1640871	4		Putative membrane protein	TGN-10	3.39010478435	21	TAGAAGTTTATGATACAACCTATTAATTAATTACTAAGTATAGTTTAATTTTTATACACTAGGCTTTATTTGGATATGAATTTCTGTTATAATTGTTCTA
CD630_14160	1	1640973	14.62		Putative membrane protein	P-SigE	1.93940960472	29	AACAATTATAACAGAAATTCATATCCAAATAAAGCCTAGTGTATAAAAATTAAACTATACTTAGTAATTAATTAATAGGTTGTATCATAAACTTCTATTA
CD630_14170	1	1641481	1.11		Putative ATP-binding protein	P-SigA	2.47762743208	16	CATAGGGGTTATACTTTTAATATTAGGGGCATTCTTTATAGTGAATTAACAATTTAATATAATTTGCTATGCAACTCAAAAATTTGGTATAATTATGTTA
CD630_14190	-1	1648110	4		Putative diguanylate kinase signaling protein	box-10		33	TATTGTTTCAGTTCTTTTTTGTTAAAATTAACTTATTTAACAAAGATATCATAGTTTAACAAAGCTTTTAATTTAAATATATTGATGTATAATATAATTA
CD630_14240	-1	1653925	6		Conserved hypothetical protein	P-SigA	1.91928735293	158	AGTGAAAAATAGATTTCATATTGTTAAGATACTGTTAAATATTTCAATTTTCTGACAAGTATGTTGAACAATAACTTATCCTAGTGTATTATTTTAGTTG
CD630_14250	-1	1654969	2.94		Putative magnesium transporter	P-SigA	2.26020884048	23	ATACGTTTATACATTTTATATTCATATATAACTATTATATAAATTTTAAACTTTACTATATTCACATAAAAAATGTAGTATTATAGTATATATAATATTA
CD630_14300	-1	1658355	2	pdaA	Putative delta-lactam-biosynthetic de-N-acteylase	P-SigG?	0.888	22	ACTTTATATCTTACAGTAAACTTCTTTCATTTATTATTTGTATATGTGAATATTTTTAACTATAAATATTCAAACTATATTATAAGAAATATATTTTAAA
CD630_14310	1	1658504	4		Putative helicase. DinG family	TGN-10	2.47107548488	50	TTCACATATACAAATAATAAATGAAAGAAGTTTACTGTAAGATATAAAGTTGATATTAATTATCTTAAATAAAGTGTATATAAATGATAAAATATAAAGA	CD1431-CD1432
CD630_14330	-1	1664675	12.48	cotE	Spore coat protein CotE; peroxiredoxin/chitinase	P-SigK	2.9036665904	20	ATATTAAATCTTTTTAATAAATATCTTTTTTTGACATAAGGATTACTTAACTTTTAATAAAATAGTAACACTAATATGTATTAATTAATAGAATAAAATA
CD630_14340	1	1664837	9.99		Conserved hypothetical protein	TGN-10	2.60712694358	33	ATGTCAAAAAAAGATATTTATTAAAAAGATTTAATATTTTCCTAATATAAATGACAATAGTAATTGCTATTTTTTTACTAATTTGGTATAGTAATGGATA
CD630_14360	1	1666788	1.77		Putative hydrolase	box-10		40	TATCAGAAAATGGACTAAATGAATATTAATAATATTAAATTAATATATAATTAAAAAGTTTTTGGGGTTTTAAGGCGCATTATGTAGTAATATAATAATA
CD630_14410	1	1672140	4		Putative membrane protein	TGN-10?	1.64278055938	110	GATGATTTGAACGTTTTTAAAGATTAGAATATAAAAGATTGCACTAGACATATATGAAAAAGATAATATAATAGATGATGTAATAGATGACAGTTCAAGA
CD630_14420	1	1673311	1.62		Putative MORN repeat-containing protein	P-SigA	2.21594679328	47	GATTTGTGTATCACTTTAAAAGATATCATTTTAAAATTAAAATTGAAAAAATTACTTAATATGTAGAAAACATGACCACTATTAGGATATAATAAATTTA
CD630_14510	1	1680637	3.65	folB	Dihydroneopterin aldolase	P-SigF*	3.71781054114	376	GTTTGGGGTCTTAGAAAAGATAAAAATATGGCTTCTGTAATAGGAAAATATGATGCAGAAGTGTGTATAATGCATAATCAAGATGGGACAAACTATGACA
CD630_14550	1	1684639	2.16	sigA1	RNA polymerase sigma factor SigA1 (sigma-43)	TGN-10	2.23730068482	61	GAAAAAACTCATTAGAAGAGCAAATTAATAGCTTGTTGAGAGAACAACAAGAATTAGAAAATAATAATGATATGAAAGAGGTAGATGGTAGAGTTATGGA	dnaG-sigA1?
CD630_14560	1	1686009	4		Putative SAM-dependent methyltransferase			28	GAGATAAGTGATATCTCATGGCTATTTTGTAGTAAAGATTTAATTTTATTTTTGTAGTTATTTCAGTCTAATATCTATAACTTGGATTAAATCCTATAAA	CD1456-CD1457
CD630_14570	1	1686252	2.68		Conserved hypothetical protein			488	AGTACCATTTGCAGTGCTAGCGGATGTTAATAAAGGACCTCTTGACAATGCACATAAAGAAGTCATACAGAACAATCTTTTAGATAAAGTTGATTTACGA
CD630_14580	1	1687863	3.46	wrbA	Putative flavodoxin protein			34	GATTTTTAGATGAATTTAGTGAAATTGAAGTAATAAAAAGTAATGTATATTTGAATCCATTTAGTACTATTTAGCAGTGTTTGATAATAAAAATACTATA
CD630_14590	-1	1689027	18.78		Putative FMN-binding protein	box-10 ?	1.34111134762	28	TAGCTTCTCTTTCACTACCTTTTATCTTAAACTATATTTTTTTCTTAAAATTTGTAAAAAACATAGCATAATCTTTATAAATGTTCTAAAATTTAATTTA
CD630_14600	-1	1689932	3.08		Putative phosphohydrolase. HD superfamily	P-SigB	2.70925190296	71	TTACTTTTAATTTTTTCATTGTTTAGCCTAATAAAATCTCTCTTACTTTAAAATACCATAAAAGGTATCTTACTTGTATTATTGGGTATTATATTTTGTA
CD630_14630	1	1691613	3.18		Conserved hypothetical protein	P-SigG?	1.20410671406	33	AAAAATAATAACAAACACAAAATATAAGTTTATATTTTGTAAAAATTGTAATTTAAAAAATAACATAATTTTTATTAAAATAATACAGATACTATTTATA
CD630_14640	1	1692311	4		two component system	box-10		66	ACTTACATTTTATTTTTATAAATTTTAATAGCTCTTTGTGACTATTTTGTAATTTTAGAAATATTTTAGTATCCAGGGTAATTGTGTATAATAAAACTTG
CD630_14690	-1	1702360	4	cwp20	Putative cell surface protein penicillin-binding protein	P-SigA	2.54873736321	32	TATATTTTTCTCTGTTATATAAAAAGCTATACTTATAAAAGCTTTTTTTATTGATAATAATCTGTTGATTAAAATAATTAAGAATGTTATGCTAATTATA
CD630_14700	1	1702463	4		Putative rhodanese-like domain-containing protein	P-SigG*	2.85215035018	71	ATTAGCATAACATTCTTAATTATTTTAATCAACAGATTATTATCAATAAAAAAAGCTTTTATAAGTATAGCTTTTTATATAACAGAGAAAAATATAAAAA
CD630_14740	1	1708685	4.73		Putative rubrerythrin (Rr)	P-SigB		633	ACGGGAAGTGGAAAAACAACTATTATAAATCTAATTACAAATTTTTATCATATAGATGAAGGAAGTATATTTTTAGATGGTAAGGATATATACTCTATTA	internal CD1473
CD630_14740	1	1709263	1.37		Putative rubrerythrin (Rr)	P-SigB	5.00406483	55	TTATTATAGAAACATATTATTGACACAGGGAAAATAAGTATTTAGAAAAAACTTTTAAAAAAATTGTTTAAAGGTATATGGTGCGGGTATATATAGACTA
CD630_14750	1	1710094	11.98		Putative hydrolase	P-SigA	2.47831879656	32	ATAGTAATAATGCACAACTTTTAAAAATAAATGATTAATCCAAAAATAAATTTGATTTTAGAAAAGTAAATTGACATGTAAAGAAGAATATATTAAACTA
CD630_14760	1	1710999	4		Putative signaling protein	P-SigA	3.51401117094	59	ATAGTGTATTTAAATAGATAATAATAAATTTATTATAGTTGAATAAGAATATTATATGAGAATATTGCAATTTGATATATTTACCATTACAATAAAAGTA
CD630_14770	1	1714144	5.1	feoA	Ferrous iron transport protein	P-SigA	2.96029869511	132	TTTTACGATTTTATTAATAAAATAAATCAAATGAGAAAAAAAATCAAAAGAATACAATAATCACTTGCAAAAAATATACTATTGTGATAGACTTAAATCA
CD630_14810	1	1717283	5.22		tryptophan RNA-binding attenuation protein	P-SigA	2.75065971492	53	AATTGCTTTATTATCAGGTTCTTATTTTTTGTATAAATAACAAATTTCATATTTGAAGTAGGTTAGACTATGCTGTAATTTTACTGTATAATTATATATA
CD630_14840	1	1719555	5.9	ssuA	ABC-type transport system. alkanesulfonates-family	P-SigH	4.56263928283	71	TAACTCACAATATTGAAGAAGCTATGGAAATAGCAAAGAAAATAATTGTTTTTAGTAAAAATAAAAGGATTAAACAATTTAGTGTCGAAGATGAATATAA	internal promoter operon CD1482-CD1484
CD630_14860	1	1721501	1.4		Putative ribosome recycling factor	P-SigG	1.91961585773	57	TTTTTATTTAATTATTTATTCATTATGATTTCCAAAAAAATAAATTATAACTTGTTTAATTTTAGTAAATAAAATATAAAAATATAGAAATACTAAATTA
CD630_14870	-1	1722815	3.01		Conserved hypothetical protein			21	CTCTTGACATATTTATACTCCTAATTTAAATATAGTGACAATAATTGTCACTATTATATGATAAGATATTCTTGCATCTAAAGCAATAATAATAGTAAAG
CD630_14890	1	1724103	1.75	metN	ABC-type transport system. methionine	P-SigA	4.36557353615	248	TAGAAAACTAATTAAAAATAGTTAATTAACGATAATAAAAAATAAAAAATTTAAATAAATTTATTGACAAATACTATTAATGAATATATCATATATAACA
CD630_14920	1	1726902	4		Sensor histidine kinase. associated to Spo0A	P-SigH*	1.96530387069	29	CAAAATCTACAAAATGAGTAAAATTAAAAATATTTACTCATTTTTTTTTATAACTAGAAAGTGACAAATTTTTTGGAAGAATTGTGGTAACATATTTATA
CD630_14930	1	1729515	2.44		Putative 3-methyladenine DNA glycosylase			272	TAAATGATATATTTAATCGATTTAAACAAATTGAAAACAGTGGTATATCAAATGAATTTGGAAGTGGTATAGGTTTATGCCTTACAAAATCATTGATTGA
CD630_14940	1	1730957	3.92		Transcriptional regulator. HTH-type	TGN-10	3.53171155259	323	ATATATATAGTATTAAACTCTAAAATAAAATATGTTGTAGAGTAAAAAAAGACATTGAATAGATATCATTAAATTGTAAAATTATGTTATAATTGTACTA
CD630_14970	1	1734185	4.89		Conserved hypothetical protein	P-SigA	2.7905193583	45	ATTACAACTTTGTAATAAAAAAGGGAATATAAGGAAGATAATAAAAAAATAATTTTTGTAAGAGATTGAAAAAACAATTAATGTAGTATACTATAATATA
CD630_14980	1	1734856	1.04	sigA2	RNA polymerase sigma factor SigA2	P-SigH	4.50001741224	135	AGACATATATCATTCAAAAAACTAAGAATATAACAACATATAATAAAATAAATTATATATATAAGGAGGATATTGCTGTTAGAAGTAGAATAATATTATA
CD630_15020	1	1739800	4	deoC	Deoxyribose-phosphate aldolase	P-SigA?	1.65540454731	17	CTACTAATGACTATTTTTAAAGTTGAAGAGGTTGATATGATACTGAATATTGCAAAAAGAAAATTGCATTTAAAAAAGTAATCTAATTATATTAATTATA
CD630_15060	-1	1744146	4		drug/sodium antiporter. MATE family	P-SigA	2.25882929286	26	TAATTTATCTTAATATGATTTTTTGTTGATTTTAAGCTGTTTATCGTATAAATAAAATTTTTCTTGACTATATAGTTACTATATAGCTTATTATATATAG
CD630_15090	1	1745278	6.94		Putative lipoprotein	P-SigF*	2.81319642687	872	AATACAGTATTAACTAAAGCAATTATGATTTGTCTTGAGTGTATTGGTATTGGTTAGGAGAAGAGGAATGAAGTTATTATCTAAAGTAAATAATAATATA	operon Cd1507-1509
CD630_15110	-1	1748867	4.2	cotB	Spore outer coat layer protein CotB	P-SigK*/ P-SigE	1.71737009508	30	GCCCATAACTTAATAAAAACTGTTGATATTAGTAGCAATTGAATTTAGTTAATTTATTTATAATATACATAAATTTAAATATTACGAATAAAGTATTATA
CD630_15111	-1	1749922	2.57		Conserved hypothetical protein	P-SigA ?	1.89083567565	71	TTTCTTTTAAGAATGAAAGTTTATCCAGTTTTGCGATTATAATAACCAGTTTTACATATCCACTTGTAAAATATATCTAAGCAATATATCATACTATATA
CD630_15150	1	1753394	4		Putative diguanylate kinase signaling protein	P-SigA	2.75832581744	132	AAAATTTAATATAAGAGAGAGATGTATTATGTAATATTAATTTTTTTTAAATTGGTAATACTATATTGCTGTATTTTTTTTTATCAATTATAATTTAAAA
CD630_15160	1	1757459	4		Transcriptional regulator. MerR family	P-SigA	2.3664721015	33	GACATCTAACTGATATTTAAGCTTTAAAATCAAAACCATATTGATTTTCTAAAATAATAACTACTTGATTTAGTAAATAATAAAGAATATAGTAACTATA
CD630_15180	-1	1760860	4	feoA	Ferrous iron transport protein	P-SigK	3.1080249653	44	CCAAAAGTAAGAATTATACCCAACTTTGTATGATAGGCATCTTGCCTATCTTTTTTTTGTAAAAGTAACAAGGTAATAATATAATGCATAGTTTAAAATA
CD630_15190	-1	1761620	4		Putative acyltransferase	P-SigH*	3.61308759809	37	AGTTTTGTTTTTAATATAGTATATCACTTTTTAAAAATATTTTTAATAAATATAAATTTTAATAAAGGTATTTATGTTAAAAATGGTATAATGTATCTTA
CD630_15220	-1	1765393	2.96		Putative polysaccharide deacetylase	P-SigA	2.63619045095	42	TTAATATTATGCAAATAATGTCATATAAGTTACACTTTAGTTATCTTAGTTACAACTTTGTCGGTTTACTTTTTCTACTTTCTTCGATATAATTATAATA
CD630_15230	1	1765613	1.19		Putative transporter	P-SigA	2.03752257616	154	ATCTATAAAAAAATTTAGTATAGGTAAAAAAATATAAAAAATATAAAAATTTATTAAAAAGGTGTTTACAAAAAATGATTAATATATTACTGTTAAATAG
CD630_15240	1	1766784	2.62		Putative rubrerythrin	P-SigA	2.42841559684	120	GACAACTATTTCCTAATTAATCAAATAAATTATGTATTATGTAGAAATTTGACATCAAAACTTGGTTGATACTGGTGTTTCAAAGTGATAAAATTAATTA
CD630_15240	1	1766842	1.62		Putative rubrerythrin (Rr)	P-SigB		62	AACTTGGTTGATACTGGTGTTTCAAAGTGATAAAATTAATTAGGAAATAAATTTTATTTTTAGTGTTTAAGCTATAAAGTCTGGGGTATATATATTCTTG
CD630_15310	-1	1775296	1.13		two component system	P-SigA ?	1.39187492179	35	GTTTAAAATATAATTTATCAAGTAAAATATAGTTATATTAATATAATTATTTTAGGTAATAAGGTAGAAATATTTTAATTTATCAAGTAGAATATAGTTA
CD630_15310	-1	1775379	4		two component system	P-SigA	2.1254362726	118	GGCTTTTAAACATTTAATTATATTAATTTAAGGTTACATTTTCGTAAGTATTAATTATATTTCTTCAAATTTATTGCAATTATGTTTAAAATATAATTTA
CD630_15320	1	1775502	4		ABC-type transport system. ATP-binding protein	box-10		47	CAATAAATTTGAAGAAATATAATTAATACTTACGAAAATGTAACCTTAAATTAATATAATTAAATGTTTAAAAGCCATTTTAATATATATAATATATTTG	CD1532-CD1533
CD630_15340	1	1778424	5.15	ggt	Gamma-glutamyltranspeptidase	box-10		41	TTAAGATATTTATTTAAAGATAAAATTAAAGTTAGGAAAAAGTCTATATTTTATATCATTTTGTATCAGTTACATTACTTGATGTTATATAATAAATCTA
CD630_15350	-1	1781123	4	sseA	3-mercaptopyruvate sulfurtransferase	P-SigA	1.69733224248	61	AATTTTCAATATTCATTAATTATTTGAATTTTTATATAAAATTTTTACAATTTCTAAAGATTTATTTACTTATGTAATAAATTATAATAATATTAGTTTA
CD630_15360	1	1781242	4		Ferredoxin-NADP(+) reductase subunit a	P-SigA	1.94183846072	446	TTATTACATAAGTAAATAAATCTTTAGAAATTGTAAAAATTTTATATAAAAATTCAAATAATTAATGAATATTGAAAATTTTAGATATATAATAAAATAA
CD630_15360	1	1781436	8.07		Ferredoxin-NADP(+) reductase subunit a	P-SigA	2.35516589625	252	CTAAGTTAATTTATTAAATAAATAATTGAATAAAAAAATTTTATTATGTATTTATAAAATTTTTGTTACAAATTTGGCATAATATAGTATACTTTAAGTG
CD630_15410	1	1789376	2.82		drug/sodium antiporter. MATE family	P-SigF*	2.49553478918	76	CTTTATTTTTACTTATTAAAAAAAATTTATACTAGAAAAGTTTGGTTTTTTGATTAAAGTGGTATATAATAGATATATAAATTAATATTTAAAAAGTAGT
CD630_15420	1	1790909	1.34		Conserved hypothetical protein	P-SigA	3.10126041941	41	AAATGAAAGACTAAACGAGATAACTACTGAGTAAAAATATAAATTCAGATAATTGAGCAAGAAATTGCAAAAAATACGATTATATGATAAAATAAAACCG
CD630_15430	1	1792456	4		putative FMN-dependent NADH-azoreductase	P-SigG	3.25433719524	23	GAAGTAATGTGTATAAAAACATAAGTTACATTCTGTAATAATAGTTATTTTATAATTCAACAAAAGAATAGAATGGGTATATTTGTGAAATAATAATATA
CD630_15431	1	1793192	19.7		Conserved hypothetical protein	P-SigH	5.61653530002	16	TGAAAAAATAGATGGTATAATAGATGGGATGAAATTTTAATTATAATATTTTATTAAAAATATAAAGGAAAAACCTCTTTTAATGTAGAAACTTATATTG
CD630_15450	-1	1794136	6.63		Conserved hypothetical protein. DUF1836 family	P-SigB/ P-SigA	2.896/ 1.271	13	GTTTTGATTACTATATTATATATTTAATTATACCACTTTATGTTTTTTTTACAAGCCTTAATATTGTTTTACTTTCTAATTTAGTGTATTATATATATTA
CD630_15461	-1	1795295	2.44		Conserved hypothetical protein	P-SigA	2.28324206014	24	ATCTTTACCTAATTTGGAAATTTTATGTATAAAAAATGAAATTTCGGGAAAAATTGTAATAATTTAAAAAAACTTATTAAAATATAGTATAATAAGTATA
CD630_15461	-1	1795334	4.27		Conserved hypothetical protein	P-SigF*	3.70415524887	63	ATTTTATATGTAACTTTTGTTTATACAATAAAAAATTTAATCTTTACCTAATTTGGAAATTTTATGTATAAAAAATGAAATTTCGGGAAAAATTGTAATA
CD630_15470	1	1795496	8.64	hisZ	ATP phosphoribosyltransferase regulatory subunit	P-SigA	3.64315933206	303	AATTTTTTATTGTATAAACAAAAGTTACATATAAAATATTTTATTCAATTTTTTAAATAACTATTGCCAATTTTTGAAAAATATATTATTATTAATAGTA	CD1547-CD1554
CD630_15550	1	1802582	2.22		Putative amino acid permease	P-SigL*	6.63989729062	37	AATAAAAGATTACGAAAGCTAAGTAGAGTTTATTTTATTTTAATAAATAATAAAGCTATTTTTCTATATATTGGCATAATATATGCTTATTTAACTATGA
CD630_15620	1	1809563	3.13		Conserved hypothetical protein			76	ACAAAAATTGGATTGACTTACGAAAAACTCATGAAAAAAGGTTTTAAGAAGGAAGAATTATCAAAAGTACATGCACCAATAGGCATAAAATTGAATGCTC
CD630_15670	1	1814395	5.06		putative manganese catalase	P-SigF/ P-SigG	4.21/ 3.64	26	TATTTTTTCAAATAAATCAATGACTATATAATTGAGAACTTATTAAATTTTAATTATACAATTTGGAATAGTATTACAACTTAAGTAAATAATAATTTTG
CD630_15680	1	1815249	2.09		Conserved hypothetical protein	P-SigF*	3.82064162193	23	AGAAGAATTAATTATATGAAAAATTAAATATGTATAGTTAAAAATGGGTATACACTTATTATAAGTGTATATCTATTTGTTTATTGCAAAACATATAATA
CD630_15690	-1	1818102	4		Transcriptional regulator. MarR family	P-SigA	3.47559161512	37	ACAATAATTTAATTAATTAATAGTTACATAAAAAAGTAATACTTTAATATATTTTGACACCATATTGACATTAGAATTAATTCATGATATTCTGTTTTCG
CD630_15710	1	1819432	4	tlpA	Transposase-like protein A		2.65433888794	78	GATAAAAGTTAAGACTTACGGTTCTTATATATGTTATTTAAAAATAAATATAAAAAACCTTCAAAATACTTGTTTTAAGTAATTGCATATTTTAATATTA
CD630_15740	-1	1823848	4		Conserved hypothetical protein	P-SigA	3.15102067632	38	ATCTCTTAGTCTATGAGATATAAACATAAATAAAAGAAAGAAATGACACTCAACTTAAAACACATTGTATGCAAATACTGACTATGGTAAAATGAACTCA
CD630_15750	1	1824103	5.69		Conserved hypothetical protein	P-SigE?	1.93349995631	63	GTATATTTATGGACTTTTCTAGGTCTAAAAGTAATCTTAATAATTTTAGAAGTTACAAAAAAGTTACATAAATTTGGAAAGCTATAATATACATATATAA
CD630_15760	1	1825018	8.33		Putative esterase. SGNH hydrolase-type	P-SigA	2.43672143	55	GCTTCAAATTGGGGAAGGAAAAGTATAGATATATATCTACATTAAATTAGTGAATAGAATAACTTTACTTGAAGGACAAAAAAGTATAAAATATGAATTA
CD630_15770	1	1825654	1.78	pgm	Alpha-phosphoglucomutase			75	AGGATATAAAAAATTATATTTTGATGGGTTACATCCAACCAAAGAGGGTCATAGAATAATGGCAGACATTTTTATTAATTCAATTAATAAGTATATAGAA
CD630_15780	1	1827497	3.76		Putative membrane-associated ribonuclease BN-like (Rbn)	P-SigA?	1.50492193009	143	TAGATGACATGGTCGAAAAATTAAAATAAAATATTATTATTTTATAAGATAATTTTGTAATAATATTTATTTAGCTGAAAATTATAATTTACTTTCATTG
CD630_15790	1	1829848	10.93		Sensor histidine kinase. associated to Spo0A			-852	TTTTATAAAGATGTGTATGGAAATTATATTGGATTTAATTCAGGTTTTTTGAATTTAGCTTGTATGAATAAAGAAGAATTATTAGGGAAGAATAGTTATA
CD630_15800	1	1830921	1.11	hom2	Homoserine dehydrogenase	P-SigA	4.2378288096	640	AAAATTAGAAATAGAGTTCTCGGATTTATAAGTTTAAATATAAAAAATAAAATTTTAAAAAAGTATTGACAATTGATTTAGAAGGGTTTAAAATAAATTA
CD630_15830	-1	1835932	4		Conserved hypothetical protein	TGN-10	3.01418485812	24	TTATAATTAGAAATGTGTCACGTTTTATGCGTGGCACATTTTTATTCTAAGAAAGAACATGAGGTTTTTCATTCATACCTATATTGTTATAATTAACTTA
CD630_15831	-1	1836496	3.01		Conserved hypothetical protein	P-SigA	3.30686433326	201	AGTTTGATGATATAAATACATATTATAGTATTGACTATAATAAAATATCCTCATACAAAGACAGTTGCAATTATCTATCTGAATATATATAATAAAAATG
CD630_15900	1	1843178	3.63		Putative membrane protein	TGN-10	3.67436863508	652	TAGTTTATAATCAAACTTCAAATTGGGAGAAAGAGCAAGCTTTAAAAGTAACAGAAGATTTAATTCAAAAGAAAACTGATTTTAATGTTATAATATGTCA
CD630_15900	1	1843756	4		Putative membrane protein	P-SigA	3.68957881533	74	GTATTGGAATTACTATAGTGTAGGTGTAGTATTAAAAAAACATAAAAAAACATAAAAAAATTGTTGAAAAAAATATAGAAATTTTGTATAATTAAAGATT
CD630_15900	1	1843804	9.48		Putative membrane protein	P-SigF*	3.07432607152	26	AACATAAAAAAATTGTTGAAAAAAATATAGAAATTTTGTATAATTAAAGATTTGAAAAGTGCGGTATACAAAGCCAATTCTTTTGTATATAATATATATA
CD630_15940	1	1849605	1.03	cysK	O-acetyl-serine thiol-lyase A	P-SigA	3.09799188992	47	TTTTTATTTGAATATTACTAATATTTGGAATAAAGTGATTGTAAGTATAAAATCCAAAAAAAGGTTGCATTATCAAAATGATAATACTATAATATATTTA
CD630_15951	1	1851258	3.42		Ferredoxin	P-SigF	3.51437428471	79	TAATGTATATTATATATAGGATTTATATAACTATAAAATAAACTTTATAAAAATTATTTTAAAAGGTATTTTTTTCAAATTTGAGGACATAATAAAAAAG
CD630_15960	-1	1852474	1.85	map2	Methionine aminopeptidase Map2	P-SigD*	3.85416131151	26	TTGAATAAATCACTATCTATAAAGGATTTCTTAGTATTTATGTTATAATATTTATAATGGTTATGTTTTAAAATAGTTTATGTAACCCATAATTTAAATA
CD630_15980	1	1854151	4		Putative excinuclease ABC-like	box-10	1.93519796734	29	TCATGTAGAGTATGTTTTATACATATATTATAATTAATTCTTTGAAGATTGCATATTCAAAATACACACCATTTTTTTTAATTCTATAATATAATATTTA
CD630_16050	-1	1859815	4		Putative transcriptional regulator	TGN-10	2.39146047853	104	ATTTGCTAAAAAATCTAAAGTAAAGCTTAAATAATAACTTTACAAAATGGAGCATCAAATGAGAGGATATATATTTTATGTTATGTTAGACTTGAAAACA
CD630_16060	1	1859979	1.51		Transcriptional regulator. GntR family	P-SigA	3.02899924212	88	ATTATTTAAGCTTTACTTTAGATTTTTTAGCAAATTAAAATAAAGCAATTTATAAAATAAGTATTTACAAATTAAGTGTATTAATCGTATAATACACTTA
CD630_16120	1	1865643	10.83		Putative amidohydrolase	P-SigA	2.77582233487	62	AAAAATATTTTTTAATGTTTTTGTGTATAATTATAACAATTTAATTTATATTAATGCACTTAAATTTGAAATAGAATGCTTATAGTGGTAAAATTAATTA
CD630_16130	-1	1868003	1.13	cotA	Spore outer coat layer protein CotA	P-SigK	2.81921782265	58	ATTCATAAAAATTTACAAGTTTATCTGACAAATTATTATTTTTTATTCGTTTATAATATCTTTTGTAACATTTTTTTACATTATAAATATAATATTACTA
CD630_16140	1	1868160	4		ABC-type transport system	TGN-10	2.10970107126	38	AAAATAATAATTTGTCAGATAAACTTGTAAATTTTTATGAATAATCCATTCTAAAACAAAAAACTGTGTATAAAAAAGGTTTATATGTTATATTTATATA
CD630_16170	1	1873417	2.46		Transcriptional regulator. GntR family	P-SigA	3.61385905058	38	AAATGGACTCTAATGTAGTGTTCATTTTTTTTGTAAAATTTTTTATACTTTTACTAAAAAGTAATTGACATATACTTTGTATTATTATATTATTGTATTA
CD630_16210	1	1876916	1		Putative mechanosensitive ion channel protein. MscS family	P-SigA	1.8787362051	57	CATATATATATAACAAATAGTTTGCATTTTCCTAAGATGTATAATTGGAATATAAATCTTGTTTACTATGTACAAATGGTATTGTATTATATTAAATAGA
CD630_16220	1	1878091	3.57		Conserved hypothetical protein	P-SigH	2.29267878106	128	TCATGAGGCACTCTTTTTGTACGAAATAAAATATATTTTTATTATTTCAACAATGAAAAAGAGGCTTGTTTCCATTTTGAGACAGTATAATTTTTATGTA
CD630_16220	1	1878192	13.82		Conserved hypothetical protein	box-10 ?		27	CTTTAATTTTAGTAAATATAAAGTTTTAAAATTGATAAAATAGGAGGAATTTTTAATATAAAAGGGTAAATAAAGGGTTTAGAGGGCATAATATAGAATA
CD630_16230	1	1878917	3.68		Putative oxidoreductase	P-SigB	5.74336224376	27	GGTAGAAAAAGAAGATTAGAAGATTTAAACTATCTTTAAAATAATTTCTTTTTTGAATAAATTTTGTTTAAAATATAACAAGCAGGGTATAAAGAGACTA
CD630_16240	1	1881654	2.42	vanR	two component response regulator	TGN-10		255	GAATTTTTATATAAAATAACATGGAAATTTTAGTAATGTCTGTGGTTACATACATAGGTTTAATTGTTTTTTATATGGATTGTCTCTGGTATAATAAATT	vanRS
CD630_16260	1	1883948	4	vanG	D-alanine-D-alanine ligase 2	P-SigH*	2.51499373565	55	ACAGTAATTATATCAATAGAAAAATGTGAAAATATATTATGTGGAACAGATGCAATTGTAAGTGAAGGTTGATTGGATTTGAAATAGAAAAAGTATTTTA	vanGYT
CD630_16290	1	1888330	3.13		Conserved hypothetical protein	box-10		46	AATATATAATAAAATAATTATACCTTAACTGTAAACTTATATAGATTATTTACTTTTTAATATTAGATTCATTTTTTGAGATTGGTATATAATAAACATA
CD630_16290	1	1888351	4		Conserved hypothetical protein	P-SigE	2.24457501748	25	ACCTTAACTGTAAACTTATATAGATTATTTACTTTTTAATATTAGATTCATTTTTTGAGATTGGTATATAATAAACATATAGAGTATATAATAATAGTTA
CD630_16300	-1	1889758	5.32		Putative membrane protein	P-SigA	3.2116326663	60	GGAATGGTGCTTTAGAAAATTACAAAAATTTAAAATCTCAAGATTAATTAAATATTAAAATCCTTTTGAAAAAAACTTATGTTTGCTATATAATATAATA
CD630_16320	1	1890647	4	asnB	Asparagine synthetase	P-SigF	2.7971858999	41	ATAAAAAAAATATGAAATATTAACAGATAATTTATAAGAATTTAATAGCAATTTCATTTTAAATTGAATAAGTTTTAAAGCCAAAGACAAAACTATGAAA
CD630_16340	1	1894356	13.29	terD	Tellurium resistance protein	P-SigA	3.6499808059	63	CTATGTAAAAAGTAAGAAATATAAACATTTTTTTAATTATATTTTAAAAATATCAAGCAAGTTTTCTTCACAAATGAATAAAAAATGTTATAATATGATTA
CD630_16410	1	1902795	1.72		Conserved hypothetical protein			187	ATAAGAAATAAGTATATAGAAGAAATATTATTGGATAAATATCATGGATTAATTGGAAAGACCGTAATTCATCCAATGCAAATTCAAATTGTACAAGCGC
CD630_16440	-1	1906867	4		Transcriptional regulator. RmlC-type	TGN-10	3.48238205416	8	ATCTTTTCAGAAAATTCAATATAACATAAAAAATACATGCATTATAAAACTTTTTTTTATTTTATTAATCTTTATAAATTATATGTTATAATCATGTCTG
CD630_16520	-1	1916569	4		Putative tellurium resistance protein	box-10	2.49541076467	83	TACAAGATGTTCTTACATCAGATAAAGCAAGAAGCTTAATTGAAGAAAAATACAAAGGTATTGTGATTCCTACTTTTTAGTATATTTAGTATAATTTTAA
CD630_16520	-1	1916514	2.63		Putative tellurium resistance protein	P-SigA	2.029	28	AGGTATTGTGATTCCTACTTTTTAGTATATTTAGTATAATTTTAATATTATTATTCTAATCTTGTTGAATATTGACTTATTAAGTGCTACCATTTAAATA
CD630_16530	-1	1917608	1.65	metQ2	Putative D-methionine-binding lipoprotein	box-10 ?	1.0520823032	222	GGTGTTAAATAAAATACATTAAAGATTTTAAAATATTTATAAAATTATGTTTACAGACGTAAAAAATCATGATAATATTTATAACATAATTAAAAATTGA
CD630_16540	-1	1918732	3.92	lplA	Putative lipoate-protein ligase	P-SigH	5.48752221912	50	ACATATTTTGAGTATATATTATTTATTTAAACTTTGCAAGGTAGTTTTTAAAATTTCTAATTTAAAGGAGTTTTTATATTATTGTCGAATTATAAAATTA
CD630_16550	1	1918828	4.05		Putative Na+/H+ antiporter NhaC-like	P-SigA	3.53118408877	338	AATTAATTTTATAATTCGACAATAATATAAAAACTCCTTTAAATTAGAAATTTTAAAAACTACCTTGCAAAGTTTAAATAAATAATATATACTCAAAATA
CD630_16560	1	1921376	4		Putative membrane protein			45	TGTGTTAATAAGTAGTGTTCACATTCTTGATAAAATGTGGAATAATATGTATTTTTACTAAGACGGAAATGAAATAATTAAACCATTAAATAATATTATA
CD630_16580	1	1925135	5.56	gcvPB	Glycine decarboxylase			81	TGTACAAGGAAATCTTAATATAGAAACTATAAATGATAAACTCTTAGAAGAAAATATATTAGGAGGTTATAATTTAGAATACAATTATCCAGAATTAAAA	CD1657-CD1658
CD630_16600	-1	1929884	4		Conserved hypothetical protein	P-SigA?	1.80355985309	28	AATTTCACCTCTTTTTTATTCTTATTAATTTTTTTAATAAATACTAAATTTTTTTGTAAATATATAGCATTTTTTACATTATTTTTATATAATATATATG
CD630_16601	1	1930698	3.6	tlpA	Transposase-like protein A	box-10 ?		68	AAGACTTACGGTTCTTATATATGTTATTTAAAAATAAATATAAAAAAACTTCAAAATACTTGTTTTAAGTAATTGTATATTTTAATATTATGATAGGTTA	CD1660.1-CD1661
CD630_16650	1	1938341	3.33	cysM	O-acetylserine (thiol)-lyase	P-SigA	4.33427336994	131	ATCTATTTAAATTTTTAGCAATAACAGTATTAATACTCATAGTAGCTCCTTAAAATGTAAATTATTGACAAATATAATTTACGAATGTATAATTTATTTA
CD630_16650	1	1938376	4.28		O-acetylserine (thiol)-lyase	P-SigA?	1.45952033322	96	CTCATAGTAGCTCCTTAAAATGTAAATTATTGACAAATATAATTTACGAATGTATAATTTATTTAACATTATTTATAATTTACAAATGTATAATATAATG
CD630_16670	1	1941846	3.8		Putative maltose O-acetyltransferase	TGN-10	3.10173829329	32	GTTTTAAGATGACAGAGAGATAGATTGTCAACTGTATATTTATTAAATTTTATATAAGTAAAATATATAAATTAATAAATCTTATGCTAGAATATATATG
CD630_16710	1	1947046	2.63		Two-component response regulator	box-10 ?		30	TCAAGCAAAAGGTTTTAACTAAAAATAATAGTAATTTTATTTATATTTTAGTTTAATTAAAAATAAGATAAATGAATTTTAGATAAAATATATGCTAATA	CD1671-CD1673
CD630_16750	1	1951188	1.77		Transcriptional regulator. HxlR family	P-SigA	4.10071683552	66	GTCTAATCTTAGAATCCTATTTAAAATAACTTTTTTTTTAGTAAATACACCTCCTATTATAAAATTGACTTTCAATTATTCTTACACTATAATTTTATTA
CD630_16810	-1	1956086	4		Transcriptional regulator. TetR family	P-SigA	4.76746879705	39	TACAATTAATAACATTAATTTATTATCCATAAAAATATATTAACTTATATTATTTAATAATTTATTGACAGTATTAAAATTAAATTATACAATAACAGTG
CD630_16850	1	1958888	1		Putative binding protein	TGN-10	2.59638448267	25	TTAATTTAGTTTAAATTTAAAATTGAAAAGTTTCTTATGTTTTTGAAAAAGCTTCTAATAGTTAGAAGCTTTTTTTGTAGAGTTTTATGTTACAATAAGA	CD1685-CD1686
CD630_16900	1	1963153	2.85	trxA	Thioredoxin	P-SigB	5.64766714495	97	ATATTGGAACTACATTTGAATTGTCAATACCAAAAAAGTTAAAATAATAAAAATATAAAAAATTGTTTTTAGAAATGAAGAATGGGTATACTAATTAGTA	CD1690-CD1691
CD630_16900	1	1963215	2.01	trxA	Thioredoxin	box-10 ?	1.79618318383	35	TTGTTTTTAGAAATGAAGAATGGGTATACTAATTAGTATAAAATATAAAAAGACCTTATAAAAGTAAATTTATATTTATAAATTTCATAGTATAATTATA
CD630_16920	1	1964702	9.24		Transcriptional regulator. ArsR family	P-SigA	3.22611587889	30	CTCAAAGTTATATTAGTAAAAATTGGAATTATTTATAATATACTCCAAAATTTAAAAATAATGGTTGAAAAATCTAATTAAGAGTACTATAATTTAATTA	CD1692-CD1693
CD630_16940	-1	1966090	19.35		Conserved hypothetical protein	box-10?	1.98181424559	17	GAGTATTTCAAAATAGGTTTTCCACTTATGATTATATCTATTATTATATCTACTGTTTATTTAATTATAAAATTTTAAAAAATATAGTATAATAATACTA
CD630_16950	-1	1967421	4		Putative symporter protein	P-SigA	2.69830152515	44	ATTTTCTTTAAATTCTGTCAATTTTTCAAAAACTTTGTTAAATAATATACTTTTATACATCCATTGAAAAAACAATAGAAAAGTAATACTATATATAGTA
CD630_16960	1	1967761	5.04		Sodium:alanine symporter	P-SigA	2.90003965481	86	ATAAAAAAAGCTTTGATTTGAATATAAAACTGCAATATATTAAAAAAATTATTCATTTTAAACCTTGTAATTTGATTTTATAAATATTATAATTAAATTA
CD630_17000	-1	1973366	4	ribD	Riboflavin biosynthesis	P-SigA	2.3561072161	267	CGTGGTATTTCAAAGTTTATAGACATTCTATATTATATATTAACATATATTTTTTAAAAAAATAGTTTGCAAAGTAAAATAATTTATGATACATTCTAAA	CD1700-CD1698
CD630_17010	1	1973437	4	recQ	ATP-dependent DNA helicase	box-10	1.74141814519	104	ACCCCGAAGATTAAGTATTAAATTTATATTTAGAATGTATCATAAATTATTTTACTTTGCAAACTATTTTTTTAAAAAATATATGTTAATATATAATATA
CD630_17020	1	1976109	4.64	thiC	Thiamine biosynthesis protein ThiC	P-SigA?	2.57418608491	526	TTATAGCAGAGTAATTTTTAACTTAATAAAAAATAAAATTTGTATTATTGTGTTGAACTAATAATTTTGCTGTGTTATACTGAATTTGTAAAAATAATG	CD1702-CD1706
CD630_17060	1	1980493	4	thiE2	Thiamine-phosphate pyrophosphorylase	box-10	2.57652429431	172	AGTTCAAGCTATGGTATGTATGAGATTATTTGACCCTCATGCAGCTATAAACATATCCACTAGAGAAAATTTAGAAATGAGAAGTCATATAATACCTTTA
CD630_17070	1	1981481	3.13		Putative C4-dicarboxylate anaerobic carrier. DcuC family	P-SigF	2.12147407921	61	TAAATAAAAATAAAAAAGTTATCTTTTAAATTTTAAAAGGTAGCTTTTTTATTTTATATCTTTGCTAATAAAAAATTGTAAAAAGGGAAAACTTTAGTCA
CD630_17080	1	1983391	1.9		Conserved hypothetical protein	TGN-10	2.36277206901	62	AAAAGTAAAAAACTAAATAAATTAATGTTAATTTGAAATATATATGAAGGTTTTTGGAGAATACTTACTTATGATAGGAAAAAATGTTAAAATAATAGTG	CD1708-CD1710
CD630_17110	1	1986023	9.94		Conserved hypothetical protein	TGN-10	3.10882967785	28	TTATAGTATAGATTGGTTAATAAAAGTACAGATTGGTTAATGAAACATTAAATTACAATATTTGTTAAAAAAATTGTGAGTTACATGATATAATGTATTA
CD630_17120	1	1986666	4	moaB	Molybdenum cofactor biosynthesis protein MoaB			189	GTAGAGAAAAATATGGACAATGTTATAATAATTATAGAAATTAAAAGTACTTACATTCATTATGTATGTGACATGTATAATTAGTTTTATATTTAATACA	CD1712-Cd1715
CD630_17160	1	1989712	2.9		Putative permease	P-SigA	4.00444065428	398	ATATAGTAATAGTATGAAAATTTACATATAAAACTAAAAAATGCAAGTAATTGACTTTTTAAGTTGACAAAATATTGCATATATATTATGATATAAATCA	CD1716-CD1717
CD630_17160	1	1990095	2		Putative permease	P-SigA?	2.1478954341	15	AAACTATATATTAAATGAAAATTATAAAAATATGATAGTTAATAAATTTATAAATTAGAAAATTGTAAAATATGCTAAGGTCAGTAGTTTTACGATTTAA
CD630_17220	-1	1997132	4		Putative transcriptional regulator	P-SigA	3.8411856717	14	AATACAATAGAAAATTTTAGAAAATCAAATAAAACATTTAAAGAATTTTAATATTAAAATTTATTGACTAAAAAAAATTTTAATGTTAGAATTTTTTTTA
CD630_17260	1	1999622	1.24		Conserved hypothetical protein	P-SigE?	1.5911823961	35	ATATATTAAAGAAGAAGGAATATAAAACAAGATTAGAAAATAATAGTGTTACTTTCATAATAAATACATATAAAGATATTTTTAAGAATAAAATTTATTA
CD630_17270	1	2000147	2.08		Conserved hypothetical protein	P-SigA?	2.06646034453	40	GATGTGTATTTTTTGTTTAAAAAATTTAAATATATAAAACTATAAAGGTTACAATTTTGGAAATAGATGTAAATATATGTTGTATTGTATAATAAGAGTA	CD1727-CD1728
CD630_17290	-1	2003648	4		sodium:phosphate symporter	TGN-10?	2.07391152361	78	TTTTCTAAAATTAACAACAACTTAAAAATTTAACATTCTCTTAACGTATACTTAACAAAACATTAATATTTTTATTGACAAAATTTGTTATTCTATATTA
CD630_17310	1	2005822	4		Putative acetyltransferase	box-10	2.66742460896	69	TTATTTTATAAGTTTAACTATAAATTAGGTTTATATTTTATAAAAATTTGCTAAAAAAAACAATTAAAAATTGTAAAGAAAAAAGATATAATTAGAACTG
CD630_17360	-1	2010873	4		Transcriptional regulator. HTH-type	P-SigA	3.33892525105	70	TAAGTATTCTGTATCCACTTTGTCAATTATATTTTAATTTATTTAATTATATTGAACATAGTTTTTTCAAAACCTAATTCTATATGTTATAATAATTTCA	CD1736-CD1735
CD630_17380	1	2012341	4		Two-component sensor histidine kinase	P-SigH*	3.19622131575	24	GACTATAATTTCAACATCTATTCAATTAGTTTTATAATAAATATAAATATTTAATGAAAAAAGTAGGATTTTGTTATTAAATATTGAATTTATTATAGTA	CD1738-CD1739
CD630_17400	1	2015907	2.28		Glycine/sarcosine/betaine reductase complex	P-SigL*	7.26439022532	53	TTCAATATTGGTGTAAATTAAAAATGAAAATTTCTATGACATTAATACATAGAATATATATTTTAAATAATTGGCATAGAAAATGCTTTATATATTAATA
CD630_17451	-1	2022452	1.02		Conserved hypothetical protein	P-SigA	3.54279938372	41	TTAGTATCCCATGTATACTATTTTTTATAAACATACTAACTTAGTATGTTTATTTTTTGTTATATATTGACAATTTGCTCTTTTTGTTATATATTATAAA
CD630_17460	-1	2023841	3.76	gltC	Sodium/glutamate symporter	P-SigE	1.83390121157	80	TTTTAATTCTAAAAAAGTCACATCTCATTAAAATATTTTAATTTAATTTATGATTATCTAATTATATCTACTGATTCTTTTTAATATACATTTATTAATA
CD630_17470	1	2023968	3.11	add	Adenosine deaminase	TGN-10	3.37214161846	53	AGTAGATATAATTAGATAATCATAAATTAAATTAAAATATTTTAATGAGATGTGACTTTTTTAGAATTAAAAACTGTAGTATATTGATATAATAGAAATA
CD630_17490	1	2025932	9.56		Putative 2-hydroxyacyl-CoA dehydratase	TGN-10	2.4277747405	106	AACATAAAAAATTAGTTATACAATATATCTATATGTATCTAATTTTGCATTGATAAAAACAATTATGGATAAAAGGTAAAGCATGATAGAATCTAATGTA	CD1749-CD1750
CD630_17510	1	2028073	2.08	cwp13	Cell surface protein	TGN-10	4.02530420176	88	ATATAAAAAGAAAATGAGAAGCTGAATTTATTATAAATAAATTCAGTTTTTTATTTTATTTTATTTATTTATAAAGGAAAACTTTGGTATAATTGATTTA
CD630_17520	1	2031269	1.98		Transcriptional regulator. TetR family	P-SigA	3.37494527519	32	GCTATATAAAATTCAGAATTTTCGAAAGTTTTTAAGCTTATTTTTAAATATACTAATAATACTATTGACATTAGATAGAAAAAGTATTATATTGACTATA
CD630_17570	1	2034659	4.36		Conserved hypothetical protein	box-10 ?	1.63434533712	423	GTAGGGGAGAATATTATGGCTATAAGAAAGATAAGAACATTTGATGATGAAATTTTAAGAAAAAAGAGTAAGTATGTAGAAAACGTAGATAATAAGATAA
CD630_17590	1	2036599	1.62		Putative SAM-dependent methyltransferase	P-SigA	5.38711738274	248	ATATAAAAAAATTTTTTTTACTATGATGATTAAAATTTATTAAAATTAAAATTTATTGACAAATATAAAATTTAAATATATAATTAATTCATAAAATAAA
CD630_17620	1	2040492	4.78		Conserved hypothetical protein	P-SigA	3.08152842989	110	AATAAAGTAGAGTTAAAAAACTTGATTTCACTTAAATCAATATGATAGATGTTGATACTAAGATTGACAAGCATGATTAAAAAAGATAATATTTAATCTA
CD630_17640	1	2041566	4		Putative phenylalanyl-tRNA synthetase ß chain	TGN-10	2.56740262966	36	ACATATAAAATATTTGATATTAATTGGAAAATTTAAAAAAATTAAACAATTAGCAAATAGGGGGTATATTTATAAGACACAAAGTGATAAAATCTATTTA
CD630_17670	1	2044384	5.99	gapB	Glyceraldehyde-3-phosphate dehydrogenase	P-SigA	3.26799578883	34	ATATACTAATTGTCTTTTGATAATAAAAAAACATGGAATTTGATTATTTAATCAAGAAAAAGTATTGAACAAATGATTTATTTAGTGTACAATAATCATG
CD630_17671	1	2045777	11.25		Putative membrane protein	P-SigA	3.5879981137	12	AAAAATTTTTATTATTAAAATACTGATTTCCATTTTAAAAATGATAAAAAAATGACAAATAAAGTTGCAAATAGTAATACTTATAAGTATAATTAAAAAA	CD1767.1-CD1768
CD630_17690	1	2047308	18.1		Putative CoA enzyme activase	P-SigE*?	1.364	71	CTTATTTAAAATTTAAGGTTAGAATTAGGAATTACCTAGTAGAGTAAGCTTTGATTAATAAAAGAATCATAAAATAAAAATATTAGTCATAAAGATTATA
CD630_17700	1	2051765	3.92	ogt2	Methylated-DNA-[protein]-cysteine S-methyltransferase 2	P-SigA?	1.20866701153	16	TTTAAAAATATACTCTATATTAAGTATCTATAAAAAAGAGTTATCCTATTTTTTAGGGTAACTCTTTATTAGTTAAAAAATTATATGTATACTGATATTA
CD630_17710	1	2052322	1.9		Putative monooxygenase	TGN-10	2.84356989346	69	GGAATCATTCTGATTTGAAAGAGATACTATTAAATTTAGAAAGACAGAGTTAACTTAGAAAGAAATGTTTTTATTGTTAATATTTGATATAATAATAGTA
CD630_17740	1	2055427	1.51		aminoacid ABC-type transport system	P-SigA	3.75834258922	410	TGTTATGGTGAAGTGGAAGTTGTACCTTGGAACTAGATTTTTATATTTATTTTAAAATATATATTGACATATATTGCCTTATGCTATAAAATCAATATCA	CD1774-CD1776
CD630_17850	1	2066622	11.84	argG	Argininosuccinate synthase	P-SigA	4.01395428554	485	AAGTAACATATTAATCAATTATATAAAACTCTCTTTAAAATAAAAATAAAATAAATTATATAGTTGACATAAATGGAAAAATAAACTATTATATATTTTA
CD630_17890	-1	2072033	4		Conserved hypothetical protein	P-SigF*/ P-SigG	3.058/ 2.628	32	TATTAAAATTATCAAAAAAACCTTAAATAGTTGAATCCAATTATTTAAGGTTTTTTATACTTTGAATTAAATTTTTTATATAGGATATACTAACTAAGTG	CD1789-CD1788
CD630_17910	-1	2073839	3.36		Conserved hypothetical protein	TGN-10	2.59095784992	371	TAGAAATGCTTTTAATATTACTGCTATGAGCTTTTCTCCTGAAGAAATAGCTGATTCTATAAAAAAATATATTCCTGATTTTGTGATAGAATATGATGTA	CD1791-CD1790
CD630_17920	-1	2074683	6.29		Putative L-threonine 3-dehydrogenase	TGN-10	3.08114879499	41	TTTAAATTTTTAGGCACTTACTGCACTTCATTCAATTAAGTCGTATATTATTATCTTTAATTCTTTGTATTTAAACAAAAGATTTGCTAAAATAAAAATA
CD630_17940	1	2075851	3.92		Conserved hypothetical protein	TGN-10	3.96321637293	27	TTAAAAAGTTAAAATTTATATAATTTATTTATAAAGTAAAGAAAAAATAGAAATTTGTAATAAAATAAAAAGTTTATGACATAATATGGTATAATTAGTA
CD630_17970	-1	2079377	7.62		Coenzyme A disulfide reductase-RHD	P-SigA	3.10060770754	35	GTCATATTATCACAACCTTAGCAAACATTAGTAAATGCTTATGATTTTATTAATATTTTAGTATTTTACAAATATATTGTCAAGAAGTATAATTTTATTA	CD1797-CD1796
CD630_17980	1	2079429	27.3		Transcriptional regulator. LysR family	P-SigA	3.91266409383	43	TTAATACTTTCACAATATATCACACTCCAATCTACTTTATAACTCTATAATAAAATTATACTTCTTGACAATATATTTGTAAAATACTAAAATATTAATA
CD630_18000	-1	2081694	1	terD	Tellurium resistance protein	P-SigA?	2.65158089369	61	TAATGTCAATATGTTTAAATTATAAAATATTCATGTAGTTATATAATAAATAATTTATAAATATAGCCAACTTAGCCTAAATACGTATATAATATAGCTA	CD1800-CD1799
CD630_18010	-1	2082939	1		Putative membrane protein	P-SigA	2.5786525193	10	TAATTTTCTGAAAATTCCAATCAAATTGTTTTTATAATATATTTTTATTTCTTTTATTAAAAATTGGAAAAACTATATAATATATATTATAATCTATATA
CD630_18020	1	2083056	3.26		Putative hydrolase. metallo-beta-lactamase superfamily	P-SigA	3.62904210734	22	TATTATATAGTTTTTCCAATTTTTAATAAAAGAAATAAAAATATATTATAAAAACAATTTGATTGGAATTTTCAGAAAATTAATGCTATAATTAAAAGTA
CD630_18040	1	2086293	4	scrR	regulator. LacI family	box-10?	1.30763687108	31	CAATTATTTGGATGTGGAATGGATAGTACAAGTAGTATATAAAAAGTATTGACTGGACAAATAACTATATTTTATTTTAAATATATAATATAATGTAATA
CD630_18070	-1	2091014	3.42		Putative NADPH-dependent FMN reductase	P-SigA?	1.38229080769	46	ATACATTCCAACTTTTATTGCTAAAACAATTTGTTTCAATTTTATTACAAATATACAAAGTGTATTGTTGTTAACGTATTCTCATAGTATCCTAAAACTA
CD630_18100	1	2093889	7.26		Transcriptional regulator. beta-lactams repressor	P-SigA	2.63799051782	28	CATAGAATTATATAAAAAATAACCCTATGGTAAAAATTGGAAAATATTTTTATCGACAAAATCTTTGACTTAAAAACTATATTGCGATAGTATTAATTTA
CD630_18130	1	2096203	4		Conserved hypothetical protein	P-SigA	2.45300017079	67	TGATTATGAAGATTAATATTGAGAGGCTGTATTTTATACAGCCTCTTTATTTATTGATTGTATTATTAATAAATTTTAAATTATGATAAAATATAAAACA
CD630_18220	1	2106595	1		Putative thiol peroxidase	P-SigB	4.29182978625	41	TAACATATAAATACATGAAAATTATATATTTATGAAACTTTATACATAAAAAATAAAATATTTTATTTATATATAGATTTATAGGGTAATAATATAAGCA	CD1822-CD1823
CD630_18240	1	2107949	5.24		P-type calcium transport ATPase	P-SigA	3.03247887766	32	GTAGAAGTTTTGTTAAATATTAAATGGCATTGTTAAATTTAGGTAAAATATACTTAGTGTGTATTGAATTGAACTTGATTTTAAAATATAATTATTCTTA
CD630_18250	1	2110675	1.9	metY	O-acetylhomoserine sulfhydrylase	P-SigA	4.60144507127	229	ATAATGTCTGTAATTCAAGTAGAGGTTGGGAAAATTATTAAAAGAAAAAAATTAAAAAAATAGTTGACAAAATTAGGAAAAATATATAAGATATAAAACA	CD1825-CD1824
CD630_18270	1	2113494	4.56		Transcriptional regulator. MarR family	P-SigA	3.56617749178	86	ATCCTGTATAAAATTAAATATCAATAAGATAACAAAATTTCAATTGAAGTTACAATATTGTAATTGACAATAAATACTTAATACTATAATATTTAATACA	CD1827-CD1828
CD630_18311	1	2120935	1.72		Conserved hypothetical protein	P-SigA	3.85145386675	38	AATTGAGAAGCTGATTTAAGTAAATAAAAAAATATTTTAAATTGAAAATATTTATAGAAAATATTGACAATTATATTTTCTTTGTTATAATTATTAAACA
CD630_18591	1	2153499	1.3		Transcriptional regulator. AbrB family; Tn1549-like	P-SigA	3.79923290785	29	ATTGAAAACGAGATAAAAGAATTGGTTTCAACTTATAGCAAGTAAGATAGCACTAATTTTAACATCGAAAAAATGTCCTAAAAATGCTATAATTTTTGTA	CD1859.1-CD1860
CD630_18630	1	2156572	5.26		Putative single-strand DNA-binding protein Tn1549-like	box-10	2.47532758047	8275	TATTAGCGGAACAGTTATTGATACGACTATTCAAAAAAGCAAAGAGTTAGAGCTTAAAAAAGAAGTTTTAAGAGGTAAAGAAGCAGGATATAATAAAATA
CD630_18640	1	2165617	5.97		Transcriptional regulator	TGN-10	3.38927389387	29	GTGTGGTCTTAGGACTGCACCGGCTCTTTTTTATTTATGCAAGTTCGATTAAAGAGAATATATTTATGAAAAAAGTGTATTTTGTGGTATAATATACTAG
CD630_18700	-1	2171967	3.84		Putative conjugative transposon protein	TGN-10	3.42841516912	194	AGCATTTTATAGCTACTTTCAATAACATTCTACACACCTTTTATGAAACGTTGATGAAATATAATTTTTTATTTTTCCAAACTATGGTATAATAATATAA	CD1870-CD1869
CD630_18710	1	2172047	2.29		Putative oxidoreductase Tn1549-like			50	ACAACTTTAAGCATAATACTTATATTATTATACCATAGTTTGGAAAAATAAAAAATTATATTTCATCAACGTTTCATAAAAGGTGTGTAGAATGTTATTG	CD1871-CD1875
CD630_18760	1	2177723	3.36	vncR	two component system	P-SigA	2.7614066535	24	AAGAATTATTAATTGACAATAATTAAAATTTTCGGTGCTTTTTAGCACCAAAAATTTTTTGGCTTTTAAATATCAAATAATATGCTGTATAATATAAGTG	CD1876-CD1877
CD630_18780	1	2180267	4		Putative sigma factor Tn1549-like	P-SigH	2.80619538252	-27	TATGCCAAGATGCAGAAGTCCTCCTTTTTTATCTGAAAAACAAGCAGATAAAAAAGAGATGGAGGAAACTTTATGGCAAAAGAGTATTATCTTTATATCA
CD630_18780	1	2180134	2.78		Putative sigma factor Tn1549-like			106	GTTAGAAATATTTAGAATTCAATATATTCCTCTTTTTTATAATATGTATAGTAGATGATTGTTTCAGGTGCGAATTGAAACAATCAAGTTCATATAAAGA
CD630_18800	1	2186344	1.25		Conserved hypothetical protein	P-SigG	1.85732563801	43	ATTTTTCTAACTATAAAAATAGTATTATACTTATATTTAAAAATAAAAGAATTTTATTCCTATTGTGTAAAGTGAGAATACTATTTTCTTATATTGGTAT
CD630_18820	-1	2188931	13.59		Site-specific recombinase	box-10		15	TTACTGTATTAAAATAAACCTAAAAAATATATATTGTATTTTGAAGGTTTATTTTTGTGTTTTAAATATAATCAATCTGTTACTGAATATAATATATTCA
CD630_18830	-1	2190115	1.56		Transcriptional regulator. AraC family	TGN-10	2.77661908081	145	ATTAAATGTCTAACCTAAAATATTATAAAAATTTCATAATAAATTAAAACTGTTATCTTATATAAAAATTAGATACTAATTTGTGATATACTTTAATGTG
CD630_18840	1	2190340	6.95		Conserved hypothetical protein	P-SigE	2.16115024795	15	ACTATTTTTGAAGTTTACCCTTAATCAAGCAACACTTAGTTATTCAATTATAAATAATGATTGAGAATAGGACAATTTTTAAGATACATAAAATATAAAG
CD630_18910	-1	2196837	3.73		pseudogene. putative ABC type transport system	P-SigK		29	AAACATAAAGCTGAAAATTATTATTAAGTTTTTGTAGAAATATTATAAGCATAGATACATTTTTGTAACAACTACAATAAATTTTTAATACTATATACTA
CD630_18930	-1	2198595	2.58		Putative oligonucleotide binding regulator	TGN-10?	1.40253164145	33	AAGTTTTATTGAGTATTCTTGCTTCTTTATAAAAATATAATCTATTGTCTATATTATATAAAACGTTTTCTTTTAAAGTTTTCTGTGATAATATTATTTA
CD630_18950	1	2199775	2.51		Conserved hypothetical protein	box-10?	1.37497583446	27	TGTAATGAATAGGAAGTAATTAAAAAGAATTTTTATTGATTTTTAAAAATTTAGTTAGAAACTATATCATTATGGTAAAAAATGTATTATAATGTTTAGA	CD1895-CD1896
CD630_18980	-1	2201962	4.94		Putative phage-related cell wall hydrolase (endolysin)	P-SigK	2.90878223156	33	CATTATTTACTTAATATTCTATATTTTTACAAAATGGGTTATAATAAAAGTATAAGATATAAAAAGAAACAAAATTCTAGGTTATGCATATATTAAATAG	CD1898-CD1897
CD630_19000	-1	2202944	7.92		Conserved hypothetical protein	P-SigH	2.64303396044	71	GAGTTCATAATTTTAAAACTTATTGAATATAATTATATGTCGGTTAAAGACGTATGAAAATAAAAGGAATTTACAAGTTATGTGTTGTATAGATATTGTA
CD630_19030	1	2204172	4		Putative lipoprotein signal peptidase	TGN-10	3.1825544771	69	TTGTACAACGACTACGAGTAGAAATATATGGAGATAAGTATTATCTACGAAATCAGAAAAGAAATGACTTGATAATTTACCCATGTTATAATTATTGATG
CD630_19050	-1	2207919	4		Site-specific recombinase. resolvase family			115	TGAAATTAGAGATTTGTCCTGATACAATTAAATATCAAAATTTATTATTGATTTAGAACTTGAATAGTAAAGAAATAAAATAAATAGTCATATATTATAA
CD630_19070	1	2208391	4	eutG	Ethanolamine iron-dependent Alcohol dehydrogenase	P-SigA	3.23535402137	91	GTAAAGCTAATACATAAGCTTTGATTATTGATTTTGTATACTATTGGTTTTATACACTATGACTTGACATTATATTAATCAAATAGTATATTTTTAAATA
CD630_19100	1	2210723	2.35	eutV	Two-component response regulator	P-SigF*	2.78927484192	31	ATATCTAGAAAAATATAGATGAAGTTTAAGGGGAAATATTTTTTTATTCAAAAATATTATTAAAGTATGATAAAATAAAAAAATGTATAAACTATTTTAA
CD630_19270	-1	2225857	5.12		pseudogene	P-SigK		31	TACGTACAAGTTACTAAGAAAATACGTAAATAAACAAAATATTTATATTATATTTATGAAAAATGGTACAAATAGGTCATATTGTTAATAACATAATATA	CD1927-CD1926
CD630_19300	1	2228238	4		Conserved hypothetical protein	P-SigK*/ P-SigE?	3.115/ 1.16	70	TACTACTGATGTAAAATATTTCATTTTATATAATATAAAAATTATACAGTGTCAATTTTCTATATTATTGTACTATAATCTATTATTTAAAATATTATGT
CD630_19310	-1	2230299	4.63	lexA	LexA repressor	P-SigA	3.06514982464	52	GTAAAACGTGATATAGTCAAGAATTTTGAATGGATTGAGGACGATTAAAAATCAGGAACAAATGTTTGCAGATATAAATGGATTATGTTATAATTAAAAA
CD630_19340	-1	2233076	5.81		Conserved hypothetical protein	box-10	1.18968006782	30	TTAAGTTTTAAAGGTTGGCTATAGAAATAGGACACTATAGTGAACCTTTTTTACTTTATATGTTTTATTTTATGTAACTTTTAATGTATAATCTTAAGTA
CD630_19350	-1	2233561	4.07	spoVS	Stage V sporulation protein S	P-SigH	4.18993537636	102	AAAATGCTTATAGAATATAAAGAAATTTGTAGTTTTTTCATAATAAAATGGTTAAAAAAAATAAAGGTTTTCTTAAAACGATTATAGAAGTATATTTTTA
CD630_19390	-1	2237340	3.56	accB	Acetyl-CoA carboxylase subunit	TGN-10	3.09376659922	29	ACTGGTTGTTAATTTAAAATTAAAAGATATATTGATGTGTTGATTCTCTAGTCAGCACTTTTTCTTTTATAAATTTGTTTTTTGTGATATAATATTAGCA
CD630_19400	-1	2238053	14.36		Putative membrane protein	P-SigE	2.40879122676	17	CTATACTTCAAATTTCTTAAACATAAATTAATGAAATTAACAAAATTTTATTCAGAAACATATAAAGATATATTTTACTATTTAAATGCATATCATTATA
CD630_19401	1	2238169	4.79		Putative membrane protein			133	AAATAGTAAAATATATCTTTATATGTTTCTGAATAAAATTTTGTTAATTTCATTAATTTATGTTTAAGAAATTTGAAGTATAGTGTAGTATATATTAATG
CD630_19410	-1	2239469	4.21		Conserved hypothetical protein	P-SigH	3.84181782722	29	TTTAATAGTAGAAATTTATTTTAATTTATATTAATAAAGTGTACGAAAGTAGGTATATATAACAAGGAAACAGAACCCTCTCATAGAAATTAAATTATTA
CD630_19420	-1	2240265	4	trmB	tRNA (guanine-N(7)-)-methyl-transferase	box-10?	1.07564539747	37	ATTAAGTTTTTAGTAAGTTTAGAACTCTCTTTATAGAAATAAATTTCTATTTTAAGAGAGTTCTTTTTATTTTTTGGTGAGATAATGTATAATAAAAATG
CD630_19450	-1	2241902	1.19		Putative enzyme	P-SigA	2.34823014577	23	AGATTTTAAAATTGTCTGTGGAATAACTCCTCAAAAATACCGAGCTAATATGTCTGATTTTTACAGTGAAATTGCAAAATTTTAAGTTATAATACTTATA
CD630_19530	1	2251126	2.49		Conserved hypothetical protein	P-SigA	2.82971560713	44	TATAAAGTTCAAGTTTTATATTCATATATAATTACTCCTTATGTCAAATATTAGTATTATTTATTTTACTTATAATTATATTTGAATTATAATATACATG
CD630_19580	1	2257668	4.8		Putative 4Fe-4S binding protein	P-SigA	3.08851024606	80	TTCAAAATAAAAACATCATAATCAAGCATATAGTTATATATTTCCCAATTTAATTACGCTTAAATTGAAAATATAACTTTATTCTTATATAATTAAATTA
CD630_19660	-1	2268606	3.76		Putative acyl-CoA thioesterase			131	TATTTTAAACCTAATAGCATTCCTATCTTTAATTAGCCAAAAATCAACTGGATTTCATATAGACTACATAATTTTAAATTACTAAAAAAGACAATATGTT
CD630_19670	-1	2269795	2.06		Conserved hypothetical protein	P-SigH	4.76380331654	86	TTAAAGAGTAATAACATAAGATTTGTCTAAATTTTTTAGAAACTTTAGACAAATTTTTTATTTAGAAGGAAAATAGCTTTTATCATCAAATTAATAATTA
CD630_19700	-1	2271914	1.46		Putative enzyme. cyclase family	TGN-10 ?		68	GGTGAAGATGTTATATTTACTGATAATTCTTTCCAAGATTTTTCGGTAAATCCCTTGAGGTTTATAAAAAATATATAGTAGTATGGTATATAATGGAATA
CD630_19740	-1	2276277	2.03	hfq	Hfq-like RNA chaperone	P-SigA	2.5047398846	47	ATAATCTTATATATTAAAGATTCTATAAAATAATATATAAATTTTTAAGTATACAACTTAATATTGAAAATTTGTCATAACTTATATAGAATATAAGGTA	CD1970-CD1968
CD630_19801	-1	2285310	6.26		CHP and ABC-type transport system	P-SigA	2.82559993521	239	AATAATGTACAATTTATATTAGATATTTTTGAACGGATAAAATATCTAATATAAATAAAAAATTTGTTAAAATATGATAAGTGTAGTATAATCAAGTAGA	CD1980.1-CD1978
CD630_19860	-1	2291236	1.48	miaB	Dimethylallyl-adenosine tRNA methylthiotransferase	TGN-10	3.03014701039	36	AAATATAGTATATATAAATCATTAGATTTACTATTAAAACACAACTAGAAAAATAATAATATCTTTAAAAGATTTTTCTTATTTGATATAATTAAGGTTA
CD630_19870	-1	2292983	1.25	cwp28	Putative cell wall binding protein	P-SigA	1.94390647439	99	TATAAGTATTTATACAAATCTAGTTGATTTTTAATATAAATGTAAATACAATTATAGCTAAATGAATAATTGTATTAATATTTATTTGTAATATACTTAA
CD630_19880	-1	2294701	39.94	trpP	Putative tryptophan transport protein	P-SigA	3.85769264235	438	GTATAGTATAATTTACTTTTTTTATAAAAAATAGATTACAAAATATATTTTTTATAAAAAGGTATTGACATTTTTTAGAAAAAAGAATATTATTATTTTA
CD630_19900	-1	2296523	4		Putative protein with SH3 domain	TGN-10	2.6694271143	171	TTTTTGATTATTATTAATTAAAAATTTAATTTATATTTAAATAATATAAAATTTGAGGTAATATTATTTTTTAATTGTTCAAATTATGTTATTATTCAGA
CD630_19902	1	2297986	1.34	cspC	Major cold shock protein CspC	P-SigA	3.169	59	AAACGTTTAAATATATTTTTAATATTAAGAATAATTAAAATGTTAACTAAAAAATATAATTAAGTAGACATTTCTATTAATCTATGATACAATAGTATTT
CD630_19903	1	2297483	6		Conserved hypothetical protein	P-SigA	1.82105663393	160	TCTGTTTTTAAGTGTAAAATAATGTTCATATCTATAAATTTATTTAACTTTCAAACAATCCTGTTGAATAATAACTAATTCTATTGTATTATTTTAGTTG
CD630_19921	-1	2300506	2.13		Conserved hypothetical protein	P-SigA	1.8246957096	24	TAAGAATTTTGAAGGTAAAGCTAGTTTAAAAAAATAAAGGGACTAATTTGTCTAACGTTTATTGGTGAAAAATAAGTCTATAGAAGTTATAATAAATATA
CD630_19930	-1	2301375	7.64		Putative decarboxylase	P-SigA	2.45381895954	20	TTGAGATTTCAAAAAATAATATAAATTAGGCTAATGAACATAAAATGAAAATTTGTATTTAATGTTGAAAATATAAGTACGGTGTGATATTCTTATAAGA
CD630_19970	-1	2308315	2.46		Putative proline imino-peptidase (PIP). S33 family	P-SigH*	2.54903895652	72	TGAAAGGAAACCAATGGGACAGGTAGAGTAACAAAACTAAAATAGCAACATATTTTTTTTAATGTTAGAGGAGATATCTATGGCTAAAAAAATTCATGAA
CD630_19980	-1	2309073	19.99		Transcriptional regulator. TetR family	P-SigA	4.25288015138	33	TTAGTCTAATTAATACCTGTCTAACCACCAAACCTTATTGTTTTGCCATAAACACAATGTTACTTGACAGAAGCAGGAATAGCTTATATAATAAAAACCA
CD630_19990	-1	2310251	4	fldX	Flavodoxin	P-SigA	2.129526568	102	GATACAGTGTTTTGATATTATAAAATGAATATAAAGTATAAATGATAAATGTTATCAATAAGTATTGAATTTCAAAATCAATTGTGATATTCTATATTTA
CD630_20000	-1	2311655	7.84	isp	Intracellular serine protease	P-SigA/ P-SigE?	2.389/ 1.697	89	ATAAGCAAACATGTATTTTTTAATATAGTTATCTAAATATTATTTTATATACAATAAAATATGACTCCTAAAAATAAAAAATATATCATAAATATAAATA
CD630_20040	-1	2315314	5.4	effR	Transcriptional regulator. MarR family	P-SigA	2.96856892383	30	AGCAGACCAGCTATGGCAATTTCAAATACATATACTAAGTTTTAAAAATATACATGTACCCTATTGACTTTTTGGGAAGGTACCTGTATATTATTTGTTA
CD630_20051	-1	2316439	6.2		pseudogene	TGN-10	2.79430190539	22	AAACATAAAAGCCCTTTAAAGAGGGCTTTTATATATTAATCACAAATCACTTATCACAAATCACAAGTGATTTGTGATTGTTGATGATAAAATAAGAATA
CD630_20131	-1	2323593	1.76		Conserved hypothetical protein	P-SigA	2.27168766096	214	CTAGTTGAAGAAGGAGATATAATTTCTATAAACATACCAGACAAAAAATTAGAGTTAAAAGTAGATGAAGTTGAAATAGAAAATAGAAAATTAAAATTTA
CD630_20141	-1	2325808	6.37		Conserved hypothetical protein	P-SigF*	2.72613699938	26	AAAATATATATAATCAAAGTTTCTACAATTATATAGTTAGGGATATAAAAATTTTATCGTATGCATAAATATTATAAATATATGGAAATAATAATAGTAT
CD630_20170	1	2327622	3.57		Transcriptional regulator	box-10	2.04717559851	16	AAATGGTAATTTTCAATATATTTTATTATTTTAACCCTTTTTTTTTATATTTTTGGTAATTTTATTTTACTTTTTATCAAAATAACTTATAATTTCGGTA
CD630_20171	-1	2328207	1.9		Conserved hypothetical protein	P-SigE*	1.92162833742	61	TAAAAGTATTATTATATAATTAAGATAATTATCTAGGGAAATTTTGGATAATCAAAATATATTTTATAAAATCAAAATACAATTACATAAACTTTATTAA
CD630_20180	-1	2329770	2.15		Transcriptional regulator. AraC family	P-SigA	2.83953485523	64	CTTTTTTAAAAGAGTTTGTCATTTTTATTACCTCCTTATTATAATGACTGGCATTATGTTAATGTTTACAATGATAGTTACATTTTATATAATAGCGATA
CD630_20200	-1	2334014	2.17	clpB	Chaperone protein	P-SigA	2.3163393522	14	ATATACAAAAAAACGAGAATTTACTTGATAGTCTTTTAGAGCTTAGAAAATCAATAATTATAAATGAGAGAATTTAATTTATTTGGATATAATATTAAAA
CD630_20220	-1	2335093	4		Conserved hypothetical protein	P-SigA	3.3366674357	39	ATAAAGTTTAGCTTATAGCTAAATAAAAGTTTACTTATAAGGTGAACTTTTTGCATTTTCAGTTTTGACATACATATTTTTTTGTAATATATTTATATTA	CD2022-CD2020
CD630_20340	-1	2347427	5.02	argC	N-acetyl-gamma-glutamyl-phosphate reductase	P-SigA	4.00637422393	482	TTTAGATACAAAATGCTGGAAATTAACCATATAGAAAATATTTCCAAAAATTTAAAAATTATATTGACAAAGTTAAAAAAATAAACTATCATATAAAACA	CD2034-CD2030
CD630_20400	1	2352793	4		Transcriptional regulator. MerR family	P-SigA	2.021	35	GTCCACCACTTCCAAACTCTCGGCTAATTGTAATAATTTTCATAATATCTTTTCCTCACATTTCATTGAATATAAAAGCTTTCTATGTTATCCTAAAGTA
CD630_20460	-1	2359093	3.92		Conserved hypothetical protein	P-SigB	4.31262001081	17	AGCATTAAAAAATAAATTTGTATTTTGTTTTATATAAAGTAATTTGAAAAATATGGAAAAATTGATTAGTACATTATTAATTAGGGTATAAAATGGTGTA
CD630_20470	-1	2360261	4		Two-component response regulator	P-SigB	3.41121692534	67	AATTTTGAAGTGTGCAGTTTAGATAATAAATATATATAAATAATAAAGAAAATGGATTTATAGTATTTAAAATTTCTTATAAGGGTAAAAAATGCTATTA
CD630_20480	-1	2362503	1.48		Transcriptional regulator. RpiR family	TGN-10	3.63085058317	166	AATAAGATAGATAACTTTTAAATGAGTAAAAATTGAAAAATTTAAAAGAAATATTGGATAAATATTAAAAAATGCAAGGAAAGATGGTATAATAAATTTA
CD630_20520	-1	2366194	4		Putative lipoprotein	TGN-10	2.13298989736	21	CGTTCGTAGCATATCTGCTTATTTTTTGTTTTACTAACAAATTTCTTGTAATAAATATAAAATATTTTAAAAACTTTATAATTATGATAAAATTTAAAGT
CD630_20520	-1	2366432	1.85		Putative lipoprotein	TGN-10	2.68082092554	259	ATCAACTGGTGCATATGGATATTCAATGTCTTCAAATTATAATAAAATACCAAGAGCAGCAGTAGTATCAGTATTTGATGGAAATGATAAGATAATTTGT
CD630_20540	-1	2369166	5.09	lysC	Aspartokinase	P-SigA?	1.605	86	AATTGTATATAAGCTAACTTTAGAAAAGAAAACTATCGATTTGCCACATTTTGTAAAATAATTGTTGCAATATTATATAGAATATGATAAAACTATATTA	CD2054-CD2053
CD630_20550	-1	2369907	6.45		Conserved hypothetical protein	P-SigA	1.72656702279	36	AGTGATAGCTAATTTTTATAGAATTTAATTCTATAAAAATTAGCTATTTTATTTTAATTCTTTGTAAATTTAATGTCATAAAATTAATATAATATTAGTA
CD630_20570	-1	2372757	2.88		Conserved hypothetical protein	P-SigA	2.96020044731	53	TATAGAAAACTTATATTTATATTTTTATTATATTATATAATATTAAAGTACCTTAAAATCAAAATTTGTAAAACCACATTTATTATGTTAGAATATCTTA
CD630_20580	-1	2373652	1.7		Conserved hypothetical protein	P-SigA	1.92852855335	79	CAAAATATTAACTTTTATACTAAAAACATGTTTTTACAGTTTATTTACAAAACATTAGATTGGTTGAATTAATTTTTAAAAGACTGTATTATAGTATGTA
CD630_20590	1	2373768	3.87	glnS	Glutaminyl-tRNA synthetase	P-SigG?	1.86411079398	97	TCTTTTAAAAATTAATTCAACCAATCTAATGTTTTGTAAATAAACTGTAAAAACATGTTTTTAGTATAAAAGTTAATATTTTGCATAATACTCTTAATTA
CD630_20610	-1	2377260	2.95		Conserved hypothetical protein	P-SigA?	1.18692267653	60	ACTTTCCTTTTTTGATTGAGTAAGTTATTTTGGAAAAAATTATGTAAAACTATTTAAGTTTTATATTGTATTTTTTTTTAGATGTACTAAAATAAACTTA	CD2061-CD2060
CD630_20630	-1	2379306	4.29		Conserved hypothetical protein	P-SigH	3.39820799533	98	GATTTTAAAAGATTAATAAAAAATATTTAAAGATAAAAGCTTTATTCTATATGATTCTAAGATAGAGGATTTATAAGTGTTTAAGGTGAATTAAATATAA	CD2063-CD2062?
CD630_20640	1	2379510	4		Conserved hypothetical protein	P-SigA	3.14486700426	14	CTACTTTATCTAATTTTCTCTTTTTTAGAATTTAAGAATTAAAATTCTATAATTTTAAAACATATTGAATTTATTTTTTTGAGATGATATAATTTTCTTA
CD630_20650	-1	2380632	9.88		Transcriptional regulator. beta-lactams repressor	P-SigA	2.88439560713	31	TTTTGAATAAAAATATAAATTTTTTGTATTAATAAATTTGGATGAGATATTTTAAATAAAACCTTTGACTCGAAAAGTCTATTAATATAGTATTTAATTA
CD630_20660	1	2380916	4		Putative integrase	TGN-10	2.90944473641	26	TAATATATACATTTTTTAAATAAATATATACAATGTATTAAAATGTATGCAACTCTATTTCAAAATTATTTTGTGATATATATATGTTATAATAAATGTA
CD630_20670	-1	2382766	7.02		Conserved hypothetical protein	TGN-10	2.99999596946	28	GGAGGTTTTTTATGTTGTTTAAACATGTTTATTAGCAGAATAGAGTAATATTTTGTATATTAAGAATTTAAATATAATATAGTAGATGATATAATAAAAA
CD630_20730	-1	2391282	2.58	xdhA	Xanthine dehydrogenase. molybdenum binding subunit			63	GTAATATATTAAATAAAGAAAAAGATATAGATAAGGCATCTATTGTTGCTAGTAAGGAACTTACTTATGGAAGTAATATGAGAGCTAGTAAAGAGTACAG	CD2075-CD2073
CD630_20760	-1	2395914	9.4		Conserved hypothetical protein	P-SigA	2.90936071082	6	AAGTAATAAAGTGAATCAATTTTGTTTAATTAAAATTTTAATAATTCTGATATATATGTTAACATTGTATAGCATTTGTGTAAAATGTTATAATAATTAA
CD630_20910	-1	2416082	4		Putative xanthine/uracil permease	P-SigL*	6.42640273559	80	GCTTTAATAAATTATCAAATACTAACAAATATAATAAAAATTATATATGTAAAACAATTATGTTAAAAAATTGGCATTATAATTGCTTCATATTAAGTTG	CD2091-CD2089
CD630_20920	-1	2417421	2.22		Transcriptional regulator. sigma-54-dependent	TGN-10	3.17704510346	50	TCAAATTAAAACTAAGTAGATATACTTTTTATTAAGTTTTGTTTTAAAATAATATTATTAAATTATAACTAAGCTTTTCTGTTATGATATAATTAAATAG
CD630_20980	-1	2423880	1.99		Conserved hypothetical protein	P-SigA	2.13931042794	46	AAATAATTATTTATGAAAATTTAGACTAGTTTTACATGTTAAACAACCAGTTATGTCATACCTGTTGAAAGATATTTAATAAGTAGTTATTATAATATTA
CD630_21020	-1	2428995	6.9		Putative Na(+)/H(+) antiporter	P-SigA	3.50900957401	53	AAATTATATAAGCGTTATTTAATTGTCAAAAATGAAAGCTAAATTGCATGTCCTAAAAAAAATGATTGATAACATTTATTTGTGTGCTATAATTATATAG
CD630_21070	-1	2436221	2.83		Xanthine/uracil/thiamine/ascorbate permease family protein	P-SigA	3.92501974291	206	AATAAATCAATATTTAATATAATCGAATATTAATACAAAATCAATACAATATATACGTATATATTGACAAAATTAATTATATAAATTAAAATAATATTCG
CD630_21100	-1	2440102	6.41		Putative transaldolaseC-like	P-SigA	3.84631025536	27	AAATTATAAAACTAAGAAGGAAAAGTAAAACAATAATAAAAAATAAAAAACAATAAGCAAAATGTTGAAAATAATACCAAATCAATATATAATAAGAATA
CD630_21110	1	2440319	3.92		Transcriptional regulator. DeoR family	P-SigA	2.04440861382	30	AAATATATAGTTAGAAAAAACATACTTTTTATATTAAATTAATTTTGTATTTCATGTTAAAATAGTTGATATATTGTATTTTATCTTATAATATTTACTA
CD630_21120	-1	2441657	11.16		Conserved hypothetical protein	P-SigG	1.73540000564	34	TGAAATGTATAGATTTAGATAGTTTAAACTATATTTAAGACTTAAAAATTATAATTGATATTACAAATAAATATATGTACTTTGGGAAAAATAAATATAGA
CD630_21140	-1	2443993	2.61		two component system	P-SigA	1.56228472235	40	GTATCCAAAAGAGCTATCTTTAAATTAAAAGGATTAATTTACAAATTAAGATAGCTCTTTTTTCATGTAAAATTCACAACAATAAGATAAAATATAAGTA	CD2114-CD2113
CD630_21151	-1	2447122	9.4		Conserved hypothetical protein	P-SigB	4.04837818703	33	AAATTAATATGTAATACTCGCAATAGGATATAAATGGTATATATGGTAATAATTTATATTAAAAAAACTTTTATAAAGTTTATATTTGGGTATAAAAGTA
CD630_21160	1	2447663	4		GTP-binding protein BipA	TGN-10	3.67720244305	28	CAGATGCAAAACTAACAGTTTTATCCAATTTAAACTATATTAATACAATTTAATATATTCCTCCTTGTACCTAATAATATATTGTGCTATAATTAATAAG
CD630_21180	1	2451297	21.22	thrC	Threonine synthase	P-SigA	3.61868968715	356	TACTCAATTTGATTACAATTTTTTTACAATTTAAAAAATATTTTTTCCAAATTTTTATATTAATACTTGACTTTGTCTGTTTTATAAACTAGAATAATTA	CD2118-CD2119
CD630_21200	1	2453984	1.98		Putative 2-nitropropane dioxygenase	P-SigG*	2.33398379193	180	AGTGGAGCTGGACCTACTATAATGTCTTTAATAAAAGAAAATGATGATAGTTTTGTGGATAATATGAAAAATTACCTACAAAAACTAAAATCTGATTGGG
CD630_21240	1	2459481	1		Putative malate transporter	P-SigB	3.49832589116	16	ATAATATTGAATTTTTACCTTTTGTCACTATATTGTAACATTAAATTTTAAATTTTATAATCATTAGATTTTATTATGTAATTGGTATATAATGTATATA
CD630_21270	-1	2464324	1.9		Putative exported protein	P-SigA	2.21210601392	91	ATCATATTGTAAATTTATAAAATTAAAAAAAGATTTAATATAGTGAAAATTTCCATCAATAGTATTGAAACTTGATAGTAACTATGATAGGATATAGTTA
CD630_21290	-1	2466946	5.19		membrane-associated peptidase. M50 family	P-SigE* /PSigH *	2.816/ 2.656	123	ATGGGAGGAACTTATTCTTCTGTTTTAAATTCAGCAAATGAAGTTTTAGTAAGTGAATTTTTAGAGGATAAAATTGGTTTCTATGACATACCATATTACA	CD2130-CD2129
CD630_21370	-1	2474380	2.78	frr	Ribosome-recycling factor	P-SigH	3.58179726564	65	GAAAGAATTAAAAGTAATGGATTCTACAGCTACATCTTTATGTATGGATAATAAAATTCCAATAAAGGTATTTGAGCTTACAACAGAGAATATAATAAGA	CD2137-CD2134.1
CD630_21400	-1	2476993	3.01	rpsB	30S ribosomal protein S2			160	GTATAGATAACGTATCATTAAAAACAAAATTAAAAATGAAATTTGCAAATTAAATTCAAAAAATGGTATAAAATACACAAAAAAATATAAAAATAGAAAA
CD630_21430	-1	2480280	4		Transcriptional regulator			36	TGTAAAAATGGATAAATTGTTACAGATAATCCAATAAATTGTTGATAAAATTCCAACATCATACAACACCTAAATAACAAAAGAATCATATCATATAATA
CD630_21440	1	2480394	3.26		Putative membrane protein	P-SigK	2.48223841224	38	TTCTTTTGTTATTTAGGTGTTGTATGATGTTGGAATTTTATCAACAATTTATTGGATTATCTGTAACAATTTATCCATTTTTACAATACTATAACTAATA
CD630_21450	-1	2483259	4		DNA mismatch repair protein	P-SigA	1.69869730002	231	AATATAAATGAAAGTATAAGCTTATTTTCACTATAAAAATTTTCACTGTACAAAAACATTAATGACATTATTTTTATTGACATAAATATATAATTTATGG
CD630_21480	-1	2485887	10.66		Putative serine/threonine protein kinase	P-SigA	4.04848023075	38	ACAGCCTTTTTTGTAAAAATTAACACTATTAGTTCTTGTTTTAATATTACAATCATTAATATATAGAAAATATTCCTATATATTGGTATAATTGTAAATA
CD630_21490	-1	2487449	6.74		Putative vancomycin resistance protein. vanW family	P-SigA	2.30379032711	62	AATATCAAAAATAAAACTAATTATAAGACATAAATTTACAATAAAGTTACATTTGATTAAATTCCTTGTTTAACAAAAGCTATTCAAATATAATCTAAGG
CD630_21501	-1	2488648	7.29		Conserved hypothetical protein	P-SigE*	2.42060882061	39	ATAATAAATATACAGAACGAATGTTTGCAGAACGGGTGTTTTTTGAATTTATTTTAATAATTTATGAATATATATCAGAATGCATAAATATATTTAAATA
CD630_21510	-1	2490290	4		Putative membrane protein. DUF819 family	P-SigA	2.60524614348	178	ATAATTAATAAAAATAAATACAAAACAAAATAAATAAATAATAAAATATTTAGTTTAATTATCTTTACAAATAAAAATTTTAGTAATAAAATAATTGTTG
CD630_21580	-1	2497945	1.51	gabT	4-aminobutyrate aminotransferase	P-SigA	3.16585304721	79	ATTTGATAAAAATAAAATATATTGTTTCTGAATAACAAATATTTTGAAAATTATAAAAACATATATTGACAATTTGTGTCAAAAATACTAACATTAAGTA
CD630_21630	-1	2502486	4		Putative alanyl-tRNA synthetase	P-SigF/ P-SigG?	2.957/ 1.55	139	TGTTTTAATATACATTTTATTATATAAGAAAATAAGTAAACATACATGTTATAAAATATTGGAATAATATACAATTATAAATTTGTTAACACTAATATCT
CD630_21640	1	2503027	2.97	ldh	L-lactate dehydrogenase	P-SigA	2.25205263607	103	TATTTTAATAATTATTAATATACATATAATACTTTAATATTCACTAATAGAGAGTATATTAACATTGCTTTTTTAAAAATTTTAGTATAAAATCATATTA
CD630_21660	-1	2506476	2.03	msrAB	Peptide methionine sulfoxide reductase MsrA/MsrB	P-SigB	3.46215332714	25	GATTCAATTTGCAATTGTATTTTTACACATGATTTCATTGAGTAGGTAAAAATAATAAAATGCAGATTATTAAGTTACTTCTTAGGGAATAAATAAAGTA
CD630_21670	-1	2507545	2.02		Acyl transferase/acyl hydrolase/lysophospholipase	P-SigK	2.28098072001	47	TAATATCTTATATATTTTATTTTAAGTATTAAAGGTTTGAATGTAACTTAAATATTAAAAGAGGAACATTGTAATATGTAACTTGCATAAAATATATATA
CD630_21680	-1	2509460	1.83	hcp	Hydroxylamine reductase	P-SigA ?	1.03843785236	17	CCATGGCAAATAGTTACTATATCTGTAGATGGAAAAATTGTAGATGGAGAAATTTAATTAAGTGAATTATAGAAAAATATAATAAATTTTAATAAATAAA
CD630_21700	1	2510377	4		Putative cNMP-binding regulatory protein	P-SigA	2.88286530642	37	TATTTATTTTTAATACCTATATTTCTTTATTTCAAATTTCTTGTAGTAGGATTTTTATATCCCCTTGCTTTTATAAACTTAGTATAGTACAATGAAAACA
CD630_21810	-1	2526064	1.21		Putative alpha/beta hydrolase			26	ATTAGCAAGGAATGTTGATTTTATCTACATTCTAAGTTATACTATTTTTAAGTGGCTAAGGGAATAGTCATTTTAAATATAAGTAATAAATATATACCTA
CD630_21810	-1	2526130	4		Putative alpha/beta hydrolase	P-SigA?	1.063	92	TATTTTCGTACAAAAAAGAAATTTTACAGAAGTTAAATTATAATAAATTAGACAAACAATAGATAAATTAGCAAGGAATGTTGATTTTATCTACATTCTA
CD630_21840	-1	2528930	5.16		Putative N-acetylmuramoyl-L-alanine amidase	P-SigK	2.389	66	TATTTAAAAAATATAGATTTATGATAAAATAAGACAAATATGTTAAAAAAATGATAATCACGGAGAACTTTTACCTTCTTCAATTAATATATTATTATTA
CD630_21900	-1	2537305	4		Cyclomaltodextrinase (maltogenic alpha-amylase)	TGN-10	3.502	54	TAGAATTAAATTTAAATAGTATAGTTTATTTTAAATTGAATAGTTTATTGTTGATATATTTTACTATTATATATTTTTATTGTGATATAATAGTAAAATA
CD630_21910	-1	2538354	4		Putative phosphoesterase	P-SigA?	1.68139432366	24	CTTCTCTTTTTTGTAAAAATAAAAGTATGTAAATAAAATTTAACCATTATAATTTTCTTTTAACAAATGTATACAATAAACTTGTTGTATAATTAAGATA
CD630_21930	-1	2540455	2.58	cwp24	Putative cell wall-binding protein	TGN-10	3.82261268755	97	AGAACAAAAATCTAGTAAATTGTAACTAAAATGTAAATTTTTCCTTTAATCTATACAATATTATGGAAACTTTTTGTAATTTATGATATAATAACAAATA
CD630_21950	1	2542308	14.46	ftnA	Ferritin	P-SigA	2.11829784952	29	TTATAATTTTTTTAATGGTAGTATAAATTTTTATTAAATATGTAAAATATTTAAACACTTTTATTGAATATTTTTCCATTTAATATTATTATATTTTATA
CD630_22080	-1	2558484	3.84		Transcriptional regulator. MarR family			136	TAAATTTTGAAAAACTTATTATAGCCTAAAATATATTTAATTTATAATTTATTATAAATTGATTGTAAATATGATTTTATGAAACGGTATAGCCATAATG	CD2208-CD2207
CD630_22120	-1	2565214	2.27		Transcriptional regulator. MarR family	P-SigA	2.65916580983	37	TTATAACTATATGATATAAAAATATTTAATACATGAAATTTATATGAATTTTTTATAAATATATTGAAAAAATGCATGCAGTATAGTAAAATAATACTTA
CD630_22130	-1	2566079	1.2	cynT	Carbonic anhydrase	TGN-10	2.45623675806	31	TACAAGATTTATAGTAGAGTAATAATCTTATAAAATAATTTAATAAATATAAATTAAATTATATGTGTATATATTGTACTTTAATAGTGATATAATAATA	CD2213-CD2212.1
CD630_22140	1	2566722	2.88	sinR	Transcriptional regulator	box -10		13	CACTTATTTCAGTATAAAAACATATATAGTCTATATTTAGACTAAAAAAGTATAAATAGTCTATATAAAACAACTTAAACTATGAATATAATCTAAAGTG	CD2214-CD2215
CD630_22200	1	2571683	13.51		Putative cyclic nucleotides-binding protein	TGN-10	3.26777582822	25	GCAGAAAAATGACAACTGGAAAATAATAATGGAATAGTTTCTATGTAAATATATTTTTACTATCTTACCTAACTAATTGAAAGATGATATAATTTAATCA
CD630_22210	1	2572429	7.43		Oxalate/formate antiporter. pseudogene	TGN-10	1.93906550631	88	TATAATTTCAAAAAAGTATTGAATAATAATTATTCAATGCTTTTTTATTTCGGGTCAAGTGACCTATTTTTTTTTATTTCTTCATTATATAATACTCCTA
CD630_22280	-1	2579307	2.41		Conserved hypothetical protein	P-SigA	2.627	85	AACAAAAAACATATATTTATGAATTTTATATGAAAATAGTTAAAATATTGATTTTTTTCATTGGTTGAAAAAACAATTTACTTAGGATAAACTATAATAG
CD630_22330	-1	2585412	3.92	asrA	Anaerobic sulfite reductase subunit A	box-10?		13	TTTTATTATTTTTGAAACTGTGATAATTATCACGGAAGCATAGAAAATAAAGTGTTAAGATTTAAACAAGATAGCAAGTAAGTAAAACTAAAATATAAGA	CD2233-CD2230
CD630_22410	-1	2593099	4	nanE	N-acetylmannosamine-6-phosphate 2-epimerase	P-SigA	2.59846976014	43	AACAAGCTAATATATAAAATAAATCAGTAAAAATATAGATGTGAGAAAAAAATATGAAAAAATATTGCAAAGAAAAAGTTTTCATGTTATTATTAATACA	CD2241-CD2240
CD630_22440	1	2595753	4		Putative diguanylate kinase signaling protein			-128	TGGATTTCCTCTAGACAAAAAACACAAAGACAATGTTGAGAAAGAACTCTGCAATTATCTTTATCATACGGGTAAAATCATTTGCATAATAATAGTAATA
CD630_22450	-1	2598701	16.38	asnC	Asparaginyl-tRNA synthetase	P-SigA	4.1478512099	331	TATCATTATGTAAGGTAGAATTATTATATTTTAAATAACAATCAGTATCAATTATATAAATTTATTGACTAAAAATTTATAAATTGGTATAATTTTGTTA
CD630_22451	-1	2599068	14.58		Conserved hypothetical protein	P-SigF/ P-SigG	3.56/ 2.98	25	ATAGGTATAAATTAAGTATTGAAAAGATATGATGTTAATTTAAAAATCATTATAATTTAGACTTATGAATTTTATTTGTAAAATTGCTAAAACTATTACA
CD630_22470	-1	2604416	2.14	cspBA	Subtilisin-like serine germination related protease	P-SigE?	1.663	19	TTATTTTTTTTAATATATCTATTATAAATTGTATAACTGAAACTTAAAAAATTATATAGTCTAATACATTTTAGACTCACACAAAACATATACATTAATA	CD2247-CD2246
CD630_22510	1	2608246	1.47		Conserved hypothetical protein	TGN-10?	1.88184957186	66	ATACAAATGGAATAAAAATACAATTTAATTACGATTTTGTAATCAAAAGTTACAGCTGTGTAACTGTAATATTATTCTCTTTAATGGTAATATTTAATTA
CD630_22590	-1	2617195	26.36		Conserved hypothetical protein with RmlC-like jelly roll fold	TGN-10	2.09889785084	75	TGTAAGATAATTTAATTAAGTCGAAATATATGTAAAAATAGTATCATTTTTGTGTATTCAGTAATATTTTTTTATGATAATATATGTTATTATTATATTA
CD630_22600	1	2617332	4		Transporter. Major Facilitator Superfamily	P-SigA	3.99999500024	46	ACTGAATACACAAAAATGATACTATTTTTACATATATTTCGACTTAATTAAATTATCTTACAAGTTGACGTCTATATGAAAAAAACATATACTCATATAG	CD2259-CD2258
CD630_22630	-1	2624165	1.58	prsA	Peptidyl-prolyl cis-trans isomerase. PpiC-type	box -10		291	AAATGATAAAATTGAAGCATTAAAAATGAATTATAGATTTGAATGTATTGATGAAGAATATGATGAATATTTTAAAAAATATAAGTCTATAATCAAAAGA
CD630_22640	-1	2625047	4.1		Conserved hypothetical protein	box -10 ?	1.86255931492	19	TTTCTTTAAACATGGGGAGTATCATATCAAAAACATATGAAAATTAAGTGATTTATGAGAACAGTAATATTTTATATGATAGTATAGAATAGTAATAAAG
CD630_22660	-1	2627687	2.36		Putative oxidoreductase. FAD dependent	P-SigG*/ P-SigF	2.489/ 2.32	26	AAAACAAGAAAACTAAGTGATTTTTAATTTAGCTTTTTATTAAGCTTATTTTTTATACTATTTATAATAAATAAACTCCATGATGGGAAAACTATTACTA	CD2266-CD2265
CD630_22720	-1	2635158	1.48		Putative protein-tyrosine phosphatase	TGN-10	2.71139065537	47	TAATTTTGTATAAAGAGATACTTTTATATTTTACAATTAATAACCAAATACTAAAAAATATTTTAAATAAAGAACTTAAAATTGTGATAAAATTAATTTA	CD2272-CD2271
CD630_22740	-1	2637883	3.73		Conserved hypothetical protein	TGN-10	3.06687172541	32	GCATTAGCTAAGCTAAAAAACAAATAATTTTAAAGTTATTATTATACACAATTATAACTTTAACTGTATATTAGTTATATGTACTGATATAATATAGTG
CD630_22750	-1	2640156	4	topB2	DNA topoisomerase III	P-SigA	2.10022640826	79	TACACATACAAATGAAGTGTAAAATAAGTTTTAAATAAAAAAATAATAAAATCTTAAATAATTAATTAGATATGATTAAATTATGGTAATATTATAGTTA
CD630_22760	1	2640392	1.28		Sodium:alanine symporter	P-SigA	2.49752358895	331	TAAGTTTATAATTCGTAAATAGGCTTACATTTTTATATTTTTTCTTTGTTTTTTAATTTTTTAGTTGACAAAACATAAAAACTTATATTAATATTATTAA
CD630_22780	-1	2643684	4	araD	L-ribulose-5-phosphate 4-epimerase	box -10 ?		10	TAGAAATATAAAAATTTAATAAAAAATTCTAAAAGCAATTAAATTTTATAACTATGACATTAAATAAAATAAAAATAATTTTCTTAAATAAAATATAGGA	CD2278-CD2277
CD630_22890	-1	2657781	1.97		Two-component response regulator	P-SigA	2.70721754773	32	ATATAGTTATAAGGGAAAGTTACAAAAATGTAAGCCAAAGTAATATAACAATTTAGTCATTGTTGAGAAAGGGAGTGAAAGATATTGTATAATATAGATA	CD2289-CD2288?
CD630_22890	-1	2657872	4.93		Two-component response regulator	box-10?		123	ATCAATTTATTCAAATAAACCTCAATTTATCTTAAATCTTAAGAAATATTTAAGAATTAGGATAATATTTTCTTAAGATTTATATTTTATTATATAGTTA
CD630_22940	1	2660150	1.92		Conserved hypothetical protein	TGN-10	3.24902389334	32	GCTTTATTATTACAATTTTTACTATAGTTTTATCTATCCTGTTAATATTTGTAATATTTTAGATACTCTTTGTACTTGTGTTACTGATATACTTTGATTA
CD630_22950	1	2660606	1.87		Putative membrane protein	P-SigA	2.24982389355	29	TATCTTATAAATAATAAGCCTATCATTATACTCTATTTTTAGCTAAAATCGTTCGACAAATTGCTGATATAAGTTCTTAAATATGCTATAAATTAAAGTA
CD630_22970	-1	2662782	4		Putative phage-related regulatory protein	P-SigA?	2.25979887195	329	GTGCTTTTATTCTGCTCAAAATTGGTCGGTTGGGTAAAATCATTAGAAAAAATTAGTAAAAACCTCTTTTCTGTAACTCGTTACAATATTATTATTAATG
CD630_22991	-1	2665491	5.12		Putative phage protein	box -10	1.5182972016	88	CTTACAAATATGTAGGTGCTTTTTATTGAAAAAATAGAAAATAAAATAAAAAGTAAGATATAGGAAAAATATGTAAGAATTATATATTATAATAATTGTA
CD630_23010	-1	2666345	4.08		Conserved hypothetical protein	box -10	1.57857061043	55	AGGTAGAATTTAAAGTTAAAATAGTTACATTGCTAATATATGAAAATGTTACAATTTTGGAAATAGATGGATATATATGTTGTATAGTATAATGTAGATA	CD2301-CD2300
CD630_23090	1	2671800	6		Conserved hypothetical protein	P-SigA	1.81266223608	150	CTTTTTATTTTTTCAGATAATTTAACGTTCATATATAAATTTATTAATTTTTCAGCTAGATATGTTGAATAATAACTAATTCTATTGTATTATTAATCTG
CD630_23100	1	2672296	1.27	cspD	Cold shock protein D	P-SigA	3.43075048236	56	TGTTTAAATTTATTTTCATATTAAGAATAAATAAAAATGTTAACTAAAAATTATAATTAAATAGACATTTATGTTAATCTATGATACAATAGTATTTGTG
CD630_23160	1	2677769	3.76		two component system	P-SigE	1.92049758869	100	GATTACCCTAGATATTTTCATAAACTTTTACCTTCAGATTAATATGGGCATCTATACTTTTAAATTTACTATATGCATTGACAATATATTAAAAGTACTA	CD2316-CD2317
CD630_23210	-1	2684375	3.59	tkt'	Transketolase. central and C-terminal	P-SigH*	3.41633544834	72	TGCAGTTGATGAAGCTAAAAAAGTTACAGGAAAACCAACTGTAATAATAGCTAAAACAGTAAAAGGTAAAGGTGTTTCATTTATGGAAAATAATGCTGCA
CD630_23220	-1	2685165	2.41	tkt	Transketolase. N-terminal	P-SigA	2.04619751927	47	AGGTATTACAGCTTTAATGAACGGGGAAGAAATAAAAGTAGCAGTAAAATCTTAAAAAAACATTTGTATTATTTTAAAAAAAATTGTAAAATCTACTGTA	CD2322-CD2321
CD630_23270	-1	2689595	3.84	gatA	PTS system. galactitol-specific IIA component	P-SigL	5.87863871333	45	GCTAAAATCCTGGAAGAGAGCATTATTTTTGGGAAAACATTTTCTTTTGTTTCACAAAAAAAGCCACTTTTTGGCACACAACATGCTTTATATAAAGTCA	CD2327-CD2325
CD630_23300	-1	2694785	3.92	xpt	Xanthine phospho-ribosyltransferase	P-SigA	3.01055297496	284	TTGAAAAAAAGTAGTTCTGATAAAGTAACTATAATATATTATTCTACACAGTTTGAATTATTTGTTGAATAATAGAGAATTATAATATATAATTAAAAGG
CD630_23340	-1	2700131	6.16	mtlA	PTS system. mannitol-specific. IICB component			30	ATGTCATTATCTAAAGTGACATAGAAACGGTTTCTTAAAGTTGTTACTATAAAATATAAACTCTATAATAAAAGTATAACAAAAGGGAATCATATCGATA	CD2334-CD2331
CD630_23350	1	2700655	4	guaB	Inositol-5'-monophosphate dehydrogenase	P-SigA	2.18989383191	42	TATTAAACAAATTTAATTAAAATAGTTTAAATTTTTCAAAAATCTCAATATTTGACAAAATACTTTAATAAAATTAAAGAATAAGTTATAATTAATACTA
CD630_23440	-1	2713981	4		Putative membrane protein	TGN-10	2.66745323438	302	GTTTTGTATATTGTTGTAAAAAAATAGAATAGTTTTAAACTATCATAGCATAAGTTTTTGATATTTTCAATCTATTAAGAATAGTGCTATTATTAAATTA	CD2344-CD2338
CD630_23470	-1	2717022	12.81		Putative Xaa-Pro dipeptidase	TGN-10	2.98480081642	31	GAAGTATTAAAAAAAATGAAATTAATAAAATATGAAAAAATTTTAGGAATAAAGTATCTGTTAGATAAAAATAAGATTAATTAGTGATATAATATAATTA
CD630_23570	-1	2725855	9.41	grdX	Putative glycine reductase complex component	P-SigA	3.37855689752	290	ATGCAATATCAACATTTGGAAAAAAAAGTAAAAATGTATACAAAATACATATAAAAAAACTATTGCAAATTTTATAGAATGTTTATATACTTAAGTCAAC	CD2357-CD2348
CD630_23580	-1	2727188	3.4		Oligoendopeptidase-related. clade2. M3B family	P-SigA	1.89950028205	-612	AAAACAAGAGAATTAGCAAACAAAGCATATTATAATTTCTTTGAAGAAAATGAAACTAAATTTGATGACATATTTGATAAATTGGTTAAACTTAGAGATA
CD630_23590	1	2728198	1.5		Putative hydrolase. HAD superfamily. subfamily IIB	TGN-10	3.76877354003	95	AAAGTTTTTACATTCTCATCTCACATAAGTAATATTTTTATCAAAAAATTAATATTATTAAACTTTCTAAATTACTTATCTCTTGATATAATAGTATACA
CD630_23650	-1	2733450	1.52		ABC-type transport system. nitrate/sulfonate/taurine. SBP			133	AATAGCCACTATATAACAAAGCCAATACCAGCACCTATAGAGAATCAAACTATAACCTTTAAAAATATTGATGATAAAGCACCAATAGAAGTAATTGTAT
CD630_23690	-1	2735641	2.58		Conserved hypothetical protein	P-SigA	2.5149818393	47	TCAATAATTTAATAAAAATAGATAAATACTATATACACTTTTAATAATATAGTTAATATCTATTTTACAGATAAATAAGAATAAACTTATAATATAATTG
CD630_23730	1	2739162	2.17		Putative CstA-like carbon starvation protein	P-SigA	2.90111992641	151	ATATTTTTTAATTTTTTTGTAAAATATTATCAGAATTTTGTTTATATTCTTTATTGCTATAACATTGAAAATATTACCAAATACCTGTATACTAAGTACA
CD630_23750	1	2741458	4.63		Conserved hypothetical protein	P-SigG	3.18888778517	23	AATTTAGGAAGGGAAACTTCCAAAGATGTAGTTGTTAAATGTGATAAATGTAATTGTAAATAAGTGTATAAAATTTAGATAACTTCACATAATAAGTTTA
CD630_23790	-1	2745726	2.08	buk	Butyrate kinase	P-SigA	1.89888547332	38	AATTATAAGTGAAAATGTTAAACCAAAATTTGTTGAATTAAACATAAAAGCTTTCCATGAAGGTATGGAAATGGTTAGCAAATAGTTTATAATAGATATA
CD630_23820	-1	2749455	19.27		Putative pyridoxal phosphate-dependent transferase	P-SigL	5.92496592461	30	AACACTTAATTTAATAATGAAAAAAATAATAATTCTAAACAAAATCAATTTTACATAAAGTGGGATTTATTGGCATAGTAATTGCTTAATATATAATGTA	CD2382-CD2379
CD630_23861	1	2756216	4.15		Conserved hypothetical protein	P-SigA	2.83383927477	96	CTATCTTAATTAATGATTTTAAAATCCAAGTTTGCACTTTGAACATCCAGTTTCCCAAAATCTATTGTCAAAACTCACTTTAGTTATTAATATAATGATA
CD630_23900	-1	2760100	1.71		transcriptional regulator. beta-lactams repressor	P-SigA	3.70561935679	28	ATATTGTAAAAAAATTAGAAATTTAACAAAAAGTACAAAAATTCACATTTTTTTCATAAAGTGTTTGACTAAAAAATTCACATGTTGTAGAATTAAGGTA	CD2390-CD2388
CD630_23920	-1	2761912	6.96		Putative tRNA-binding protein	P-SigA	2.29849522851	-279	GTGATTAAAGTATGGAGAGAAGCATTTAAAAAATTTAAAACGAAAAAAGGAGCAAGGTCTTCTATTGAAGCATTATTAAAAAGAGTTCATAATGGAAATA
CD630_23960	-1	2766045	9.28		Conserved hypothetical protein	P-SigA	2.23091369168	104	ATATACTTTATAATCAATATATTTTATCTATATTTTACACTTATAAAATATGAAAACTACTTATTGCGAAAGTAATTGATTTGTTGTATTATAATTTACA
CD630_24030	-1	2771732	2.6	dut	Deoxyuridine 5'-triphosphate nucleotidohydrolase	box-10	1.9367797186	23	CAAGTTTCATAAAAAATCCTCCTTTAAAACACTAATAATTATATTACCACAAAAAAATAAAAAACTTCAAGAGGTCGAAATTTAAGTTATAATATTTATA
CD630_24090	-1	2781176	6.06		Conserved hypothetical protein	P-SigK	2.99243483516	27	TAAGTATTTATAAATTGAATATAGGGGATTTTTATTATAAAAATTTAACTTATATAGTTGTAAGTGAAACGTATTTAATTATATTGCATATATTATTGTA
CD630_24120	-1	2785558	5.65		Putative negative regulator of gluconeogenesis	P-SigA	2.27128698053	44	TATAATAAATATCTTTAAGCGAGAGAACTTAGTAAAAAATATATCGTATTCAATAAAAAATCTGTTTACAGAATGGTATATATAGTTATATAATATACTA	CD2412-CD2410
CD630_24220	-1	2797373	4		Sodium:alanine symporter	P-SigA ?		106	CGTTAAAAATTTTATAAATTTATGTTTAGATATGATTAATACTCTTGATTTTAGAAATAAATATTTGTAGATTGTAGATTAAAGATAATATAAATAAATA	CD2422-CD2421?
CD630_24260	-1	2802498	6.25	buk1	Butyrate kinase 1 (BK 1)	P-SigA	2.00847206255	96	AATGTAGAAGCATTTGAAGCTGGATACGACTACGAATGAATATTTTAAATATTTAAAATAATTATTGAAATACTTATTTTTATATGTTAGTATTTAATTA	CD2426-CD2423
CD630_24291	-1	2805182	1.04		Putative 4Fe-4S ferredoxin. iron-sulfur binding domain protein. delta subunit	P-SigE	1.559	47	TGTGTTATCTTTTAATTAAGCAATAAAAATAGAACAAGGTTCTATACTATAGAACAAAATTGATGCATATATAGTATTTATACAAAATATAAATATTATA	CD2429.1-CD2428
CD630_24300	-1	2806340	4		regulator. IclR family			155	ATAAAAATATATCTATTGTATAATAGATATATATATTATTATCTAGTCAGGATAAAAATATAACAGAATAATTCTATTAAAAGTAAGAATAATAAGGACA
CD630_24300	-1	2806231	1.5		regulator. IclR family	P-SigA	2.00700399321	46	TTTTGTTTTTATTTTACAAATTAAGTATAATATTTTTGTTTTATAAAATATAATTAAGATAAATAGATAATTTTGTAATTTTAATATATAATATTTAGTA
CD630_24330	-1	2811188	5.02	glyQ	Glycyl-tRNA synthetase alpha subunit	P-SigA	3.53643223138	66	AAATAGATATAAAGTGACTTTTAAAAAATGAAGAGAAGATAATTATAAGAATTATCACTAACATTGACAAATTTTATAGAATTTGATATTCTAAAAGTTG	CD2433-CD2432
CD630_24351	-1	2812796	6.24		Conserved hypothetical protein upstream recO			28	TGGTATAGCAGTTTACTTTATAATAACAACGGCATTATTGTCAAAAATTGTTTAATAACTTTATGTATGATTTATCCTCTTCTTACTAAAAATATAAGTA	CD2435.1-CD2434
CD630_24400	-1	2816931	6.39		Putative metal-dependent hydrolase	P-SigA?	1.5791310956	36	GCACGACAAAAGAGAAGAATTTAAAAAAGAAGAACGTAAAAAAGCGAAAATGCAGGAAAAGACTTTCAAAAGAAAGTAAAAGTGTAGTAATATAGATATA	CD2440-CD2439
CD630_24430	-1	2819700	1.52		Conserved hypothetical protein	P-SigK*/ P-SigE?	2.749/ 1.351	96	TACGTTTAGATTTTATATAAGAAAAAATAAAAAGGTAATCATGTTGATTTTTTATCAATATGATTACCTTTTTCTTGTTTAAATAATATATTAGATATTA	CD2443-CD2442
CD630_24450	-1	2821093	5.22		transmembrane signaling protein. TspO/MBR family	P-SigE	2.96282226504	29	AAACAAAACTTACAATAGATTGATATAGCCTAGAGAGAAATCTCTAGGCTTTTTATAGTTTTTGGGAATAACGAGTCATATTTGAGCATATCTATAATCA
CD630_24461	-1	2821912	2.21	rpsU	30S ribosomal protein S21	P-SigA	2.98620199166	85	TTACGAAGCGGGACAAAACTAAACTAAATTATTGAAAAATTGAGTTCCTTCTTGATAAAAATACTTGATAAAAGTAAAAATTTAGTTTATAATAAACAAA	CD2446.1-CD2446
CD630_24461	-1	2822125	6.72		30S ribosomal protein S21	P-SigK*/ P-SigE*	2.552/ 1.79	298	AGTTGTACCTAAAAAACATTATGATAGTTTAATTGATATTCCTGATAAAGAGATGGACATTGTGTCACATATTCATGTTGTTATTAATAAAATAGCTAAA
CD630_24470	-1	2822361	8.92		Putative histidine triad (HIT) protein	P-SigH	4.50003155876	21	AAAAATATACAAGGTCAGATATTAAAAGTGAAAATAAATGATGTAAAAGATGAATATGTAGAAGGAATTTTGCTATAACATGTAGAAATTATAATATTTA
CD630_24500	-1	2825450	2.08	prmA	Ribosomal protein L11 methyltransferase	TGN-10	3.34144299032	43	TTTAAATATTCTGACTATTATATAAGGATATTATTAGCTTGAATTTAAAACCAATAATATAAAACAACAAAATATTATATTTATGATATAATAAAAGTTA	CD2450-CD2448
CD630_24590	-1	2837565	7.79		Putative glucokinase. ROK family	P-SigA	2.2672650747	42	GTAAAATATACTGTGAGAGGATGTTTTTGCTTTGTTCATAAACTTTTATGAAAAATTTGCATAGTGTAACATTTTAATATACTATATATATAATAAAATA	CD2459-CD2458
CD630_24590	-1	2837573	8.34		Putative glucokinase. ROK family	P-SigA	2.38553799052	50	TTCTCATAGTAAAATATACTGTGAGAGGATGTTTTTGCTTTGTTCATAAACTTTTATGAAAAATTTGCATAGTGTAACATTTTAATATACTATATATATA
CD630_24591	-1	2838301	13.42		Conserved hypothetical protein	TGN-10	3.65444448185	24	TTTTTGTATAAAAAATAAATGTGCATAAAATAAAACTGAATATAAATAATTTTCTGAAAAATACTTGTCCTAAAATATATAATGTGCTATAATATAATCA
CD630_24600	-1	2839741	1.5	dnaJ	Chaperone protein DnaJ	P-SigA	3.82596765694	99	TAACACTAAATGATAATTGGAACATATATGATTTGTGAAAATCATATAGATGTTAAAGATATATGGACAATATACATCATAAAGAATATAATATATCATA
CD630_24630	-1	2843518	5.85	hrcA	Heat-inducible repressor HrcA	P-SigA	3.90165194685	56	CTCAAAAAGGAAGAGAAATATCTAATAGTGTATTTATAGAATTTATGGAATAATTTTTAAGGTGTTGACAAAATAAATTTATAATGGTATATAATATATA
CD630_24650	-1	2846279	3.07		Putative amino acid/polyamine transporter	P-SigG	2.68655051667	54	AATATTTTAGAAGTTACGATTGTATGATTTTTAAATGCATAGGCATTTACTCTAGGACTATAGACTAATATAAAAAAAAACTTTGGGAATACTAAAACCA
CD630_24660	-1	2847850	4		Putative tRNA-nucleotidyltransferase/Poly(A) polymerase family member	TGN-10	2.19415871112	46	GAGTAAATCCTTATAAATTTAGATAAAGATATTTAAAAGCTAGAGTGATTTTAGAATTATTTCTAAATTAGTCTAGCTTTTTTATGGTATATTTTAAGTA
CD630_24700	-1	2852330	4	gpr	Spore endopeptidase	P-SigF	3.7386721446	27	AACCCAATTTTCTTACATTGAAAGCCTTAATTTTACTTGTTTTAAATAAATTTACAATTTCTTGTTATAAAATACTAAATTTTGTTAACAATTATAATTA	CD2470-CD2468
CD630_24720	-1	2854002	8.29		Transcriptional regulator. ArsR family	P-SigA	2.91777445607	25	GTGTTTATATAGAATAGCATTTGTAGCATTTATTATAGTTGTAATTACTATTTATATCATAGACTTGAATAGTCTAAAAAAATAGACTATAATATTTTTA	CD2472-CD2471
CD630_24730	1	2854533	15.92	rpsT	30S ribosomal protein S20	P-SigA	2.53081640535	43	ACACAATTTACAGTCTAAAAAATCAAAATAAAAAACATTATTAAAATATATAAATAATAATCCTTGATTTTTAGATTTATTTCTGTTAAAATCTAATATG
CD630_24790	-1	2861445	7.64		Putative molybdenum cofactor biosynthesis	P-SigG*	3.22538525795	32	TAATTAAAAGATACCTTTTTAAATTTATTTTAAGATAATTTATTTTTAATAATATATAATGTTTTGTATTATATAATGTAAATTTTCTAATACTATTATA
CD630_24800	-1	2862836	17.7		Putative hydrolase	P-SigA	4.36434807288	93	CTAATAGAAATATGCTTAAATGGTTGAAAAAACTATGTATGCATATTTCTATTTTTTTGTCAAGTTGACAACTCTTGAAAAAATAGTTACAATTTAGTTA
CD630_24820	-1	2864103	3.08		Putative lipoprotein	TGN-10	2.09300075061	29	GAAAATAAAATTAATGCTAAAATCAATATCACAAAAATAAATGTGATTTTTTTCTTATTCATGGTATATTCCTCCTATGAAATTGTGTTATTATTTTATT	CD2482-CD2481
CD630_24830	1	2864111	4		Putative lipoprotein	P-SigA	3.14649316535	30	CCCATAACATGCTGTAATAACAACCAAAATGCCTAAAATAAGAAGAATGTCTTTTTTCTTCATTTTTTGTCCTCCTATGAAATTATGTTATAATAAAATA
CD630_24900	-1	2873294	4		Putative peptidase. M20A family	P-SigG*	2.63184401152	23	ATTATATATAAATAGATTATAAAATCAATAGTAAAAAAGTTTTGTCCCTTGAAATGACATAAAGTATAAGGAGTTATTAAATAAGATAAACTATGATATA
CD630_24910	1	2873401	6	pmi	Mannose-6-phosphate isomerase	P-SigA	2.10031246643	34	AGTTTATCTTATTTAATAACTCCTTATACTTTATGTCATTTCAAGGGACAAAACTTTTTTACTATTGATTTTATAATCTATTTATATATAATTATTTGTA
CD630_24960	-1	2881861	1	selD	Selenide water di kinase	TGN-10	2.11240733695	43	TGGTATTGGAGATAAAAAGTATGAAAATATAAAAGATTTAATTTGTGTAGACTAAAATATAATACAAAACTTACATATAGATATGTTATTATAAATATGT
CD630_24970	-1	2882627	3.92	comE	Competence protein ComEA	P-SigF	3.22493569006	17	ATAAACAGATTAATAAAAGTGATAAATTTCTTTTCATTGTGAGCCTCCAAATTTTAAATTCATCTTTTAGTATAGCATATATTTGTCAATAATTAAAAGA
CD630_24990	-1	2884487	4		Conserved hypothetical protein	P-SigA	3.59950840375	43	TATTTAAAATAAATACAAATAAAAAATTATTATTAAAATGATAATTAATATCAATAAGTATTGACAAAATTATTTCTAAATACTATTATATATAATATAA
CD630_25000	-1	2886324	2.87	argH	Argininosuccinate lyase	P-SigA	4.11117394659	315	ATAAATTCCTAGAGTTAAAAGAATCACTTAGCTCTTAAAACAGTATATAATAGGAAAAAATAGGTTGACTATTTTGTAGATAGTAATTATAATACAAATA
CD630_25010	-1	2887272	1.78		Putative hydrolase. HAD superfamily. IIB subfamily	TGN-10	2.99444763737	65	CAAGAAACGATTTATTTTGCTCTTAAAATAAGTTAAATGAATGTTATTAATTTTGTAAATTGAAATAGTTTAAGTATAAAGTTATGATATAATCTAATAA
CD630_25030	-1	2891613	4.51		Putative cation-transporting P-type ATPase	P-SigA	3.17919207295	246	GAATATTTACATATAAATTAAGAGATGGTTTGTTAAAATTAGGTTAAAATAAAAAATAACCTAGACTATTAGCTGTGTAAAGTGATATAATGTAAATACA
CD630_25040	-1	2892398	1.08		Putative D-alanyl-D-alanine carboxypeptidase	TGN-10	2.7589261692	59	AAAAATTTGTTGTTATTTTTAGTCGTATAAAAAAGAAACTTAAGAGTTTCTTAAGAATTGTTTAAAGAAGTTGCAATAAATTAGTGGTATGATTATAGTA
CD630_25050	1	2892559	4		Transcriptional regulator. TetR family	P-SigA	2.18135984873	59	TTTCTTTTTTATACGACTAAAAATAACAACAAATTTTTCAAAAATTTCATATTACAGTCTATATATTGATTTTTTTTCCAAATGATGTATAATATATTTA	CD2505-CD2506
CD630_25120	-1	2901176	2.06		PTS system. glucose-like IIA component	P-SigA	3.46334309279	117	AAATAAATCACAATAAAGAACATGATAAATATTGTCGAATTAAAAAATAAAATTAAAATAAATATTGCAATATTTTTGAGAAGGTTTTATAATGAGTATA	CD2512-CD2509
CD630_25130	-1	2901772	3.16		Putative translation inhibitor endoribonuclease	box-10	2.32512763991	49	GCTAGAATAAAGAAAGCTATAGAAGAAAAAGGTTTTAAAATTATAGAATTATAATAAAAAGTGTATATAATATACAAGAAAAATAGTATAATAGTGTATG
CD630_25140	-1	2903077	20.84	tdcB	Threonine dehydratase II	P-SigA	2.54089905298	42	ATGCAATTGTTGTATTTTTAGGTTTTTTGTGATTAATTAAAAAATTATAAAAATCGTTTACATGTTGATTTTTAAAAAAAAAAGATATAGAATTATATAG
CD630_25150	1	2903623	4		Putative L-aspartate-beta-decarboxylase	P-SigA?	1.99051729193	71	AAAGGTATTTTTTATTTTAACATATATTTAATAAGGCTAAATAGAGTTATTATTTTAATTTCATACTTTACTTTTTCTATAAACCTATTATAATTAAAGT	CD2515-CD2516?
CD630_25171	-1	2908424	5.45		Putative phage protein	TGN-10	2.37260753587	91	TTACTTTAATAGTAGGTGTTTTTTTGATTAAAAGAATATTATTATAATGTAAAAAGTAATAAATAGGTAAAATATGTAAGAATTATATGTTATAATATTT
CD630_25180	-1	2910156	2.81	cwp29	Cell surface protein	P-SigB	1.99144173751	94	TTGGTTTTATAAAAGAACAGTTGGACTGCTCTAATTATGTCATTATCTTTTTAATTCTTTACAGTTACATTATAACACGTATTTGTATACACTTAAATTA
CD630_25190	1	2910194	4		integrase	TGN-10	2.967624684	82	ATATCTTAATAATTCTACATTAAATTTTCTTTTCCTCCTTTAACGATATTTATCTTCCTGTTAATTTAAGTGTATACAAATACGTGTTATAATGTAACTG
CD630_25220	-1	2916391	5.56		Conserved hypothetical protein	TGN-10	3.49312345032	34	AAGAAAAGTTATTATAAAAAAGCTATATAAAGACAAACATATTAATAAATTTAAATTTGACTATGTTACAAAATCGTATTAATATGTTACAATAACTAAG
CD630_25240	-1	2917759	5.66	nadD	Nicotinate-nucleotide adenylyltransferase	TGN-10	4.26456281927	23	TTATTTTTTAAAGTGTTTTTTAGCATATAAATATAATTATATACCCAAAAAAACAAATTATAAGCTTTAAGAAATAAAAAATAATGGTACAATAGTATTA	CD2524-CD2523
CD630_25270	1	2920950	3.12		Transcriptional regulator. TetR family	P-SigA	3.37876777426	30	AAGGCAAAAAAATAAAATAATGAAAGCATGGCAATATACCTGTTCAACATGCTAAAAAGACACATTGACAAATCATTATGTATTTGCTAAGATAAACATA
CD630_25320	-1	2925593	1.77		Aminotransferase. alanine--glyoxylate transaminase	P-SigA	1.95175151048	27	TAATATACTGATATTATTCATGTTAGAAAATGTACCGGTACAATTCTAAAAAAGTATAAAATTGTACCATATAAAATGAAAATTTTGTATAATAATCGTA	CD2532-CD2531
CD630_25390	1	2934428	6.63	rnz	Ribonuclease Z	TGN-10	2.4193680967	60	TTTCCAAATTTTTATACATTTCTATATAAAAACTTTATTTGACAATATTTCTTGACTCAAATACACATTTATTGTTATATTTAATGTTAAAATAATTATA
CD630_25410	1	2937185	4		sodium:glutamate/aspartate symporter family	P-SigA	3.69979782152	37	GTACTTAATCACATTTTTCAAAATCAACTTGTTTTACTCTATTTAAGTAAATTGTGATATAATATTGACATTTTTTTAATATATTGATATCATTTAAACT
CD630_25460	-1	2945802	4		Endoglucanase (cellulase)			39	TTAGTTTTTTAGTTGTATTCAATGTTTTAAAACTAACTATAAACGCTATAAAGTTTATAAATGACAATAATTATATATAACATGATGTACTTTAATTTGC	CD2546-CD2542
CD630_25500	-1	2950971	1.57		ABC-type transport system. sugar-family			23	GTGTAGAATTATAATGAAAAAAGAAAATAAAAATAAAAAAAGAAAATAAAAATAAAAAAAGAAAATAAAAATAAAAAAAGAAAATAAAAATAAAAAAAGA	CD2550-CD2547
CD630_25540	-1	2954772	4	tlpA	Transposase-like protein A			73	AGTTAAGAACTTACGGTTCTTATATATGTTATTTAAAAATAAATATAAAAAACCTTCAAAATACTTGTTTTAAGTAATTGCATATTTTAATATTATGATA
CD630_25590	-1	2959650	3.1		Conserved hypothetical protein	TGN-10	2.57344642994	33	AAGAAAACATGGCACTCAAAAAAGAAATTATAGATAAATTTAAAGATACATTGAAAGAAATTTCATTAAATTAATTTTAAATTGTGTTAAAATATTACTA	CD2559-CD2557
CD630_25620	-1	2963867	2.39		Conserved hypothetical protein	P-SigF*	2.76050804813	41	TATCCAAAAACTTTTCTAGGTTTAAATTATACCATATTTATAGTATGATATGATTATAATTTTATATAATAAATAAGTAAAAATAGTAAAAAATAAATTA	CD2562-CD2561
CD630_25621	1	2964142	3.06	rpmB	50S ribosomal protein L28	P-SigA	1.6337946282	45	TATATATAATTTTATATGATAATAAGAAATTCTTCAATATGTGTAAGGCAAATATATATTTCTATTGCAAATTTTTGTTATTTATGATAATATAAATATG
CD630_25622	-1	2964729	6		Conserved hypothetical protein			42	AATCTATATCGGAGTTCAGTAATAATTCTAGTATGAAAAATTAAAATTACATAATGTGTTTATTGGTCTAAAATGGAAAACTGTCGCATAAACTTGAATA
CD630_25640	1	2965464	4		Transcriptional regulator. MerR family	P-SigA	2.40276645467	16	ATCCAGTAAAGATATTTTTTTATATTTTTATTAAAAGATATAAATTTTTATATTTTAATGTATTGACATTTACGTTGCGTAAAAGTGTATATTTAATTTA
CD630_25710	-1	2976797	4		Two-component response regulator	P-SigF*	2.66728981045	57	ATTAAATTTAAACTAGAAGGAGGTTTCTAAGATGGACATTAAATACAAATAACCAGAACAAAAGATATAAATATATATATAAATGGAAAAACTTCTATCA	CD2571-CD2570
CD630_25730	-1	2978529	7.74		Putative hydrolase. HAD superfamily. subfamily IA	P-SigA ?	1.19	35	ATAAAATTTGATTTTGACAATTGGTTTTATATTGTAGAGCAGATACAATCAAGTAAAATATATTTATGATTGTATCTGCTTTTTAGTATATAATTATAAA
CD630_25900	-1	2996564	7.16	dapF	Diaminopimelate epimerase	TGN-10	3.45641520496	29	ATGGCAACTCTCCCTCACATCCTCAAATTATAGTTGTCATTACAAAACTTTTCCCATAAATTATAAGTTTATGGGAATTTTTTTATGTTATAATAGTTTA	CD2590-CD2587
CD630_25930	-1	3002009	2.33		ABC-type transport system. pristinamycin/multidrug-family	P-SigA	3.15388994252	215	AGTTGAAGAAGAATAAATTTAAAGAATAAGTTGTATATTGAATAACTAAAATTAGTTAATTTTCTATAGACATTTGTAATTAATGTTGATATAATGATTA
CD630_25990	-1	3007502	4		Putative transcriptional regulator	P-SigG*/ P-SigF	2.65/ 1.77	33	GGTTAAATGAACTAAAATTTTCATTTTGAGACATTCCATTTTTAGAATCAAATCTTATTTTTATTGTATGTTTAATTCACTTTTCCACATACTATTTTTA
CD630_26030	1	3012002	1.85	cdtR	Binary toxin regulatory gene	P-SigA?	1.94249681536	143	TTTATTATCTAAGTTAATATAAAACATATTATTTAATATAAATAAATTTTTTATAATAATATATTGATTTAATTTACTTTATTATTGTAAACTATAAGTA
CD630_26110	-1	3018036	1.41	mtnN	MTA/SAH nucleosidase	P-SigA	3.78501403941	298	TATGAAAAGAAAACAGCTAAATAAAATGTATTTTAAAAATTTCTTTTGGATATTATAATATATAGTTGACAATTTATAGTGTAAGGAATATTATAAAATA	CD2611-CD2610
CD630_26120	-1	3019674	4		Putative amino acid permease	P-SigF*	3.41926730454	159	AAATAATAAATAAAATTTTATAATAAAATAATATTGAAACAATTTTAAAAATTTAGTATCATTAGAATTAAAGTGGTAAAACTTTTAAATTTATCATTTT
CD630_26130	1	3019982	6.22		Putative peptidase. M24 family	TGN-10	3.41648257554	30	TAGAGATTAAACTTAATATAAAAAATATATAACAAATTTTTTTTATATTTCTAGAAGAAAAGTATACTCTTTTTTGTTTAATAATGCTAAAATTGATTTG
CD630_26150	1	3022196	4		Transcriptional regulator. TetR family	P-SigA	4.26206915198	35	CCGATTTAATTATTATTTTATATATTGAATGAAAAAAAGTCAATAGATATAGATTCTCGCTTTATTGACAATAAATATCCATAAGCTTATAATGTTATTA
CD630_26160	-1	3023286	15.06		Conserved hypothetical protein	P-SigA	3.33409727937	48	TTTAAGGATAAATTTCTTTAAGATTATATATGTTAATTATATATGTTAAAAAATGCCATATGTATTGAGATTATACCTAGTTAGATGTATACTGTAGTTA
CD630_26180	-1	3027981	1.28	ileS	Isoleucyl-tRNA synthetase	P-SigA	3.74134386349	341	AAAGATTAAAAATAGGATAAAAATGTAAGAAAAATAGAAATTATTATATTTTTCAAAAATATATTGACTATTCAAATTATTTGTTATAGAATTTCATATA
CD630_26270	-1	3035264	1.48		Conserved hypothetical protein	P-SigA	4.26263648103	110	GAGAAAACATATATAATATATGAATTTTCTAAATAGTATAAAAATAATAGAATATTGAAAAAAAATTGACAAATGAATGTATAGGTATTAAAATATATTA	CD2627-CD2626
CD630_26280	-1	3037487	4		Conserved hypothetical protein			88	TATAAAAATATAGCTACTTATTAAAGTGAAACGTCTGTTTGCTTTAGTAAGTAGCTTTTTATTTATAACAATTAATAAAGATACTTATATAAATTGACAA
CD630_26290	-1	3039083	43.97	spoIVA	Stage IV sporulation protein A	P-SigE	2.37032370943	26	TGTAGTTTACTAGTTTTTGTATATAGGGGAAATTAATATTGCTAGTCTTTATTTTTCTATTTTAAGAATATTAACCCTTAACTCTAAATATAATTTAATA
CD630_26360	-1	3046122	18.19		Conserved hypothetical protein	P-SigF/ P-SigG	2.630 2.390	18	AGTGAACTTGGCATTGGTAGCGAATTTATAGTTACAATATTACAAAAAAATTTCCTTAAATAGAAGGGAATTTTTTTTGTTTTTTGCACAAACTATATAA	CD2636-CD2634
CD630_26410	-1	3049708	27.8		Putative sporulation protein	P-SigE	1.708	20	GAGAAAATATGTATAAGTAATCCATGGACTGTAAACATTATTTTAATTTAAATGACCTATATAGGTCATTTTTTTTTACTTCGATACATATTTATTTTTA	CD2641-CD2639
CD630_26420	-1	3050598	25.84	sigG	RNA polymerase sigma-G factor	P-SigF	4.79096512381	33	TAATCTCAAGGTTGCAAAAAGAAATGAAAAAATTTGTATAATGCTAAATTAATTCTTCTTAAAAAGTATAAAAAAATTGGAAATGTAAATAATTTCAATA
CD630_26440	-1	3052270	1.02	spoIIGA	Sporulation sigma-E factor processing peptidase	P-SigA	2.18934057092	21	ATAAGACATATATCATTGTTCTTTTTAAATAGAATTTGTTTTGGATTCGACCATCAAAAGTGACATAAAATTTTGTACATACTATCTTATAATATGTTTA
CD630_26450	-1	3053898	4		ABC-type transport system. sugar-family extracellular SBP	P-SigA?/ P-SigK*	1.649	58	GAATTAAATCTAATAGGTATAGAAAAAAATATAGTTATAGGAGTTAGTATAGTTTTTTATGATTAGACAAGAGTAATCTTATTTGTTAATATTAAATCTA
CD630_26460	-1	3055360	6.4	ftsZ	Cell division protein FtsZ	P-SigH	4.50923864819	77	ATATATACGTAAATTATTTTATACTTAAAGAGTAATATTTGACAATATAAGTAAGAAATTTAAAAAGGAAAATTTACGTTTTTGTGGAATATGTTACTTA
CD630_26490	-1	3057423	2.08		Conserved hypothetical protein	P-SigA	1.58080635775	124	TATGTAAACTTAAAAAAAGAAAGCAATATAGAAATGCTTACAAGAAGTAATATAAAAATCTTACTTTCTAATGATGATAACTTAGATTATAATATATCTA
CD630_26500	-1	3058079	3.92		Putative cell division protein Fts-Q type	P-SigH	2.73787456326	17	ACCTTATTTGGATGTTATGTAATAAAATGCAAAAATTTGACTTTAAATATTATAATTTTTTTGTAGGAAAAACAAGCTCTAAAGGTGTATTTATTAACCA	CD2650-CD2648
CD630_26550	-1	3064609	20	murF	UDP-N-acetylmuramoyl-tripeptide-D-alanyl-D-alanine ligase	P-SigA	2.66385189606	95	AAGTATAACCCTATATTTTGAAAACTAAAAAGTAACAGATAATTAACATATACCCATAAACATCTTCAAAAAAACAGAAATATAGTATATAATTATAAAG	CD2655-CD2651
CD630_26550	-1	3065192	3.88		UDP-N-acetylmuramoyl-tripeptide-D-alanyl-D-alanine ligase			678	CTTATACTGACAATAAAGGAAATATAACTGAAACAGTAAAACCAAAAAAAGTAAGAAGTGTTATATCTAAAGAAACATCTAAAAAAATGTTAGAAATTGC
CD630_26560	-1	3066952	2.15	spoVD	Stage V sporulation protein D	P-SigH	3.5544419954	292	AAATTTAAACTATATACTATCGGGGTGAGAATTTGAAAAAAAATTATAAAATACATAATCTAAATGAATATAAAAATAAAAAAAAGAATAATTATAAAAA
CD630_26570	-1	3067057	4		Conserved hypothetical protein	P-SigH ?	1.84942860509	38	GTTGTGTATAGAAAAAAATACAATTAGATTGTGTAATAGTGTATTAATTTAGCGATGAAATTTTAGAGGAAGAAATATGATTAATAACAAATATAGTATA	CD2657-CD2656
CD630_26630	-1	3076733	2		Putative signaling protein	P-SigA ?	1.09150052222	392	CAATAATAAAAGATATACTTGAAGGAATTGACAAGAAAAAAGAAAATTACCATGTTGTTGTTGATAGAGAACAAGCTATAGCAGAAGCTATAAGTATGGC
CD630_26640	-1	3078113	4.3	murE	UDP-N-acetylmuramyl-tripeptide synthetase	P-SigA/ P-SigK	3.05/. 2.310	47	TTTCCTCAGTTATATTATAGAAAATTATAGAGCATTTTTTGCAATGTTTCAAGCATTTTTAACCATTCACATAGTAAAAAATTCTTAATATAATATTATA
CD630_26650	1	3078197	4		Transcriptional regulator. AraC family	P-SigA	3.05148666279	33	TAAAATTACACTACATATAATATTATATTAAGAATTTTTTACTATGTGAATGGTTAAAAATGCTTGAAACATTGCAAAAAATGCTCTATAATTTTCTATA
CD630_26680	-1	3082679	6.32		Transcription antiterminator. LicT family	P-SigA	3.96554718989	150	TAAAATTTGATTTTTGATGTTAAAATTAATACTAAAAAATAGGAAATAGTTTTCAATAATTTACTTGACATATATATTTATTTATAATAGAATAAAACCA
CD630_26710	-1	3086974	4		ABC-type transport system. oligopeptide	P-SigA	3.14430900199	41	ATATAGAAATTAACTATTATATTATTATAATTAATAGAAAAAAATAATAAAATGTAAGAAAATGTTGTAATTTAAATTTTTATAAAATACAATCAAAAGG
CD630_26750	-1	3091758	1.36		Transcriptional regulator. LysR family	P-SigD*	3.17124670708	49	ATAAGAAAAATTTATAGGATAAAAATTTATAGTAGATTTAGAAAAATATTTTGTTAAAATATTAATGAAATTATGTTGATTTTCCTATAAAATATCATTA	CD2671-CD2670
CD630_26800	1	3095191	2.63		Putative permease			339	CCTCAATCAATGGTGTAATAGGATTTGCTGGAAAGGCTGCTTATAACTCAGCAAAACATGGACTTATTGGACTAACAAAAGTTGCTGCTCTTGAAGCTGC
CD630_26800	1	3095365	1.66		Putative permease			165	ACCTTTCAAAAACTCGTAATATACCATTGGAAAATGTCTTAGAGGAAGTTTTATACCCACTTGTACCACAAAAACGCCTATTAGATGTTCAAGAAATTGC
CD630_26811	-1	3098992	2.59		Conserved hypothetical protein			550	ACGTATATGTAGCTCAAGTTGCTATGGGTGCTGATAAAAACCAATTTATCAAAGCCGTTTTAGAAGCTGAAAAACATGATGGGCCATCTTTAATAATAGC
CD630_26820	-1	3102347	3.14	pfo	Pyruvate-ferredoxin oxidoreductase	P-SigH*	5.13938460129	123	AAAACTTAACATATTTAATTTTAAAAAAAATCTACTTAAATATGTAATTAATTTACAATTTTCAAAGGAATTTTATCTAATCTGTAGTATTATATTAGAA
CD630_26830	-1	3103346	2.1		Putative propanediol utilization protein	P-SigA	2.83069246105	35	GATAATCAAGAATTTAAAGATATAATATATAAAAATTTAAAGATATATATTGATTCAATATAATTTGATTTTGTAGGTAATATTATGTATAATTGTATTG
CD630_26860	-1	3106296	5.07		Putative membrane protein	P-SigF	3.94946267721	24	GCTTCAATAACTTATTTACAATAAATACTAAGTCATAAAATATTTGTTATTTTTTATTATTACCAAGTATAAAAAATATTATAATTGTAAAACTTACAAA
CD630_26871	-1	3107211	16.86		Putative spore associated protein	P-SigF	2.10538734557	32	TAGAAAGTAATTTCTAAATTGAGATAGCTTTTTTTTATTAAATTATTAAATAGATATATTTTTATGTAATAAATTTTATGTATTTGGATAAAATAATACA
CD630_26880	-1	3107629	1.68	sspA	Small. acid-soluble spore protein alpha	P-SigG	2.85012840813	40	GATTCAATTTGCAAATAGCTTTTTCTACTGGATATTTGGCAGGTTTTAATTGCTAAAAATTACCTGAATTAAAAATGTTTAAAATCACATAATATTATCA
CD630_26910	-1	3110539	4.89	hpt	Hypoxanthine phosphoribosyltransferase	TGN-10	3.59748170369	30	TTAATGGAAAAAGCAAAAAAGTATGGATAAGCTGTTAATTTAGGTTTAAAAATGATGAAAAAGATTTTAATTGATATTTTGGTATGCTATAATATATAAG
CD630_26930	-1	3113182	8.46		Sodium:dicarboxylate symporter family protein	P-SigA	3.34479644104	74	TGAAGAAGAATAACAATTTATATATGTTATTCTTTTTTTTATTAACAAAAAATGGTTAAATTGTTGACGGAGAGGTAAAACTCTATTATCATAATAAGTG
CD630_26940	-1	3115126	5.5	asnA	Aspartate-ammonia ligase	P-SigA	3.79107924956	363	TTTGAAAATTTATAAAGTATAGGTAAAAATTTATAAAGTGTTTAAAAATAAAAAAATAATAAACTTGACAAATTTTAACTAATCACTTATCATACTATTA
CD630_26960	-1	3116475	1.19		Putative pyridoxal phosphate-dependent transferase	P-SigA	2.92448040192	74	TAATGAAACTGATTTTGGAATATTGAAAAAATATGATGGGAAAGTAATTATATTTTAAATCTATTGGACAAAAAAGTGATATTATTATAATATTAAGAAT
CD630_26990	-1	3119058	6.55		Putative membrane protein	P-SigL	6.0120950621	39	TATAAGCTATTTAATCACTGGAATAAATTTACAATAAAAAAATAAATACAAAGGCTTTATCATTAAGGTATTGGCATAAGTTTTGCTTATTAAACAAGTA	CD2699-CD2697
CD630_27020	-1	3124370	4	brnQ	Branched-chain amino acid transport system II carrier protein	P-SigA	3.4116416693	35	AAATGAAAAAAATATTCATAAAATAAATTGGGAAAACGTTAACAATGTGTGAATTTTTACCAGATTGACATTTTTCTGAAAATAAAGTAAGATTATCTTA
CD630_27060	-1	3130579	4		Conserved hypothetical protein	box-10?	1.52488933218	27	ACATAATTAATAATAAGGATATTACTAGAATTTCAATTTCTAGTAATATTTTTTTGCGTATAAATGTAAACTTGACGAAATAAGTAGTATAATCAATATA
CD630_27090	-1	3135105	4		Putative oxidoreductase	box-10?	1.57265954177	36	TTTAATGCAACTAAAAAAGTTTTGGATAAAGCATGGTCTGAAGTATCTCCAAAATAAACTTATATAATATAAAAATATACAGAGTATTATAATATAAAAC	CD2709-CD2708
CD630_27120	-1	3138414	4		Conserved hypothetical protein	P-SigB	3.07262297635	77	AAAATATATATTGAAAAATAATTATAATTGAGATGTGAAATTCAATCAATAAAAGCTTGATTGTTTTACATCTCAATTTTTTAGTATAAAATTAAGTTTA
CD630_27130	-1	3140485	3.77	ldtcd2	L.D-transpeptidase	TGN-10	3.54594904259	35	ATCCTAATGGGTATGAAGAATAGAATATATACTTATATGTATAAATGTAACAAATTTGTAAATATAAGGTATTGGTAATTTTATGTTATAATTAGACACA
CD630_27170	-1	3147779	4		Putative sporulation protein	TGN-10	3.45807573091	146	TGTTTTTTTATTTGTAAATTTGTCTAATCTACTTTTAAAATTTTGAGGAATATTGTAATATAAGTTAGTACAGATATTAAAAATGGTATAATATAAGATA
CD630_27170	-1	3147993	2.66		Putative sporulation protein	P-SigH*	2.117	360	GAGCTCACCAGCAGCTAGGCGACTAGTTGGCTATGTAAACCCCACCTGGAGCAAGACCAAGATAGGAATAAAGAGTGCTGCTCGTACTCTCCGGTAGGTA
CD630_27200	-1	3157156	2.23		Putative transporter	P-SigK	3.34733069727	26	CTATGAAGCAGGAAGCATGTGACTTTAGTTATGGGATGTTCAATATTGTGTACCTCTAGGCAAGTAACAAGTTTACTTACAAGACCATATAATATTATTA
CD630_27220	-1	3159427	1.79		Putative membrane protein	P-SigA	2.99102947963	49	TGTGTGTATATTTTAATTAAGCTTTAAACATGTTTACAGGAGTAGAAACTATTAAAACGTGTGACATTGCTAAGCTTTTGCTAATAAAGTATAATATTTT	CD2722-CD2721
CD630_27240	-1	3160980	1.8		Putative polysaccharide deacetylase			-346	AAATTATAAAAAGAATGTTGAGAGAAAATCATATAGTTGGTTTACATTCATTGGAACACAGAAATGCATGGCTTTATAGTTATAGTTATGTTAAAAAAGA
CD630_27250	-1	3162459	6.1		Putative monogalactosyl-diacylglycerol synthase	P-SigF*/ P-SigB	2.935/ 2.040	45	ATTTTTAGATGGTCTCTTTGTATTTTTTAATTAAAACTTTAAGATTTCTTAAGAATTATACTAGGTTTTTCTAAAGATTTAAAGTCTATACTTATAAGTA	CD2525-CD2523
CD630_27260	-1	3164057	2.12	glyA	Serine hydroxy-methyltransferase	P-SigA	4.19911501358	76	TTATTATATTTTAACTTAAAAATAAAGAAAGTAACTATGTTAAATATGGAAAAATGGCAAAACACTTGACTATTAATTGGTAAAGGACTATAATAATAAA
CD630_27270	1	3164197	3.04		Putative membrane protein	P-SigA	1.99960385105	112	TGCCATTTTTCCATATTTAACATAGTTACTTTCTTTATTTTTAAGTTAAAATATAATAAATAATATTGTCTAATTCTTTTAATTGGATATAATTTAAATG	CD2727-CD2728
CD630_27270	1	3164209	3.85		Putative membrane protein		4.08230989752	100	ATATTTAACATAGTTACTTTCTTTATTTTTAAGTTAAAATATAATAAATAATATTGTCTAATTCTTTTAATTGGATATAATTTAAATGTGACTATTTTGA
CD630_27290	-1	3166208	1.53		Putative regulator of the SigE factor	P-SigK*	2.21204329091	107	CAAGAACGTTATTGTGTTGATATATTGGTTCAAATATCTGCTATAAGGTCTGCTATAAATAGAGTAGGCACAATTATCTTAGAGAATCATATAAAAGGAT
CD630_27310	-1	3166909	4		Putative membrane protein	TGN-10	3.98876443395	56	TATTATAAATTTATTATAGACTACACATTGAAGTAAAAGAAGTAGCTAAAATTATTCCTTTTATTTTTGTTTTTTGTATCTATTTGGTATAATAGTATTA	CD2731-CD2730
CD630_27350	-1	3173883	2.05	cwp14	Putative cell wall-binding protein	TGN-10	2.9336664247	43	GCAAAGTATTAATGTCAAGTAAGAATAAAAGCTTATTAGATAAGAAAAATAATATTTTATAATAATGATGTTACTTAAATTATTATGTTATACTATTTTA
CD630_27360	1	3174151	4		Transcriptional regulator. LysR family	P-SigA ?	1.33103653964	61	TTTTTTTAATTAGATTATGTACAAAATATAAATAACAATTTAAATAACTTTTTAATATATTGTAGTTTATTATATAAACTTTATATTATAATGTATAATG
CD630_27380	-1	3177325	1.81		Putative cytosine permease	P-SigH	2.32988598161	80	AATAAATTTGGACTATTTATCTATTTATAACTTAAATTATATCAAATTGATAACAAACTAGATATTATACTTTTTTGTAGAATAGAATTACAATTATATA	CD2738-CD2737
CD630_27430	-1	3183551	3.07	dtd	D-tyrosyl-tRNA(Tyr) deacylase	P-SigA?	1.28465178213	9	AATGACACAGAGGAATTAAAAATTCTAATGAAAAAATTAAAAGCAATTCCTGGTGTAGAAAGTATTTATAGAATGACAAATTAGAGTTAAAATAATAGGG	CD2643-CD2642
CD630_27440	-1	3186083	2.03	relA	GTP pyrophosphokinase (RelA/SpoT)			309	TTTTGATGGGTACACCTGTAGCATATGCTTTAGGAGTAGGATTTGTTCCAATTAGAAAACCTGGAAAGTTACCAGGTGAAGTTGAGAGTTATGAGTATGG
CD630_27460	-1	3188053	11.05	recJ	Single-stranded-DNA-specific exonuclease	P-SigF*	4.111	-770	ACTAGCAACTATTTGTGATATTGTTCCACTTATAGATGAAAATAGAATAATTGTAAAAAATGGTTTAAAATCAATGAAAGAAGGCAAAAATATTGGATTA
CD630_27470	-1	3190603	4		Putative ubiquinone biosynthesis protein	TGN-10	2.37110021897	103	AGTATTTGATTAAACCAGATATAAAATGTCAAAAATAAAAATTAACTGAGTTAAATAATTTTAATAAAATTGGTAGTATATGTGATAAAATTAAATATTA
CD630_27480	-1	3191944	4.94		Putative acyltransferase	P-SigA	1.61230101062	649	ATGAGACCAACTTTAAATGATAAAGGAAGTTATGATATTACATTACCACGATTTAAGAAACTTGTGGAAAAAAGATCAAAAGATAAGTATTATTATATAA
CD630_27490	-1	3192909	1.98		Putative radical SAM-family protein			206	AATACAAGCACTTATTTATACAAAATTATCAGGAAAAAAGAAATTATTATATTTTAATAAGATTAAAACAATATAAAATCAGATACAAAATTTATTTTAT	CD2749-CD2748
CD630_27510	-1	3195621	4		Conserved hypothetical protein	P-SigA	3.18842273491	61	AACTTTATTACCCCACATATATAAGATAAAATTATTAATATAAAATATAATCTATCGACAATGAATAGACTTTTAAATAAACTTAATATAAAATTAATTA
CD630_27520	1	3195847	2.17		Conserved hypothetical protein	TGN-10	2.35983144223	57	TATACACTATTTATATTTATTACTCATTTATAGTGATTTTTTTCAAATTTTTTCTTATTTACTATATCATATTTATTCAATTTATGATATTATTTAAATA
CD630_27530	-1	3200138	1.8		Putative signaling protein			361	TATAATCGTGTTGAAATGGAGGAAAATGATAAATTATCTGTAATTTCATTTGTTGATTTAGATGATTTGAAATGTATTAACGACTTATATGGACATGAAA
CD630_27540	-1	3201867	1.92		Putative diguanylate kinase signaling protein	P-SigH *	2.30591198334	514	CAATTTAATCCAGCTGTTTTAAGACTTATAAAGACTGTTATAGACAATGCACATAAAGAAGGAAAATGGGCAGGTATGTGTGGAGAATCTGCTGGAGACC	CD2754-CD2753
CD630_27560	-1	3204139	2.83	ptsH	PTS system. HPr protein	P-SigA?	1.48190169386	137	TATTGACAAATTGTATTATAAAAGACATAAAAAATCAAAGTTAAATAAAAAACAAAAAAAAATTTGTAATTATACTCGAAAAAAGTGTATATTAGTAGTA
CD630_27600	-1	3209405	2.67		Putative signaling protein	P-SigA	2.60704872625	46	AAAATTTTAAAAAATAAATTTAGTATAATGTAATGTAGTTATTTATATGTGATTTTAACTTGCATTGATTTGCTATCAATTGTGCTTTATAATTAGTATA
CD630_27600	-1	3210052	18.65		Putative signaling protein			693	CCTAAATCTACAAATTGCAAAAAAATTAGCAAATAAATTATCTAAACAAAAGGATATTCAAGTAGTAGTATCCAGAACTGATGATACATATATATCATTA
CD630_27610	-1	3210544	4		Putative N-acetylmuramoyl-L-alanine amidase	TGN-10	3.32511909944	-35	AGATGTCACTTTAGGTGGATAATTAAAAATATTCTGATTTAAGGTTGTAGAGTGTTTTAAATTATTGAAAAAAAAACTTCTTGATGGTAAAATAACACTA
CD630_27620	-1	3211281	51	uppS	Putative undecaprenyl pyrophosphate synthetase	P-SigG	2.553	15	TCTGTCTTAAATTAGTTTACTACATAATTATATAAAAATAAATGTATTTAATGTTACAGTTTTGATTAATAATGTAATATTTTGATAATAATACCTATTG
CD630_27670	-1	3217716	5.85	cwp19	Putative cell surface protein	P-SigA	4.02143909454	47	TAATAAATTATTTCATATTATAATCAAATATCAAATATAAATTTTAACTATATTATTCAATATTTGACAGATAATATGAATTTTAGATATACTTAATAAG
CD630_27680	-1	3218738	16.68		Putative cell-wall hydrolase	P-SigA	2.81911894242	60	ACAAATATATACTAAAAAGAAACAAAAGATTACAAAAAGATTACAAAAAGATTACAAAAAAGGTTGCAATTTATTTTGATGTAAGATAGAATGTTAATTA
CD630_27690	-1	3221009	4		Putative polysaccharide biosynthesis protein	TGN-10	4.24887067826	219	AAATGTAGGAGGACATCCAGAATCTGTATGGGAAAATGAAACTGGCTTAATTGTAGAACCAAAACAACCAGAAGAAATAAAAAATGCTATAATAAAACTA
CD630_27710	-1	3223853	2.31	rkpK	UDP-glucose 6-dehydrogenase	P-SigA	3.02181933207	587	TAAAAATTGGCAGCTTTTATTAGTGGATGATTGTTCTAAGGACAATTCAAGTGAAATTATAAAAAGTTTTCGAAAAGAAGATGCTAGAATAAAATATATA
CD630_27800	-1	3230042	3.16		Putative glycosyl transferase	TGN-10	3.22373465896	315	TATAAGTAAATACTTAGGAACAAAAGAAGAAATGGAAAAAATAAAAGAAATATACCCAACTATACAATCAATCTCTATAGATTATGGTATTATGGAAAGA
CD630_27810	-1	3234451	9.59	mviN	Transmembrane virulence factor. MviN family protein	P-SigF	3.18925751837	309	TATACTGCTAGATTAGACTTTGGTAGTAGATCTGATGTAAACGAATATATTTCTTTGGGAGTAGTATCAGCAAAAGAAAATATGCCAATACTGATTTGTA	CD2781-CD2770?
CD630_27820	-1	3235879	3.42	cwp7	Cell wall binding protein			567	TCGACTTGTACCAAAGAATTATGGATTTAGTTTTATCTATAATAGGACTTGTGATAGGTTTACCTTTAATAGCAATATTTGGAATTCTTATTAAAATAGA
CD630_27830	-1	3236168	2.24		Putative glycosyl transferase	P-SigA	2.79956171373	75	AAAATATAACAAGAGATGATATATTTTTGTAAAGAATCAAATTGTTTACAATGATGTTTCTTGTATTGATAATCTGCTCATTATTGAGTATAATATAGAA
CD630_27870	-1	3244429	4	cwp84	Cell surface protein	P-SigA ?	1.36272616259	100	TAAATATACTTAAAGATACTAACAAACATTAGTATAGCACATCTATTAATAAATCAATATATCTTAAAATATTATAAAAATAAAACTATAATATTCTATA
CD630_27910	-1	3249602	2.53	cwp2	Cell wall binding protein	P-SigA	3.15151016599	48	TAAAAAAATAAAATATAAGAAAAAGTTTATATCTTTTGGTTAATTATTACAATAAGTCTCATTTATTGAAATAATATCAAATATATATTATAATTGGTAA
CD630_27920	-1	3252664	2.76	secA2	Protein translocase secA 2			350	AGATGCCTTAGCAGCAGCACCAATAGCAGGTAGATTTAAGGAGTCTCCAGCTCCAATCATACTAGCTACTGATACTTTATCTTCTGACCAAAATGTAGCT
CD630_27930	-1	3254806	5.34	slpA	Precursor of the S-layer proteins	P-SigA	2.79460624097	88	ATTTTAAAATTTAGGGTATAAAAACTTGTAAACTTGGAGAAAATAATAATTTAAAAAAATAGCTTGCAAAAAGAATAAAAATGGATTATTATAGAGATGT
CD630_27950	-1	3258879	2.15	cwp11	Cell wall binding protein			544	AACTAGACAAGAGACGAATGCCAAAGTAATAGATAAATTCTACTCTCAATCTAAGCTAGATGGAGTTGTAGTTGCAAATCAAGACAAACTTATAGACGCT
CD630_27950	-1	3258945	1.78	cwp11	Cell wall binding protein	TGN-10 ?	1.7465115668	610	CAAGGCTATTGAACAAGTTGGAAAAATAGCAAACAAAGATATATCAAACAATAGGGTGGCAGGTCAAACTAGACAAGAGACGAATGCCAAAGTAATAGAT
CD630_27970	-1	3267563	2.28		Putative calcium-binding adhesion protein	P-SigB	2.23964889656	808	TTATCAAGCAATGTATAAATCAAGCTTCACCAAATCAACAAGGTTTATATTACAATCCAAATGATAGAGCATTTAAAGAGAGAATAAAGGGTAAAGTATA
CD630_27991	-1	3271691	3.66		Conserved hypothetical protein	TGN-10	2.92591472423	28	AGTTATTGCTAATATCAGCAGCAGGAGGCATTGGAGGCGTATTGGGTGTCAACTTTAAATAGAGTTTATATTAAAGTAGTTTTATGATATAATCAATAGG
CD630_28000	-1	3272107	3.07		Putative membrane protein	P-SigE	1.29739338649	16	TGAAAAATGGGCTATAGGAACTGTTAAATCTAAAAAAGAAGAAATAGAAGAAGACTAAATTAGTAATTTAAAAGCCTTTTCTCGAATATATATTAATTTG
CD630_28010	-1	3272530	1.09		Conserved hypothetical protein	P-SigA	1.97936811344	88	AGATTACTTGATTTTAGAAATGAATTTTTTGCAAAATATGGATATGAAATATAGGTTTTGCACTATTAATTATAATCATTTTAATATATAATATTCAATA
CD630_28010	-1	3273121	2.65		Conserved hypothetical protein	TGN-10	3.94647468948	679	GTAAAAAATTCTTTAGAAAGAACAACAAGATGGTTAAAAAGATGTAAAGATGCTCATAATAATACCGACAAGCAAGCTTTATTTGGTATAATACAAGGTG
CD630_28030	-1	3274319	2.39		Putative membrane protein	P-SigA	1.77603948972	58	TTACTAATTTTCACTTACCAGAGTCTACACTAATAATGTTAGTAAGTGCTATTTGTGGAAAGGATAATGTTTTAAATGCATATAATGAGGCAGTAAAAGA
CD630_28070	-1	3277911	4	ruvC	Crossover junction endodeoxyribonuclease RuvC	TGN-10	3.10324232469	65	GAGGTAAAATCTTGCTTTGATATAACTTTTTTATTTGATTTTATATTTTACATAGAGCATTTTATGATTTGTTAATATTATTTATGATATAATGATTTAG	CD2607-CD2606
CD630_28080	-1	3278805	16.99		Conserved hypothetical protein	P-SigF/ P-SigG	3.494/ 3.281	18	AGAAAATATCTATTCTTAGAGTAATTTGAAATATAAATATATTTTCTTCTAAAATTTACCTAAATTGTATAAAAACTTACAGCTTGGAGAAAATAATAGA
CD630_28090	1	3278964	41.82		Conserved hypothetical protein. DUF1540 family	P-SigF/ P-SigG	2.881/ 1.147	26	ATATTTATATTTCAAATTACTCTAAGAATAGATATTTTCTAAAAGGTAGTTTTCTCTTAATGGTTATATTCTTGTAATTATATGGACATAATTTATAATA
CD630_28150	1	3285698	6.51		Conserved hypothetical protein	P-SigA	2.60362102044	95	GTAACAATAAGTTATTTTAGTATTATACTTTCATTTATTAAAAATATATCTATCTCAAATTAATTTCCTAATTTATAAAAAATATTCTATAATTATATTG
CD630_28160	1	3286453	4		Conserved hypothetical protein	P-SigA/ P-SigE ?	1.590/ 0.441	78	TTAACCTAAAGATAATTTACTTTTAATCTATATGAATTATCATATAAATAATCAGAAAGTTATCTTTATAAATTATAGTTTTAGATTTATAATTTATAAA
CD630_28260	-1	3299716	2.72		Putative aldolase	P-SigA ?	1.22671632853	301	AACTTGCAAAAAAACTTTAAACTTTATTGTGAAAAATGTTTAAAACCATATAAACTTACGAATGGTCTATATTTCTATTTAATTTATATTAATAAAAATA	CD2827-CD2826
CD630_28280	1	3300135	2.34		Putative PLP-dependent transferase	TGN-10 ?	2.00386076795	25	CACTGTACATAAATATATTTTATATAAAAGTTTATATTTTCAAACAAGTAATTTTTCGAAAATTGTCTAAATTCAGTAAAAATATGGTAATATATACATA
CD630_28300	-1	3303464	3.06		Conserved hypothetical protein	P-SigA	3.39475103535	189	TATTTTTTTTTGAAGATTTATGTAAAAAAATAATAACTTTTTAGAAAAAAGTTCCAAAGGGATATAGACAATTAAAAAGATATAAGCTATAATATAGATA
CD630_28330	-1	3311499	8.19		Putative calcium-transporting ATPase	P-SigE	3.20837607889	28	AAAATTTAATAATATATAACCACTATAAGGTGTTGATTAATCAACACCTTATTTTTTTTGAAAAGTAATATACAAGCTATCATAAGCATATAATTCCTTA
CD630_28390	-1	3319771	4		Two-component sensor histidine kinase	P-SigB	2.87973257338	88	AAAAAATAGTTAATATAAAAGTGATACAATAATAATAGAAGTAATAAAAAAAAATAATTAATATAAAAATGTGTACAAACTAATGAATATTGATATAGTA
CD630_28410	-1	3323998	3.84		Putative amidohydrolase	P-SigF/ P-SigG	4.080/ 3.342	117	TTAAATTTAACAACTTATAATATTTTTTCAATTAGTATAAATCCTATTAATTTGTCTTATTTACAATGAATAGTATTTACTTCTTGGCAAACAATAATTA
CD630_28420	1	3324160	5.48		Nitrilase (carbon-nitrogen hydrolase)	P-SigA	1.62954194833	107	TACTAATTGAAAAAATATTATAAGTTGTTAAATTTAAATATCTAAACTCAATTATATCTGTACAATTGTAATTTTTTAAATCATGATGTATTATTTTAAA
CD630_28450	1	3326890	4.62	rbr	Rubrerythrin	P-SigG	3.11095784144	48	AAAAACAAGAATTTCTTAGAATTTTAAAAAAAATTAATGATAATTTTAAAAATGCTGACTAAATTGAGCATAATTATATCTCCTATTGGAATAATAAATA
CD630_28480	-1	3330115	8.71		Conserved hypothetical protein	P-SigA	3.16437408578	33	ATTATTTTTATGCCTATTTATAGAAAATAAATGATAGTTGCTTTATTAAGTATTATTATCATACTTGACAACGTAACAATGTTTTGTTATATTAGGTTTA
CD630_28490	-1	3332404	4	phnXW	Bifunctional phosphonoacetaldehyde hydrolase/aminoethylphosphonate transaminase	box-10?	1.53511924476	53	AAAATAAAAACAACTAAATACAACTAAAAACAGAAATTTAATATATATTTAACCTAAATATGATGTATAATTAACATATGAAAGTTATACTTTAAAAGTA
CD630_28530	-1	3336800	2.84	dltA	D-alanine-poly(phosphoribitol) ligase subunit 1			257	TTGTTGTATTAATCCCAAGTATGGATAAATTCTATAATTTGACTGGTATTTCTGAAAAAGAAAGAAATCAGTACTACGATAAAGCACAAAAAATAGCAGA
CD630_28540	-1	3337889	2.63	dltD	D-alanine transferase DltD	P-SigA	2.38209859098	35	TTTTTTTTACAATTTTGTAACAGTATCAAAAAAAGTTTTGACGATTTTATTACAATTTTGTAGTTGAATATACATATCAAAACTAATATGATTAATAATA	CD2854-CD2851
CD630_28550	-1	3339212	2		Putative NAD(P)-binding oxidoreductase	P-SigA?	1.27649842516	51	ATTGTAGTTAAAAGAAAGCTATGTTAAAATGGTGAAATCATTTAAAATTAGCTTTCTTTTTTATTTGATAAAATTATTTTATAATATATCTATAAGTTGT
CD630_28560	-1	3339897	2.2		Putative membrane protein	P-SigG*/ P-SigF	3.17/ 2.75	21	AAGAATGTCACAATCTATAATATAAAGTATTAATTAAATAAATTAAATATAATTTCTTTGATTTAGAATAAATCCATGAATATGAGAAAAAATAAGTATA
CD630_28570	-1	3340681	5.02		Putative hydrolase. HAD superfamily. IA subfamily	P-SigA	1.89151075633	24	TAAACCAAAGTGTAACTTTTGAAAATTACAATTTTACAATATTAGAATTGGATAAATTGAGGGTTGTAAAATTAATCATAAAAAGTGTAATATAATTATA
CD630_28580	-1	3342049	4.45		Putative membrane protein	TGN-10	2.26391395459	74	AAATAGCCAGTCATAAATATTAAAAGGGGTTATTTAGTTTATAAAAATTATTTGTAATAAAGTAGGATATATTAATAAATATGATAGAATATATATTATA
CD630_28620	-1	3346808	2.5		Putative peptidase. M19 family	P-SigL*	6.21889367687	32	GTAGTAAATATCAACCTTACTACTGTTTTTATTTTTTGCAAGATTTATTATACAATTAAAAATTATATTTTGGCACATCAATTGCTACATAGGAAAAATA	CD2862-CD2859?
CD630_28640	-1	3350321	9.81		Putative hydrolase	P-SigE	2.64204601914	19	TATTTGAAAAGGCAATAGAGAAGTATTGTAAATAAATTTGAAAATTTAGTTATTCATCATTTTATTCATATATATAAAATAACCATCATACATTTTCTTG
CD630_28650	-1	3350950	3.51		Putative bacterioferritin	P-SigE	2.71059594535	31	ATAAAAGGTCATGTTAATTTTAATTAATATGGCTTTTTATTATTTAAGTAGATTTTATTATCTAAGTTATATGAAAAAGTTGTGATGCATACAATTAATA
CD630_28670	-1	3353890	4		Putative regulatory protease. U62 family			78	TTTAATTATCTAGTTATATGGGTATGTATAGATAAAATGTGATAACATTTTAGTATAAAACATATGTATAATATATTCATAATTACCTTATTTTAAGTAA	CD2867-CD2866
CD630_28730	1	3360248	4		Putative signaling protein	box-10?	1.11923060572	166	ATAAAAATTTTCTATACTGAAAAGGAACTGTATCAAAATTATTTTGAAAACAGTTCTTTTTTTAACCTCTTTTACTCAAAATATTATAAAATAAGATTTA
CD630_28790	1	3368280	15.05		Conserved hypothetical protein	TGN-10	3.04173312929	34	ATAGCTTAGATAAGGTTTTCTTATATTAAACAGTATTTTTTTTAAGAATTGGACACAAATACAATGACTTTTCAGTTAAACAATGATAAAATGCAATTTA
CD630_28840	-1	3373147	3.92	celA	PTS system. cellobiose-specific IIB component	P-SigA	3.27978485434	137	TGGATATACATTAACTTTGAATGCTGTTGTCGAATAAAATTTAAATAAAATGAAAAAGTTTTCTTGAAATGTATATACATTTGGTATATAATAATATCAA	CD2484-CD2480
CD630_28850	-1	3373986	4		Transcriptional regulator. GntR family			72	AGTATATTAAAAGGTACATTAATGATAAGTCTATTTATATCTTTATTAAAACTCGGAAAGTTGTACAAGATTTCTGAATAAAATTTAAATTATCTTAAAT
CD630_28860	-1	3375445	4		Putative drug/sodium antiporter. MATE family	P-SigA	1.73767638457	79	TATATTCATAAGTATTAATTTTATCATAGATAGGTAAAATACTGTATCTTAAACATAAGTATGATTGAGATGCAATCCTGAGATATGATAATATAAATTG
CD630_28920	-1	3382946	11.18		Putative phage protein	P-SigG*	2.47993090451	81	TAAACTTTAATGAAAAAAGTAACATGTTTATATAATCATAAAAATAAAAATATATAGAGCAGATGTATAAAAACTTAGTATATATGAGAAAATATTAATA
CD630_28920	-1	3382989	5.96		Putative phage protein			124	GATATCAAAATTGTTCAGAAAAGAGTATAGTATGAGAAAATATTAAACTTTAATGAAAAAAGTAACATGTTTATATAATCATAAAAATAAAAATATATAG	CD2892-CD2890
CD630_29070	-1	3397049	5.23		Putative phage lipoprotein	TGN-10	3.71588394794	358	GGAAAAAAGAAAAGAAAGAGAATAAATAATATAGATAAAGCACTTGGATATTGTATAGTTTCAAGTGCTTTGTCTGTTAAAAAATGGTATAATAGAGATA
CD630_29071	-1	3398599	5.41		Putative phage protein	TGN-10	3.32900957253	83	GCTGAAAGAGAGAGAAAGAGGGGACGAAGAAGATAGCAAAATAAAAAAATAAATATAGAATAGGTAAAATATGTAATAATTATATGTTATAATATTTTTA
CD630_29170	-1	3404740	4		Putative scaffold protein			89	ATTAATTGTATTGCTAATGTCAATGTAGGTATTCTTTGCAATAAATTAAAAGAAAAAAATGAAGCTAATATAGATAAAGTTTCTGATGAAATTCTAAAGA
CD630_29190	-1	3405285	10.68		Putative phage protein	P-SigA	3.04491381978	94	TGGCAAAGACTTATAAATGGTACATACGAAGATATTGATATTCTCTTATTAAAACATGAATACCTTGAAAGTATATTTGAGAAAAAGTATAATATAAGTA
CD630_29240	-1	3410333	28.98		Putative phage protein	P-SigH*	5.25063115814	16	CTCCTTTCAATAGAATATTAGCATAAAATTGTGGTGAATTCTGCTATTGTCGAACGATTGTTGAAGGATATTGTATAATAACATAGAATTTACTATACTA	CD2924-CD2919
CD630_29260	-1	3411892	3.69		phage protein			278	GATATATGACATAATTTTTTATAGTGTAAGTTATTTAAATTAATTATAAATAACAGTAATTTTATTATATAAAATGTACATATTGTGAATAATAATAATA
CD630_29280	-1	3414572	3.28		Conserved hypothetical protein	P-SigA	4.49594819452	29	AAACAATTAAAAAATTTTAAATGACCTTTTAAATATAAAAAATGCATATATTTGACTTTTAATATTGACACTTTAGCATAAAACGCCTACAATAAATATA	CD2928-CD2927
CD630_29370	-1	3420202	2.16		Putative phage protein	P-SigA	2.39521218102	312	TAATAGTTGAAGAACACACATATTATAGAGAATGTTCTTGTGGATTTAGTATATTGATTGATGATAGAAAGGATGAGATATAATGAACATCTTGGCTAGT
CD630_29610	-1	3439244	4		Conserved hypothetical protein	P-SigA	3.97816009031	236	AAAAAAAATAAAATAAAAATTTAAAATGTCGACATAACGTTAATTTTAAAACAAAATAACGCTATTGACAAACTATATCGCTTTAAATTATAATTATTGA	CD2961-CD2954
CD630_29660	-1	3447917	1.66	adhE	Aldehyde-alcohol dehydrogenase	TGN-10	4.06588132729	95	AGCCAGATATTATTAGTAGAAATGATGTTATATTAGATAAAAAATAAAATGTTAAAAAAATAACTTGAAAATAGGAAAAGTAAATGCTATAATGTTAATA
CD630_29680	-1	3450268	7.42	dpaA	Dipicolinate synthase subunit A	P-SigK	3.2744821391	16	TGAAAAGATAGATAGATTAGCATTATTAAAAATGTTATAAGTATAATATTTAGTAATTTTAGTGAACCAATGTATTGATAAAAACATATTGTATATAGTA	CD2968-CD2967
CD630_29710	-1	3453509	3.76	bioY	Biotin synthase	P-SigA	4.41181221253	73	AAAATATAAAGTAACAGTATAAAGTTTACTTATAAATTAAATGTAAACCTAAATACTTATAATAGTTGACAAAAAAACGTCTTTATTTTATACTAAAACA	CD2971-CD2969
CD630_29820	-1	3465578	1		Putative CRISPR-associated Cas6 family protein	P-SigF*	2.92100929999	247	GTATAGGAATTTATAAGGGAGAAGAAATTAATGTTGTTATAAAAATTAGTCATCCATTTTCAACAATTATAAAGGAGAAAGTTTGGGTTAATAATCAACA	CD2982-CD2975
CD630_29850	-1	3469336	4		ABC-type transport system. ATP-binding protein			68	ATACAGAATAATCATGGGTGTAGTACTTGCAGTATTAGCTTTTACTAACATAATTAGTGTATAGAAAAAATAGATTTATTATCTATAAAAATTAAACTAA	CD2985-CD2984
CD630_29870	-1	3471540	2		two component system	P-SigH*	3.19157192774	65	TTTTAGAAAAGATATGGGATGATATTGAGTTTGTAGAGGAAAATACTTTAAATGTAAATGTTAGCAGGATAAGGAAAAGATTTGAGGAATTAGGTATAGA
CD630_29890	-1	3472934	19.61	ssuA2	ABC-type transport system. sulfonate-family	P-SigH	4.51042971098	-516	AAGAAGGTGGCAGGCCCAAAAGGGACTATATTACATCAGGTATTGATTTCAGCACTTGATAAAGAAGGATTAAGTATGGATGATGTGGAATTTGTTAATA	CD2992-CD2989
CD630_29910	-1	3475456	3.17		ABC-type transport system. sulfonate-family permease			320	AAAGAAATAATTTGATAAATAATTTTGAAGTACCTATGATAGAACCAATATTAGTAAGGACTTGTAGGGTTTTATACGATAAATATATAAAAAGTAAAGA	CD2992-CD2989
CD630_29950	-1	3480046	4	nrdE	Ribonucleoside-diphosphate reductase subunit alpha			100	AAAATTTGTGTATATACTATATGTAGTATATAATAGATAAAGCACTGACTATATGTAGTGCTTTTGTTTTTGAAAAATACTTATTGCATTTCTATAATTA	CD2995-CD2994
CD630_29970	-1	3482874	1.73		ABC-type transport system. iron-family	P-SigA	2.07306040781	401	TTTGCAAATAGTGATAAATTAAAAGAATTTACTATGTGGTCTATGGGAAGTTTTTCTGGATTTACATGGGAAAAGGTAGAAATACTTATAATAGTTGGTA
CD630_30040	-1	3490026	3.92	kdgT2	2-keto-3-deoxygluconate permease 2	box -10		243	TTTTTATATGTAAATATCAAAATATTATGAACTTATATTTTATCTATTTTTTACACTGTATAAAAACTTTATAGTTTTGAATACTATATAATTTTAAATA	CD3004-Cd3001
CD630_30070	-1	3493730	1		Putative L.D-transpeptidases	P-SigE?	1.96314045528	105	TTTAATGTGGCTAGAGGTATAATTGAAGAGTATATTAAAGAATGTAATATCATAAATTTAAATAAATAGATAAATATAGGTGAGAATATATAAGTATATG
CD630_30090	-1	3496264	1.15		Pyridine nucleotide-disulphide oxidoreductase. class I	P-SigA	2.37427641707	31	AAATAAATAAAAGTATTTAAGTATAAGTTTATAAATCAATTTAAGGTTACAAAAAAGTGCCTAATTGTACCACCTAAATAATCTTGTTATAGTAAAAGTA
CD630_30160	-1	3505179	5.05		Regulator. PTS operon regulator	box -10		17	ATCATCTAAAATTAAAGTGTTCAATACATAAAAATTACCGTATTTAATCAGGAAATATTAGTAGTTTTTTAGAAAAACATTTTCCATTAAAATAAAGACA	CD3016-Cd3012
CD630_30170	1	3505291	1.7		Putative glucose uptake protein	P-SigA	1.32484369429	31	ATGGAAAATGTTTTTCTAAAAAACTACTAATATTTCCTGATTAAATACGGTAATTTTTATGTATTGAACACTTTAATTTTAGATGATAAATTAAAAGCTG
CD630_30190	-1	3507956	5.27		Putative transporter	TGN-10	2.95556181465	31	GATACTTTTGATAATAAAATTAAACTTAATAGATATTTTCTATATAAGAAAGATGGTCATAATATGTCAATTTGACCATCTTTTTGATATAATTAAAACA
CD630_30260	-1	3515685	4		Conserved hypothetical protein	P-SigA	3.17925964795	35	ATTTTTATATTTTGTAATTTCAAATTAATAAATAATTAGATTTGATAAACAAAAAATAAAAATGTTGATTATATTAATAAACTTTAATATAATATATTTA
CD630_30310	-1	3521096	4.41		Transcription antiterminator. PTS operon regulator	P-SigA	3.9333515033	33	TATTTTGTTATTGTAGTATTATAGGGTAAATTGCAAAATATATACGAAAGTAAAATTTTAAATATTGACATTAAATTAAATATACTATACTATGTAAGTG
CD630_30320	1	3521726	4		Putative pyridoxal phosphate-dependent transferase	P-SigF*	2.46230757074	223	TTAGTCATATTCATAATTATTTCTAATTAGTGTTTAACATTTTATGTAAAATTTATAAAAAAATGTATATAAATTAAAATAAGTGACTATACTAAAAATA	CD3031-CD3027
CD630_30330	-1	3523774	2.28	trxA	Thioredoxin	P-SigA	1.92460319497	27	TTATAAATCTATTTATCATAATATTAAACCTATTAAAAATAGGCGGTTACAAAAAAGTGCCTAATTGAACTGTTATATAGGGCGTAGTATATTAATATCA
CD630_30370	-1	3529691	9.9		Transcriptional regulator. CarD family	TGN-10	2.64172515639	72	AAATCTAAAAAATACATTAATCAATGGTTAATGTATTTTTTAATTTTAATAATATAAGTTTTACTTACATTTAAGTCTTAAAATGTGTTAAAATATAATA
CD630_30410	-1	3534574	1.27	pepI	Proline iminopeptidase	TGN-10	2.82130604281	111	TATGTATATACTATTATTAAAAAATAAAATTATATAGTTAATATAATTTTATAATTGGTTTAGTATAGAGATTTTTAACTTTTATGTTATACTATTTATA
CD630_30440	-1	3538789	4.67		Transcriptional regulator. RpiR family	TGN-10 ?	1.0613066086	259	ATAAAATATGTAAATGATGAAATACAAGGAGATAGAATAGAAATAGCAAAGTTTGCTACGATATGTTTAAAAGCAGTTATTGAAGGTGATAATACTGCTA
CD630_30450	-1	3539282	10.9		Putative ATPase. BadF/BadG/BcrA/BcrD type	TGN-10	2.34011079179	-185	CAAAGGAACTTGTCATTATAATCAAATAGGATTTGATAATCTAACGAAATTATTAATAACTGGGTTGGAAGAAGTTTGTAAAGATGCTAAGATAAATGTA	CD3045-CD3044
CD630_30450	-1	3539485	3.76		Putative ATPase. BadF/BadG/BcrA/BcrD type			18	AATTGTAAAATAAATAATAGTACTGATAACCTTTCAATATTAAAAAAACAGCATTGGAAGGTTATTTTTAGATATTAAGTATTGAAAGAATTATTAAAGA	CD3045-CD3044
CD630_30470	-1	3541766	4		Conserved hypothetical protein	P-SigB/ P-SigF*	2.696/ 2.560	98	ATTAGTATAAATTTCAAAGTATAACAGTTATGAAATAAGTAACGAAGATATTTTGTTGATTGTTTATAAAAAAAGAAAAGGTAAACTTTTCTTTTTTTAT
CD630_30530	-1	3547069	8.53		two component system			153	GATTATAAAACATAAGTATAAGGATAAAAGTATAGAGTTGACTAAAAACGAAATAAAAATTTTAACATTATTATTAAAAAATAAGAATAGGGTTGTATCA	Pint operon
CD630_30540	-1	3547634	5.82		two component system	TGN-10	2.50576319087	44	TTAATAAAGAGAAAGGAGATTCTTGTAATAAGAGTCTCCTTGTTGATTAACTAAATAATTTGGGTAATAAATTCATATAAAATATGTTATGATATTAATA	CD3054-CD3053
CD630_30610	-1	3555814	3.76		PTS system. alpha-glucoside-specific IIBC component	TGN-10	2.56072605521	47	TTGAACATAAAAATGTGCAAAAACTTATTTGACTGTGAATAAGCTCCGAATGTACCCTAAAGATTGTATATATTTATTAACCTGTTAAAATAATAGATAT	CD3061-CD3058
CD630_30660	1	3561784	3.18	xylR	Transcriptional regulator. Xylose repressor	box-10?		16	ATTAAACTAACTTATGAACTAATAATAAAATATTTAATTATCTTTGTCAATGCAAAATAACCTTTTATTTTTGTGTAAAAAGTATTACAATATTATTTTA
CD630_30720	-1	3569044	11.42		Conserved hypothetical protein	box-10?		22	ATTATAAAAGATTACTAATTGTATATTTCTATATAGAATATTGGAAATATAGAACAAATAAATAATATAATTATCAAAATATGTAGTATCATTAAAATTA
CD630_30730	1	3569161	1		Putative membrane protein	P-SigB/ P-SigA	1.696/ 1.39	27	ATATTTTGATAATTATATTATTTATTTGTTCTATATTTCCAATATTCTATATAGAAATATACAATTAGTAATCTTTTATAATCTATACTATGATAAATGT
CD630_30770	-1	3575159	1.85		Transcriptional regulator. RpiR family			301	TTAGGGTTTGGAACTATATTTTCAATATTATGTACTGGAACTACAATTTCAATTGTTAGTAAGATGATTTCTGTTAATAAAAAAAGGTATTACTCAAATA
CD630_30890	-1	3591084	3.98		PTS system. glucose-like IIBC component	P-SigA	3.99917828789	81	GCAATACACTTAAAAGGATTTATATGTTAAACTAAATGATAAAAATAAAATGAATAAAAAATATTGACAATTTGTTTAAACAAATATAATATTTAAAATA	CD3089-3088
CD630_30900	1	3591344	4	treR	Transcriptional regulator. GntR family	TGN-10	3.37717465282	50	TTGAAACAACCCACAAAATAATTCTATTTTGTCCTTTTTATGGTTGATATGATTCTATTTTCACTATACATGTCTAAACACATTTGATATAATTTGTTCA
CD630_30910	1	3592290	4	treA	Trehalose-6-phosphate hydrolase	P-SigA	3.67984466141	23	TACAATTATATGTTTATACAAATAATTATTTATTGTATATTTTAGCTTTAATATTAGTTTAATGCTTGACAATTTGTTTGAACATATTATAATTAACTTA
CD630_30920	-1	3595412	2.01		Putative amino acid permease	box-10?		17	TCCAGAAATGATGACTAGAGATTATGATAATATGAAAAAAATATTTATGGCAATAGTTAAAGAAGCATCTAAATAAAAAATACAAATATATTAAGTTGGC
CD630_30930	-1	3596215	3.67		gamma-glutamyl-gamma-aminobutyrate hydrolase	P-SigL*	4.20480276777	42	TTATTTATATTACTCGTATTCAAAAAAAGTATTTCTAAAATAAATTATAATGTTCAAATAAATAAAATCTTGGTATGCTACTTGCTCTTTAAGAGAAGTA
CD630_30960	-1	3601775	2.52	bglA	6-phospho-beta-glucosidase	box-10?		29	CATGTAAATAATAGTCAGGAATTGATAACTGTTTTAGCGTAAAAGAGAGTTCTATTAATTAAGAATTATATATATGTATTTTTATTTTAAAATAAAGTTA	CD3096-CD3095
CD630_31020	-1	3611463	4		Putative peptidase. M20 family. peptidase V related	box-10?	1.16927807198	167	AGATATAAGAAGATGTAGCTAAGGCTACATCTTTTTTTATGTATTTTTTGGAATAAACTTACATTAAAAAAGACGTAATAGATAAGTTAAAATATTAGTA
CD630_31020	-1	3611646	2.15		Putative peptidase. M20 family. peptidase V related	box -10	2.03576255009	350	GAGATAAGGTAAAAGCTAAAGATTTAATAATGGAAGTAGATTTAGATTTTATAACGTCAAATGATTTAAATATAATAACTCCTGTAGTTATAATGGATGA	CD3102-CD3101
CD630_31030	-1	3612258	4		PTS system. glucose-like IIA component	TGN-10	2.25615762808	206	TTTAGAAGTAGTAAGTTCTGGAAAGATAAATTTTGAAGTTATGAGCAAAGGTACTTCAAAAGGTATTGCAGTTAAAAAATTTTGTGATATATTAGGTATA
CD630_31120	-1	3624302	2.58		Putative peptidase. M20D family			1176	AAACCAGTTATAGGTTTTATGGGAGAGTTTGATGCATTACCTGGTTTAAATCAAAAAGTTTCAACAAAGCAAGAAGCATTTGAATTGGGTGCATATGGTC
CD630_31170	-1	3631225	2.32	bglG	Transcription antiterminator. PTS operon regulator	P-SigA		155	TATGATAGGTATATTTAGAAACAGAGCTTGTAGTTATAGAATAAAAAAATATCTAGGAAACCGTTGACAGATTTATATGGATAGTATAACATATAGAATA	CD3117-CD3115
CD630_31200	-1	3634181	4		Transcriptional regulator. AbrB family	box-10?	1.41738637446	72	CAGTTAGTAGATTTGTGCTTGTTTTTTTGTTTACGATAACTTAAGGAAATATGTTACCTGAATAATAAATTTATATAATAAAAGTATATAAATATATATA	CD3120-CD3119
CD630_31201	-1	3634424	3.76		Conserved hypothetical protein			29	TTGATATATTCTATTCAAATGTATGTAAAATTTAGTAGTTAAGAAAATTATAACACATTAGTAATTTTTATACTTATTGGTAAAGAATTTGATTACCATT
CD630_31210	1	3634484	4		Putative flavodoxin/nitric oxide synthase	TGN-10	3.19468323088	83	CTCATATACAAGTCCAGTTGATGTCTTGTTGCTAAATTTAATGGTAATCAAATTCTTTACCAATAAGTATAAAAATTACTAATGTGTTATAATTTTCTTA
CD630_31220	-1	3635927	1.73		Transcriptional regulator. ArsR family			80	TTAGTGGATATTTTTCAGATGTAGCAAATAATTCGCCAAAATTAAAAAAGCTTTTAGGTCTAAAACGTAGTAATCATGTTCTTACAACATTAGTAATTGG
CD630_31230	-1	3636670	1.46		Putative nitroreductase	TGN-10	3.68402773522	25	ATTCTATGAAAAATTTATTTAATAGAGAAATTAAAAATTTAATGGTAATCAAATTCTTTACCAATGAATATAAAAAATGTCTACGTGTTATAATAGTTTA	CD3123-CD3122
CD630_31300	-1	3647929	4	bglA	6-phospho-beta-glucosidase	box -10		183	ATAAATCCTTTTATATATATAAATATACAGCAATATATGAGAATAAGATAACAATAATGAGGATATAAAAATGTATTTGCTATATATATAATTATATACA	Cd3130-CD3127
CD630_31380	-1	3659657	15.2	bglG	Transcription antiterminator. PTS operon regulator	P-SigA	4.24340377987	135	AAAAAAGTAGAATGAGTGAATACTTATGACAATAATCTAGTAGAGATATACATGAAATTATATATTGACTAAGTACAGTTATTATTTTATAATGAAAATA
CD630_31450	-1	3668353	7.46		Putative serine-aspartate repeat-containing protein SdrF			-163	CAGTAGCATCATTTAATGCGTCAAATACTTTCGCAGATACTATAGAAGAAAGTACTAATGCAGGAAATGCAGAAGGAGATACTAATGCAGGAAATGCAGG
CD630_31450	-1	3668622	3		Putative serine-aspartate repeat-containing protein SdrF	P-SigA	3.46249918612	106	TGTAGTTATTTAGCAAATAATGAATACTTATAATATATAAGGTTGAAAAAAACAGTATATTCATTGACAAATATAAGTTTTAAGTATATATTAAAAATTA
CD630_31450	-1	3668687	4		Putative serine-aspartate repeat-containing protein SdrF			171	ATTAATTACCCCTTAGTATTATTATATAAAAAATTAAATAAATTTTATATAATTAAAATTTTTATTGTAGTTATTTAGCAAATAATGAATACTTATAATA
CD630_31470	-1	3672007	3.11		Putative DNA-methyltransferase	P-SigA	4.39851242859	25	TAAAAATATTAGAATTTATTAAAAGCTATTACAAGTATAAGAAATTTGAAATGATTATTCAAAAATTGACATGTGAAAAAAAATATGATATGCTGCAATA
CD630_31480	1	3672240	4		Hypothetical protein	box -10		54	ATAATCTATTCAAATAAATAACATAATATATTTTTTATTTATTTATCAATCTTTTTTTATATTATATACCATATATTATTTTTTAGTAATATAATTATAA	CD3148-CD3150
CD630_31640	-1	3698539	3.84	rnr	Ribonuclease R	box-10?		336	ATATAAATTTACTTTTATTATAAGTTTTATATTATAAAGTTGTATTTAAAAAATTAATTGAGTTATATAAATTTTACATGATTTGAGTATACTAATAGAA
CD630_31670	1	3699852	0.83		Putative phosphatidylethanolamine-binding regulatory protein	P-SigB	3.81898558993	44	TGGAAGATATTCTTAAGGAAAAAGGTGTTTTAAAGTAAATAGATACCCACAAAAAAGTAAGTAATTTACCATTATTTTCAACTGGTATATAATTAAATTA
CD630_31691	-1	3702979	6.76	secG	Protein-export membrane protein SecG	P-SigA	3.335767309	40	GAGAATATAGTAATATATTATAGTAACAATATATTTTTTTGTATGTTATTTATAGCATAATAGTCTTGAAATGGCTATATTATTGTGATACACTAAAGAG
CD630_31700	-1	3704900	3.27	eno	Enolase	P-SigA	2.35836253635	76	TATAAAAAATAAAATAAAAATAGGAACTTTTACAAATTTACCCATCAAATAAATTTGTACCTAATTTTCAAAAGCAACTTTATGTACTATAATATAGAAA
CD630_31740	-1	3710209	2.02	gapA	Glyceraldehyde-3-phosphate dehydrogenase	box -10?	1.04266072231	56	AAAGTAGAAGCCTTATTAGCTATATCAAATATGCATAAAAACATGGTTCTTGTAACAGATGAAGAAAGTGCTTATAAGATATTGTCATTATTATAAAAGT	CD3174-CD3171
CD630_31750	-1	3711304	14.67	cggR	Transcriptional regulator. SorC family	P-SigA	2.85373158791	69	TGATTTGAAAATGGTGGAGAAATATTTTATAAAATAAAAAAATAAAAAAGTTTTTGAAAAACTATTGAAATCTATACGCAAATCCTATAAAATAAAAATA
CD630_31760	-1	3713436	4	glnF	RNA polymerase sigma-54 factor	P-SigA	2.35124859596	57	AGTAACAAAAAAAAGAAATATTAAATAAAAAAATAGATGAAATTGTAAATAAAAAAAACCCTTTTGCATAAGGTATATTTTAAATGATAGAATATACATA
CD630_31820	-1	3723580	1.11		Putative D-aminoacylase	TGN-10	2.28723418627	29	GTCCTTCTAAGGAAAATCTTGCTCATACAATAGATGAGTATATAGAATTAGACCAATTATTCAAAGGTGCAGAAGGATATTATGGTATATTAAAATCAGT
CD630_31910	-1	3733992	1.3		Putative oxidoreductase	P-SigA	2.40937656354	78	TAATGGATTAATATTAAAGAACTGTATTTTTATAATATTTGTCTTAAAAATAAAAAAATCTATTGACTTGAAGTTAACTCCAAGTAGTAAAGTATAATTA	CD3191-CD3189
CD630_31970	1	3742254	3.47		transcriptional regulator. MerR family	P-SigG*	3.56546731376	395	GGTTATTCTATAGGTGGCTGGGGACTTACATTGAGTGCTAGAGATATGTTGCGATTTGGTTTTCTGTATTTAAATGATGGTATTTGGAATAATAAACGTA
CD630_32010	-1	3749084	2.37		ABC-type transport system. multidrug-family	TGN-10	3.72192535301	947	TGAAGACTCCACTTGGCATTATACGTGCGTATACAGAGGGGCTTATGGATGAAGTTGATGAAGAAAAAAAGAAAAATTATATGAATGTTATAATAGAAGA	CD3201-CD3199
CD630_32030	-1	3750384	3.72		two component system	P-SigA	2.81271554289	31	CAATTCCATTAAGAATAGTCTAAAAAATACTATCAAAATGCTATAAAAAATACTATAAAAAAATAGTTGAAAAATAAATAAATTAATATAAACTAAAATA	CD3202-CD3203
CD630_32040	-1	3751572	10.53		Putative membrane protein	P-SigA	2.90994812006	366	TAAAATTATATACTTTATAAATGTAAATATGACGAATAAAAATGATAAATATAATAATATATATATTTACATTAGGAGTTTTCTATACTATAATTATTTA
CD630_32080	-1	3755491	5.75		Transcriptional regulator. MarR family	P-SigA	3.87916496454	62	AAGTAAGAGTCTAATATATAAAATTTATAGTAACTTTATGGTTTAAATATAAACTTGCGTGCTATTGACAAAGTATAAAATTAGCAGTAAAATAATTGCA	CD3208-CD3207
CD630_32130	-1	3758811	4		Conserved hypothetical protein	TGN-10	3.06805638904	45	TAATGGTGTGTATTCATAAATAATTTATAATCTGTAGGAAAGAAATAGTTTCACTATAAGATTATGATAAAATACACAATACTATGATAAAATAGTACTA
CD630_32160	-1	3763471	10.32		ABC-type transport system. glycine betaine/carnitine/choline permease	P-SigB	2.12923281585	857	GCTTTTATGGAGAGTATAAAGAGTACCTGCAATGTTTGTGAAGGTAAAAAATTTAAAAAAGAAGTTTTAGAATATAGGTTTCAAGGGAAGAATATAATTG
CD630_32180	-1	3766719	4		Conserved hypothetical protein	P-SigA?	1.98932976433	123	CTGTAATGTTTGCAATGTTGCAGTTAGAAGGCTTTTTTATTTTATTATAGTTCGTGTCAAAGATTGTATGAAACAATAAAATATTGTAAAATAATTTGTA
CD630_32200	-1	3769039	3.98		Putative methyltransferase	TGN-10	3.43325543728	148	GAAGGGGTGATTTTTTTGAAAGAAAAAGTACAAAGAGAAAAGAAGATAACTAATGGCAAGAATACTAAAATATTGACAAATGATGATATAATGAAATATG
CD630_32201	-1	3769140	9.93		Small acid-soluble spore protein	P-SigF/ P-SigG	3.76/ 3.45	8	AAGATTAAAAAGCATAAATACCTAAATTTAAAAAAAGTGTATTAATAAATACCCCTTACATATTTGTATAAATTTATTTTAATTGACAAAAATACAAATA
CD630_32210	-1	3770498	4		Putative peptidase. M20D family	P-SigH	2.61079353373	126	AACATTTCTTCTCTTGCTAAAAATAAAATTTTCCAATAATAATTCCTCTGTTTTGATTTATGAAACAGGGGAATTATTATTAATGGTGAATTATTTAATA
CD630_32220	-1	3771824	4.21	sdaB	L-serine dehydratase	box -10	2.39085718675	53	TGCATATTAATTTAATAAAATATACCAAAATGGAAATAAAAAATAAATTTTATGAGAATTTAATAACTAATAATTAATATATTTAGGTTATAATAAATAT
CD630_32240	1	3773030	5.76	asd	Aspartate-semialdehyde dehydrogenase	P-SigA	2.03059088974	370	AATGTGTTAAAACAAGAATTGACAAATTTTGGATTTAAATTTTAGCAATATTTATATAAATAAGTTGATTTTTTCTTAAATATGTATTATTATTAGAATA
CD630_32270	1	3776368	4	dapH	2.3.4.5-tetrahydropyridine-2.6-dicarboxylate N-acetyltransferase	P-SigA	2.12728520355	77	AGATATAATAATACGCAATACAAATCAAACATATATAATAAATTTATTTAATACTATGTCTATACAATAAAAACTAAATAAAATAAAATATAAATAATAA
CD630_32280	-1	3778644	2.14		Putative membrane protein	TGN-10	2.22250913914	42	TAAATACATGTATGCATAAAGATGTATAAAAAATATATAAACATATAGTATTAATTTTAAATTCAACAATTTAATTGTTAAAAGTGTTATTATTAAATTA
CD630_32310	-1	3782770	3.03	hpt	Hypoxanthine phosphoribosyltransferase	P-SigA	2.76861158504	26	ATTGTTAATAATTGTTGAATGAACATAAAAACTCAATAATATTGACTAATATTGAATAAGAGTATTGAAAAAGTGAGCAATCTCTTATAAAATTAAGAAG
CD630_32320	-1	3784442	2.58	cdsB	Cysteine desulfidase	P-SigL	6.94375816028	87	ACATAAATAGAAGCAGTCATACCAATGGTTATAGAATATAAGACTAAAAATATAAAAAGATATAAAAAATATGGCATGTATTTTGCTATAAATATAGATA
CD630_32350	-1	3788231	3.85	ssb	Single-stranded DNA-binding protein	P-SigE	2.37994129497	52	TAAAAGTGAAATATTAAATGAAATTTATAACTAAATAAAAACTTTTGAACAGCAATCAAAGATTTGTAATAAAATACATCCCTTATAAATATATTTATTA
CD630_32460	-1	3801406	10.03		Putative surface protein	P-SigA	3.45697465317	356	ACTTCTAAAGATGTTTTTTAATGTATTTTGAGGGCAATATATATTGTAAAATAAATGGAAAAAATAGACAAAATATGCTAGATATTGTATAATAATAACA
CD630_32460	-1	3801140	4		Putative surface protein			658	TTATTAGATAAGTATCTAGGATACTAATTTATATTTTATTGAGTTGTTAAAAAAGTGCACTTAAAAAGTTAAAAAAGAAAAATTAAAAAACCTATTTATA
CD630_32480	-1	3804051	10.32		Polysaccharide deacetylase	P-SigE?	1.09368968508	33	AGAGTTTAATTAGGTCAATATAGGTTTTATTTTTTTAGTTATTGTCTTATAAATTAAATATTACAGTACTTTTTTGAGCTGAAAAAAAATAAATTTTAAA
CD630_32490	1	3804245	3.08	sspB	Small. acid-soluble spore protein beta	P-SigF/ P-SigG	3.39/ 3.09	64	ACTCTCTAAAATACTCATTTATTTAATTTTTTTATATTTTTTACATTTTTACCTTTATTTTTCTGTATATATTATTTTTATTTTGGAGAAATTAGTATTA
CD630_32500	1	3804671	6.69		Conserved hypothetical protein			32	ATATTTATTTATAAAATTGTTTTTATATGAATTATTAAAGATTAATAATACAATACAAATTGTTCTTTTAATTTTGTACAAATTAGTTTAATATATTATA
CD630_32510	-1	3806139	3.41		Putative dehydrogenase	P-SigE	2.0807890512	30	ATATTATTTCTTTTTTTAACATTAATAATAATACCAAATATATGCGTAATAATGCAACTATAAAGCATAATACAAGCTAATGAAATAATATATTATTGTA
CD630_32520	1	3806219	1.57		Conserved hypothetical protein	P-SigE*	3.20586776404	38	CTCTCTACAATACATATACTACAATAATATATTATTTCATTAGCTTGTATTATGCTTTATAGTTGCATTATTACGCATATATTTGGTATTATTATTAATG
CD630_32520	1	3806145	5.42		Conserved hypothetical protein	P-SigA?/ P-SigK*	1.71/ 2.67	112	CAAGTGTAGAATAATCAACTATGCTAATACTCTTTGATAAGTAGTTAGAAATATAGATTTTCATATAACCCCTCCTCTCTACAATACATATACTACAATA
CD630_32540	-1	3809205	3.84		Putative peptidase. S8 or S52 family	TGN-10	3.36938265735	145	AATCTCCTTTTTTACAAATAATTCTAAATTGTGATATAAATCTAAAAATTTTATCTTAACATTTAACCATTTAATGATAATAATTGATATAATAAATATA
CD630_32550	-1	3810898	1.64	rgaR	Two-component response regulator VirR-like	P-SigA ?		64	GGAATTTATCGTAATTTAAGTTTAAATATTAAAGAGAATTTCTATAAGTAGTTTAATCGACAATTTAAATTTATAAAGAAATTTAAATTTGAAAGCTAGT
CD630_32560	-1	3814267	8.9	valS	valyl-tRNA synthetase	P-SigA	4.5270537202	342	ACAACTATATAAAAGAGAATAGACATAATTAAGAAAATTTAGAAAAAATAAAATAAAAATAATTGACAAAGAGAATAATATTTGTATATAATAATATGTA
CD630_32570	-1	3816476	10.19		Putative polysaccharide deacetylase	P-SigE	1.58875401002	1090	CAATAATATCTGTAATATCAGATGCTTGCAAATATTGTGATGAAAATAATAAGGAAGATGAGTCATGTAAGATAAGAAGTAAGCATATTAATTGTAATGA
CD630_32580	-1	3816903	1.85		Iron hydrogenase	P-SigF	1.70789686261	33	AATGATTGAAATAGAGTTGTTGAGAAAGCTAAATAAATCATATTAATAATAGTAGTTAAATAATAAATAAAAAATAGTATCTTTGTAAATATTAAACATA
CD630_32590	-1	3817881	5.69		Putative membrane protein	TGN-10	3.40561571003	55	ACTGCTTTAAAGCAGTTTTTTTATTGTCTAAATTAAGAAAGAATTGATAAAAAAATATGATTAATGGGTAAATTTAAAAAATTGTGATATACTAGGAACA
CD630_32600	-1	3818653	2.26	phoU	Phosphate uptake regulator. PhoU	box-10?		16	GGTTATAGAATTTAGCGATACAAAAACTATGTTTACCACTCCTGTAGATAAAAGAACAGAAGACTATATAACAGGTAGATTTGGTTAAAATATATAACTA
CD630_32630	-1	3821279	4	pstC	ABC-type transport system. phosphate	P-SigH*	2.96957809185	88	GTTTTAAAAGTAAAATTAATGTTAAAAAGTAAATATAATTTTACACTTGCTTAACTTAATCCTAATATAGATTTAACTTAAAAAAAGTAGAATAAAAGTA	CD3263-CD3261
CD630_32690	-1	3829860	2.51		Putative oligoendopeptidase F. M3B family	box-10?	1.62753735068	56	GTATCTTATGCTAAGAGAATACACTTACACGATGTTATGAAAGAAATAAATATGATAGAAGGAGTAATAAATGTAGATTATTTGGACTAAAATATATACA
CD630_32700	-1	3830619	8.8		Putative magnesium transport ATPase. MgtC/SapB family	P-SigK	3.08275445886	84	TTAATAAATAAATACATGTACCTAAGCAAATAGCCCACAGTTGTGGGTTTTTTTGTATCAAAAATTAACAGATGGCTATATTTTACATATATTAATAATA
CD630_32710	-1	3830881	2.52		Conserved hypothetical protein	P-SigA	3.52611195569	34	TAGTATCCAGGTATACAATACCTAAATTAAAGCATTTTTATAGTAAGTTTTATTGACATAATATTGACAAAATATAATATTGTTTGATAAAATGTATATA
CD630_32710	-1	3831245	4		Conserved hypothetical protein	P-SigA	3.45418356644	398	ATAGTTATATTTCCAGGGGCAAAATTGGGTTTGAGCAATATTATAACTTTAATTTCATTAATGTTGTTAGGTGTCAAAGATACTGTTATAATTGTTACTA
CD630_32720	-1	3831463	3.18		Putative membrane protein	box -10		29	TAATTGCACATTGAAATAACTAATATTTATTCTAAATAGATTAAAAATATTTTAGTCTAAATTAGGTGTTTTTATATATTTTGTATTATAATGTAAGATG
CD630_32730	1	3831609	1.03	feoA	Ferrous iron transport protein	P-SigA	4.05814692387	31	AAAATATTTTTAATCTATTTAGAATAAATATTAGTTATTTCAATGTGCAATTACCTCTATAAATCTTGACTTTTTGTATCATACTTGTTACAATTTTAGT	CD3273-CD3274
CD630_32800	-1	3840605	4		Sigma-54 dependent regulator	P-SigA ?	1.45170208142	72	GATAAGAACCTTGAGATTATGTTAAAAAATCTAGATTTTATACTTATAAAAAGTTTGATTTTACAACCTTACAAAAGAGAATCAAGATAGGAATATAATT	CD3280-CD3275
CD630_32830	-1	3845630	11.34	pflE	Pyruvate formate-lyase (activating enzyme)	P-SigA	1.88694570756	89	AATTTACAAAAACAATATAAATATCATAATAAAATAAAATTTTTTAATATTACTAAAAATATATAGACAAAATAATAACAAATATAGTATTATGTAATTG	CD3283-CD3282
CD630_32840	-1	3847072	1.22		Serine protease. HrtA family	box -10 ?	1.26762447084	107	AAACCAGGTTATGAAAAAGAAAAGGAAGAGCTAGAAAAAAGACTTAAATAATTTTAAATAGTTAAGGTTTAATTAAGATTAAAATAATATAATGAAATCA
CD630_32850	-1	3848500	3.38	pgi	Glucose-6-phosphate isomerase	TGN-10	3.63326766125	30	TTTAGAAGAATCGATTTCCTGATAATAAATGATGAGATATGTATGATTTTGTGGCAAACTTTTAAAAAAAACACCTATATTTTGTGTTATAATCTCTTTA
CD630_32870	-1	3852340	3.08		Putative oxidoreductase. FAD dependent			249	AGAAAATATAACACCTTATGAAAATACATATGAATTTAGTGTATATGAATATGATGATGAAATCACCTTAGGTAGTGAAAAGTTATATGTATGTGAATTA	5'UTR P in CD3288 upstream CD3287
CD630_32890	-1	3852852	4.45		Conserved hypothetical protein	box -10	1.67200324337	26	TCTAGTACACTAGGAAAGAGATACAAGGATTTAAAAATATCTTAATTAATTATAAAAAGCTTTAAGTCATAGATAAAGAATCTATAGTATAATATATGTA	CD3289-CD3288
CD630_32900	-1	3854075	4.27		Conserved hypothetical protein	P-SigH	4.62671163297	119	AAAACTATTATCAATTAATAAAATTTTATAGAGGAATTAGTTTTACGATAATTCATTTCTACAAGAGGGATTGTTGATGATTTTATCGAAATCCTAATTA
CD630_32960	-1	3859854	3.56		Putative pilus assembly ATPase	box -10		671	GTAAATGTTTAATATTTAATTAAAGAAAATTATCATATAAAAATAAATTTGTAAGGAGCAATACAGTATGAAAAAACAATATGTGTTTATAATACTAGCA
CD630_32980	-1	3861389	17.82		Putative ATP/GTP-binding protein	P-SigE?	1.7411264224	32	AGATAAAATTAACCTGTTATTAGTATTAGATGGTAAGTTTTAAATTTATCAAAATCAGAAAGCTGTAATAAAATTCTTATAATATGAATATCTTAATTAA
CD630_32990	1	3861632	4		Transporter. Major Facilitator Superfamily	TGN-10	2.47046931005	303	ACAATTTAAGTGTCCATATTGAAATATTTGTATTGTAATACAGCTGGATATTACTTAAATCCAATTGTTTCCATTATAATTTTATGTTAAAATAATATTA	CD3299
CD630_33020	1	3866671	1.84	chrA	Chromate transport protein ChrA	TGN-10	3.24763976277	43	TAATATTATATATTTGAACAAGTTAATTTTCAACATTAATGATAAATTCTTAGAATACTATCATACTATATTATCTTTTTATTATGATATAATATTAATA	CD3302-CD3303
CD630_33050	-1	3869754	1.48	clpP1	ATP-dependent Clp protease	P-SigA	3.96287135959	89	ACAATAGATTTATTAGTTGATAATGCAACAATAGCTTAATAAAATAAACGCTAACTAATATAGTTGACGTTATGAAATGTTTAGTATATAATGATGTGCA	clpP1-clpX
CD630_33060	-1	3871175	2.03	tig	Trigger factor (TF)	P-SigA	2.96091366145	74	ATGGCAAAAAACGCTCAAAAAATTAAATTTTATCAAATAAGTACAACGATATTAATGGAACACTTGTAAATAAAAAAACTTATGTGATATAATTAAGTGG
CD630_33070	-1	3872063	5.05		Putative phosphoesterase		2.93096969681	298	CAGATGATTCTGGCTTAGAAGTAGATGCTTTAGGCAAAAAACCTGGTGTTTATTCAGCTAGATATGCAGGAGAACATGCAACAGATGAAGAAAATAGAAA
CD630_33090	-1	3875375	4	ligA	DNA ligase	TGN-10	2.87713849566	77	ATTTTGATAAAAATAAAAACTCTTATTAGTCGTATTAAAGATACTAATAAGAGTTTTTTTTGTAATAAATTTAAAGCCAAAAAAGTGATATACTAAAAAA
CD630_33110	-1	3877023	4		Conserved hypothetical protein	P-SigB	2.99908513111	77	TTTAGGTTATGATTTGTAGATATTAATCTAATTATTCTAATTTTATATATTAGTTTTGGATAGCCTAACTATTTAAATATAATTTGGGTATTAATATAAA
CD630_33120	1	3877120	2.1		Transporter. Major Facilitator Superfamily	P-SigG	3.20612184673	14	TTTTTATATTAATACCCAAATTATATTTAAATAGTTAGGCTATCCAAAACTAATATATAAAATTAGAATAATTAGATTAATATCTACAAATCATAACCTA
CD630_33170	-1	3884329	1.15	fdhF	Formate dehydrogenase-H (selenocysteine)	P-SigH	3.64624052916	99	AGAATATTTTAATTAAATGGTTGAAATATAAAGATTATTATGACATATTTTTTTTGAAATTTAAGAGGAATTGTGAGAAAATTGTTGAATTTAATAGATA	CD3317-CD3313
CD630_33190	-1	3885664	4		Putative membrane protein	P-SigA	2.1913393301	125	ATAAATGGGTGTAATAAGTATAAGTGTTGTTTAGTGAAAATATTATATATATCTACAAAATGTTTGTAAAATATTAATCTATATATTAAAATTTAATTTA
CD630_33270	-1	3892382	23		Putative conjugative transposon protein Tn916-like	TGN-10	3.16997245121	42	CCATTTTGAATTAGAATTTTTCATTCAAAATCAAATAACTATTTGCAGGAAATACAATCTTAATATTACTTTTGCCACAAAATCTGATATAATATAGACA	CD3327-CD3326
CD630_33300	1	3894158	3.42		Transcriptional regulator	P-SigA	1.88200551845	12	CATAGTTTTATCTTTGATACGCATAATAGGAACTGTACAACTATACAATACGTTTTTCTATACCTGTCACTATTATAACAGGAACAGTAAAATGTATGGA
CD630_33320	1	3895405	4.08		Transcriptional regulator. TetR family	P-SigA	3.37068977122	29	TTAGTAATTTTAAATATTGTAAGACTGTTTGTCAATACAAGAGTTCATTTTTTTTAACCAAATTATTGACTTCATTAATTTGATTACTTAAAATGAAGTA	CD3332-CD3333
CD630_33331	1	3896447	4.04		Putative conjugative transposon protein Tn916-like	P-SigA	3.23088704819	44	TTGGAGTAATGAAATGATATACTCTTAGAACTTTTTAACAAGATTATTGAAGCATAAAATTTTATTGTAGTGCTGATATGAGAATGATATAATTGGGATA	CD3333.1-CD3334
CD630_33420	-1	3906339	3.22		Putative conjugative transposon protein Tn916-like	P-SigA	3.74594109749	27	ACTAGGGGCTTGGGGAGCGTAACTCCCCAAAAGAAAGAAGATGTAATATGATAGTGTATGATAATTGAGATAAACTAAGAATGGTGGTATAATTTCTTTA
CD630_33470	1	3910515	1.39		Putative membrane protein	P-SigA	2.36992309121	34	GGGATAAAAAAATAGACGCCCAGTTTTGAACGTCTTTGTATAATGGTAGAAATATCTACGGTGATTGCAAATAGTATTTTTCCATGTTATCATATTTGTA	CD3347-CD3348
CD630_33500	-1	3915460	1.15		Putative glycosyl transferase. family 2	P-SigE/ P-SigK?	2.005/ 0.67	16	GTTCTTTAGTAACTTTCTGTCGTCAAAAGTTTTTATAAATTTAATAACAAAACAAGAGAAAATACCATATATTACTTATGTCTGCAATATATAGAAGACA
CD630_33500	-1	3916153	3.28		Putative glycosyl transferase. family 2	box -10	1.62041221629	709	TATTTATAGGAGAAGAAATTAATGATGCTATTGCAAGTTTAGTAGTAGCTCAATTACTGTTTTTAGAATCAGAAGACCCAGATTCAGATATAATTATATA	Pinternal CD3351 upstream CD3350
CD630_33550	-1	3919964	2.05		Putative nitroreductase	TGN-10	2.38202029318	53	TTTTTGGGCTCCTTTATTTATTTTAAAGTATCTTTTTAGGTACTATATTACAAAAAAGTGCATTATTGTAATATAGTACCATAGTGATAAAATTATAGCA
CD630_33590	1	3921928	3.13		ABC-type transport system	P-SigA	2.94569165645	433	AAATAACTTTGTAATGATAGATTTACTAAATTAATATAATAATAGTAAATATAACTTTCTTATTGACTATAACTAAGTATTATGATAACATAACTTAAGC
CD630_33640	-1	3930031	2.05		ABC-type transport system. multidrug-family	P-SigA	2.01567325421	408	ATAAATGAAATTTAAATTCAACCTTGAAGAAATAAGCTAAATGTATTAGTATATTAATCCATGCTTGAACATAAATAACCTTTATGATATGATATCAATA
CD630_33640	-1	3929833	4		ABC-type transport system. multidrug-family	TGN-10	3.00293558483	210	CAAGTGTATTTTTAATACATTTAATTTTTGTGTCTTATTCTGCCTTTATAGATAACTGACATATGACAACAAATAGTATTTAAAATATATATTACTTTGT
CD630_33681	-1	3935864	5.52		Putative zinc finger protein	P-SigA	3.19587322331	422	CCACTAGATTTTATAGAATAAGAAAATGAGACAAACATAAATATATGAATATATTAAATTATACTTGAACATACTTATATTTTATGATAAAATTTCAATA	CD3368-CD3368.1
CD630_33682	1	3936231	6		Conserved hypothetical protein	P-SigA	1.98632142512	158	TATTTTTTTTGATATAAAATAACGTTCATATTTGTAAATTTATTTAATTTTCAAATAAGTATATTGAATAATAAGCAATTCTATTGTATTATTGTAATTG
CD630_33750	-1	3946761	1.72	mgtC	Magnesium-transporting ATPase protein C	P-SigA	2.08053500673	21	CATTTTCGGTTTCAGTCCGTCTATTTTCTTACCAAATCGCAAGAAAATCGCAAGACTTTAGCCATAGGATTGTATTTGGATTTTTTATATACTGTTAGTA	CD3375-CD3374
CD630_33770	-1	3950089	6.34	mgtA	Magnesium-transporting ATPase	TGN-10	2.45303988337	29	GATTTGATCGAGCTGAAAAATGCCATATCAAAGTAAATTGCAAGAAAAAAGCAAGAATATAAATATGGCATTTTCAGAACACTGTGTTAAAATGTTATTA	CD3377-CD3376
CD630_33950	-1	3971969	3.92	pfkA	6-phosphofructokinase	P-SigA	1.81475866612	172	GATGAATTTATAAATAACTTAGAAGAGTTACTTCCTAAAGATAACATAAAAGTAAAAGCTTGATTTTTTATATAAAAATCTAAATATATTATAATAATAT	CD3395-CD3394
CD630_33960	-1	3975595	5	dnaE	DNA polymerase III DnaE	P-SigB	3.41764518597	20	TTTATAACATATAATGGTATATGTTGAAGTTAATTCCTATTTTGAGATAAAAGTCTCTGTTTTTGTTTTAGGACATATATTTGTGGTAAAATTAAAATTA
CD630_33980	-1	3977150	4.76		Putative hydrolase. NUDIX family	P-SigH*	5.03844886928	29	AAGTATATATCTAACATAGTTATTGAGTTAGCCCTAAATCATAATTACAACAAAAGTTAGTAAAAAAGGATTTTAAAAAATTGTGTAGAAATCCTTATCA	CD3398-CD3397
CD630_34000	-1	3979182	2.9		Conserved hypothetical protein	P-SigA ?	1.51112508907	17	AAAGAGTTGGTGATTTTGAACTAGCTATGAAGACTATATCTGACTCTAATCTGGATATATCGTTAGTAGAAAACATTATAATATAATAAACATAAGATAA
CD630_34020	-1	3980977	3.84	murB	UDP-N-acetylenolpyruvoylglucosamine reductase	P-SigA	2.06006313037	150	CTTTTAAAGCATTGATATCAGTGATATTGATGCTTTTTTTAAATTATTTATATTCTTTTATATGTTGTTATTTTTTTTTTTTTACTTTATTATATATTTA	CD3402-CD3399
CD630_34050	1	3983809	4		iron-only hydrogenase	P-SigA?	1.73544463135	178	TTAAAGTTTTTTATATGTATTATTTTTTTTTTATTGAATTTAGCTCATTTTTTTTATTTTTTTTAACTATTCTGAATTATTTTATATTATAATAGACTAG	CD3405-CD3407
CD630_34100	-1	3993114	1	uvrC	Excinuclease ABC subunit C	P-SigB	4.17337556837	27	TTCAAATCAATTATAGAAGGGAATATGGGCTTTAACTTGTTTAAAGCACTGGAAATTGTATAACTTTTTAAAATTCATATTTTAGGGTATAATTTTAGTA	CD3410-CD3409
CD630_34120	-1	3998240	4	uvrB	Excinuclease ABC subunit B	P-SigB	3.63948926311	80	AAAGTATTTATTTTCCATGAATTATAGACTTCTATTGCAAAGATAGAAGTCTTTTTTTATGTTTTAGATTTAAGTAAAATTTAAATGGGTAAAATATTTA	CD3412-CD3411
CD630_34360	-1	4028219	7.64	cobC or cobQ	Cobalamin biosynthesis phosphoglycerate mutase CobC	TGN-10?	1.55318914172	-17	ATAGAACTTTCAGAGCTTGTATATTTAATTTACATATATTTGTTAATTTTTATGTTTTTTTAAAGTAAAAAGTGGTGATAATATGATAAGATTAATATTA
CD630_34390	-1	4030762	4	cobT	Nicotinate-nucleotide-dimethylbenzimidazole phosphoribosyltransferase			85	TTACAAAAAGCATCTAATTGTATGCAAATTGACAATGTAAAATAAAGGAAATGAACATAAAATGTAGAATAATTTTTATATGTATGTAAAAATAAAAAGA	CD3439-CD3436
CD630_34391	1	4030872	11.74		Conserved hypothetical protein	P-SigG*	3.143	25	TTACATACATATAAAAATTATTCTACATTTTATGTTCATTTCCTTTATTTTACATTGTCAATTTGCATACAATTAGATGCTTTTTGTAAAAATATATTTA
CD630_34392	-1	4031284	5.13		Conserved hypothetical protein	P-SigH*	4.5263780696	36	TATATTTTGAAAATTTTGTTTTGAAAATTTGGGATTATTTAAGAAATTTTGTATTATAAATAGAAGGAAATAGATAAATTGTATAGAATAAAATATATTA
CD630_34480	-1	4041070	2.99		putative tagatose-bisphosphate aldolase GatY			17	CAGATACTCCATCAGCTACAGGAACAGTAAATCGAGTAGTAAAAGGTGTAACAATATATGAATATTAAAAGATAAGATTAAAATATTATAACTAAATAAT
CD630_34550	-1	4049892	46.84		Putative carboxy-terminal protease	P-SigE	2.57642966241	17	GCAATTGTATTTAATATAAATTTTAGTATAATTTATTGTAATAAAGCAATATATTTGGGTAAATGTAATAAAAATAACAGCTAGTCATATAATAATAATA
CD630_34560	1	4049980	1		5-formyltetrahydrofolate cyclo-ligase	P-SigA	1.9141613267	49	TTTACATAAACTATTATTATTATATGACTAGCTGTTATTTTTATTACATTTACCCAAATATATTGCTTTATTACAATAAATTATACTAAAATTTATATTA
CD630_34570	-1	4051218	33.32		Conserved hypothetical protein	P-SigE	3.03611195146	22	ATGTTTTTTAGTTACATTACATATATTTATAATTATGTATAAATATATACTAATCAATAATTTAGAGTCTAAGATAAGTTTATAAATCATATATTTAGAA
CD630_34580	-1	4052552	5.96		Putative membrane protein	P-SigH	5.4877544547	36	GATTATAAGTTTTAAGTTATTATACTAAAAAGCTATAAAACAGTTATCATGTATTTTATGTTAAAGGAAATTGTAGGTAGTTTATCGAATTGTTTAATCA
CD630_34600	-1	4054739	4.69	tkt	Transketolase	TGN-10	3.52524707449	39	TTTTCTTTTAAATATCTCTTAAGGTTTAATTTTAATGTACTATGTTAATAAAATTAAAAATAACGCAAAAAAATAGCATAAAAGTGATATAATAATATGG	CD3460-CD3459 (tkt')
CD630_34620	-1	4055538	1.33		Putative antitoxin EndoAI	P-SigA	3.0247793793	28	ACTATGAAGTGTTATGTATGATATCAAGAAGAGTTGACCGTGTTTATATGGAAAATAATGAGCTTGTACAAATAAACAGTTATTTGCTAAAATAAAACCA	CD3462-CD3461
CD630_34630	-1	4056828	2.08	alr2	Alanine racemase 2			128	AAAAACTATCTTCAAAATGAGGAGATGAAAGTAAAGTTATCCAAAGGACATTTGGTTTTAGAGACTTTTATTCCTGGGGATAATAAATATTTTAACAAGC
CD630_34640	-1	4057317	11.98		Conserved hypothetical protein	P-SigE	2.22579519293	12	AATAAACAGAGTTCCTGTAGTAGATGATGACAACAAACTTAAAGGTATAATTTGTAGATATGATATAATAAAAGCTTTATACAATGAATAAACTGAAGTA	CD3464-CD3463
CD630_34660	-1	4058263	1.36	acpS	Holo-ACP synthase	P-SigE	1.80075203772	81	ATATAATAGATTTGTATATAATATTCATTACAAATAATTTTAAAAGTTACAGTTTTATTATAATGATTATTAAATTAAGATAAGTAACATAAACTAAATA	CD3466-CD3465
CD630_34660	-1	4058360	3.84	acpS	Holo-ACP synthase			178	ATAATAAATAATATGATGTGTTGATTCGTTTAAAAAATTTAAAATATTTTTAAAATATACATAAAGAATATACTTCTGAAAAAGTGAATGTATTTTCGAT	CD3466-CD3465
CD630_34720	-1	4063848	1.33	atpF	ATP synthase subunit b			70	TAATACTTCTATTCGTAAATCCATTCTTTAAATACTTAGGAATGTAGATTTAGTCCTTAAATATTTTGAGATAGGTTTATAGGTAAATCATCTCAAACTT
CD630_34730	-1	4064190	1.3	atpE	ATP synthase subunit c			29	GCATATATATTTATAATGTTAACAATGGTATTTATATCAAGTGCAGGAGAGTTAGATTAAGAAATCAACTTATATTAAGATAAAAATAAAATAATTTAAA
CD630_34760	-1	4065625	1.7	atpZ	ATP synthase transporter protein AtpZ	P-SigA	2.3534386439	70	AGACAATAAATGTCAAATTATGACACTGAAATACAATGGTATCAAATGATTAAAAGAAAGTATTTGAAAAATCATCAGATTAGTAGTAAGATATATTTTA	CD3476-CD3467
CD630_34770	-1	4066249	4		Putative dCMP deaminase	TGN-10	3.18633648611	174	GGGGTTTTAGAAGCCATACTAAACAATGGGATTTATCCCCAAAATTAATTTATATTAGATAAAGCTATTAATATTTTATTAAGATGATATAATAAATTTA
CD630_34830	-1	4070891	11.68		Putative zinc/iron permease	P-SigA	2.07964019724	23	TTTTAAAGAAGCTGTTTCTTCCTAGAAATTATTTTCTATTTTGAAACAGCTATTTTGCATTTTAGGTCATGTTATCATATTCTATTGTATATAATTGTTA
CD630_34840	-1	4072090	7.64	prfA	Peptide chain release factor 1	P-SigA	1.44509114603	29	TATGAAAAGTAATGGATATAAAAAAATATACACAAAGAAGGATATTCAAGGCATTGATAGAGTTGTTATAGGTTACAATATATGATATAATCAACAATTG
CD630_34860	-1	4073908	8.64		Putative membrane protein	box -10	2.50472287822	44	TTTTATAAAAGTGGAGTTGGAGGAAGCCAACTCCTATTTTATTACAAAAAAACATTCATATTCTACTTTAAATTGTCTTTTTGTATTATAATAATAAATA	CD3486-CD3485
CD630_34880	-1	4077492	3.82	gtaB	UTP-glucose-1-phosphate uridylyltransferase	TGN-10	3.22740863804	61	TCAAAAAATTTGATAGTTTAGTAGCAGAACTTGAAAAGCTATTATAAACATTATTGTAATCCACATGGTAAATATATCGAATTAATGATAAAATATACTA
CD630_34890	-1	4079467	2.27		Putative oligoendopeptidase F. peptidase M3B family	P-SigG	3.55420768303	150	GTGAATATGTTGATTATTATGTGGATAACTATTAATTCGATATTTATTTATATAGTATGAATAATTGAATAATATATCTAAAAAAAGCCATCCTATTATT
CD630_34900	-1	4082184	2.96	spoIIE	Phosphoprotein phosphatase	TGN-10	3.55420768303	24	CTTAATATGTCAAAAGTCAAAAAAAATGTATTAATATTTTTTGATTTTTAAAACCGATTATGACAAAAAAAATTACTCCTCTTTGTTACAATTCTTAATA
CD630_34940	-1	4084393	6.39		Putative spore protein	P-SigG*	1.88448322953	32	TAAGATAAATGAAGTAAAAGAGCATGTATTAAAAAATGATGCAAAAGAAATGTACGAAATTTTAGAATAAAATTAATAGTCCTCTAGTATATTAATAGTA	CD3494-CD3493
CD630_34960	-1	4085312	3.89	hbs	Non-specific DNA-binding protein HBsu	P-SigA	3.37525099216	297	GCTTTGATTGGGACAATGTAGAAGATGTATTTAAAAAAATTGAAGAAGAATATCAGGAATTACTTGACGAACACAGGGTCGGGAATATAAAATACATAAA
CD630_34960	-1	4085084	1		Non-specific DNA-binding protein HBsu	P-SigA	1.88485413756	69	CAATGAACTTGAATAAAAAATTAGAAGACATGACACTTGAAGAGATGGATGAGTTTTGGAATCAGGCTAAAAAACAATAAAATTGTGGAAGGAAATTTGT
CD630_34990	-1	4088959	10.89	spoVT	Stage V sporulation protein T	P-SigF/ SigG	4.73/ 3.485	28	CTAAGACTTAAAAAAAGAGTAATATGCTTAAAAAAGCTATATCTGGATAAGATATAGCTTTTTTTGTATATTTTTCTTAACAATGGTAAAAATAAACTTA
CD630_35000	-1	4090125	4.27	prsA	Peptidylprolyl isomerase PrsA-like	P-SigA	2.3919135494	75	ATATTAAAAATAGAAAAGATAAGACAATTAAAAGATGAAATATTATTAGTTCCAATAACAAAGTATAGAACTAAACAGAAAATAGGTTATAATATAGTTA
CD630_35120	-1	4105009	4.55		Putative type IV pilus transporter system. ATP-binding	TGN-10	3.46869231624	18	TATAATGAAAAATATAATAAAAAAACAGGAAGAAAATCTTCCTGTTTTTTTATACTATTTTCTTTAATGTTCAATTATGAATGATGATATAATTGAGATA	CD3512-CD3507
CD630_35130	-1	4106469	1.01		Putative pilin protein	P-SigA	2.5807587581	834	AAATAAACCTAATAAAGGATATATTATTCAAAATATTATGAATATAAAAAATATTACAAAAAAGTATTGAAAAAATTCAGATTATGTAGTATTATGTAAA
CD630_35130	-1	4105873	2.9		Putative pilin protein	P-SigA ?	1.44327286096	238	AATAGTATAAACAGTGTTGCTAAAATATGGTAGATATTATATAATATAAGTGGATATGTATATACATTATGAGTTATATAATTTTGAATTTAATAAAATA
CD630_35140	-1	4108533	5.18	prs	Ribose-phosphate pyrophosphokinase	TGN-10	3.03765010365	860	TTGTTTTAATGGAAAGAGTCTTAGAGAAGCACTAGATTTGCTAAATAATAACAATTCACAAGGTGAATATTATTTGACTGATACTGCTAAAATAATGAGA
CD630_35150	-1	4109253	4	glmU	Bifunctional protein GlmU	TGN-10	2.44578851039	106	TATATAAAATGGAGAGAGCCCGAACATTTAGGCTCTTTTTAAATGTAGAATTTCTATTAAAATATGTACTTTTTAGTAAAAAAGTGCTATATTATTAGTG
CD630_35160	-1	4109724	49.88	spoVG	Regulator required for spore cortex synthesis	P-SigH	4.80036558644	86	GAATTTGAATTTGAGATAGATGAAGATTAATAAAAAAAATATTTAGAAAAATATGTAAAAATAAAAAGAGGATATCCCTAGTTGTTCATAGAATTATTTA
CD630_35180	1	4110796	1.11	murC	UDP-N-acetylmuramate-L-alanine ligase	P-SigE	2.39308421247	95	TTATATAACGTTAAACTAACTAATGCATAACAATTCTTATTGTGGTATAATATTACTTATGTTTTATTATATTCAAAAATAAAATACATATAATATTATA
CD630_35210	-1	4115392	3.76		Peptidase T. M20B family	P-SigA	3.16934607858	30	TTAGACTCAATTCTTATTTTACTGAAAAAATTAATGAAATGTAGTACAAAACTTTAAAAACTATTGATAATATTTAAATATTACACTACAATATATCTTG
CD630_35220	-1	4116812	8.44		Conserved hypothetical protein	P-SigE	2.55736811139	28	TTAGTATAGAAGAGTTTTCAGTTCTTTCAAATATAATAAATACAAAAGTATCTTCTAAATAGAAGGTACTTTTTTTAATTTTGTTAACATATATTGTTTA
CD630_35240	-1	4118474	2.67		Putative DNA-binding protein			51	TAAGTTTTATATCTAGGCTCTTTTGATATATTTATTTAAAATGCATATTTCTATATAAAAATAAATAGTTTAGTACCTTGATTAAATTAAATAAAAACC
CD630_35270	-1	4122554	3.84		ABC-type transport system. iron-family ATP-binding protein	P-SigD	4.81511246778	162	AATAGATATACTACAGTTTAAAATAGTATATTTTAATTTCATTATTAAAGTATAGATATTATATAAAAGTAAATAAATTATTGAGCGATTATTAATAAG
CD630_35400	-1	4136660	4	metG	Methionyl-tRNA synthetase	P-SigA	3.75350956689	355	TTAGCCATGTTGCAGGTGTCATAGCAGCTGTTTTTATTTGCTATGTAATATTTGTATAATTTGTTGACAATATGGGAAAAATTTTATAATATAGTGATTA
CD630_35420	-1	4137832	19.99	spmA	Spore maturation protein A	P-SigE?	1.9611369637	10	TAAATATTAAAAATTGTAAAAACTCCCACACTTATACTAAAACATAATATAGTACAACTTTCAAGTATAAAGTATTACCTAACTATCATAAAATTATTTA	spmAspmB
CD630_35430	1	4137901	2.5		Putative nicotinate phosphribosyltransferase	P-SigA ?	1.06594398263	53	TATTTTTCCTATTATAATCATCCTCCTCTTTAAATAATTTTATGATAGTTAGGTAATACTTTATACTTGAAAGTTGTACTATATTATGTTTTAGTATAAG
CD630_35440	1	4139267	1.89		Transcriptional regulator. AsnC/Lrp family	P-SigA ?	2.44908127389	154	CAAAGTTAAAGAGCTTCTTAAACCATTGTATATAAAAGGCAGATGCAAATATAATAAAAAAGCTGTTCTTGAAATAAAAAATCATGTACAATATGAATTA
CD630_35500	-1	4145020	4	tmk	Thymidylate kinase			81	AAGATGTAGATTTAAATTTTATACAAGTAATAGATTTAGAAGACATTTAAAAATTATGATATAAAAGTAGATAGAAGTAGATAGTTTAAAATTGTGAAGA	CD3550-CD3548
CD630_35511	-1	4146872	11.61		Putative membrane protein	P-SigF*	3.41785171076	47	GCCTGGGAGAGTAGGACGTAGCCACGTAATTTTTTTTATTTTTTGTCAAAAAAAACAAAAAATACGTATTTCTTTTTTCATTTCGGGAAAACTAAACACA
CD630_35580	-1	4159472	4	birA	BirA bifunctional protein	box -10		44	AGCATCAATATAAAATATAAAACAACCATTATAATAATTAAAAAGGAAATTTAAAATTAATAGTATTAAAAGTATATTAATAATGTATAATTATTTATTA	CD3558-CD3557
CD630_35590	-1	4160546	2.21	ftsH2	Cell division protease FtsH2			-1191	ATGGATGTCTTGGCTAGAAGAACACCAGGATTTACTCCTGCTGATATAGAGAACTTAATGAATGAGGCTGCAATATTAACAGCTAGAAAAAGAGAAAAGA
CD630_35600	-1	4163235	1.93	tilS	tRNA(Ile)-lysidine synthase	TGN-10	2.4670130392	100	CATAGGTACTAAATAATAACTATGGCTATTTTCCAGAAATTTTATAAAGGTAGTGAAAAAACTACCTTTTATTTAATTTATTTGGTATTATTATATTTATA	CD3560-CD3559
CD630_35640	-1	4165994	4.82	spoIIR	Pro-sigma(E) endopeptidase signaling protein	P-SigF/ P-SigG*	3.765/ 1.810	28	AGCTATTTTAAAATGATTGTAATCATTTTAAGATAGCTTTTTTTATTAGATTAAAAAATATTATGAATAAATTAAATTTAATTGGACATAATTGATGATA	CD3564-CD3563(sleB)
CD630_35670	-1	4169365	1.75		Putative phage cell wall hydrolase	P-SigE	1.18683515485	33	CAAGTTTTTAGAGATCAAGATAAATTACAAATAAGTTAAAATTATACCTATTTAAAAATAGGTGTAATTTTTTTTTTGCTCCTTAAATATAAATATAGTG
CD630_35680	-1	4169762	1.32		Conserved hypothetical protein	P-SigA	3.874232233	70	GCCAAAAACAATATTACATTAGCAAAAATTAACATAATTATACTGTATATCTTCAAAAATAGTATTGACATTTTTGCAAAAAATATATAAAATAATTAGT
CD630_35680	-1	4169718	1.2		Conserved hypothetical protein	P-SigA	3.65379453924	26	GTATATCTTCAAAAATAGTATTGACATTTTTGCAAAAAATATATAAAATAATTAGTTTAAACATTTGACAAAAATGTTTATATGTGATATTATGTAAACA
CD630_35690	-1	4170728	4		Sporulation-specific protease	P-SigK	3.26481799963	28	TATACTATAAAAATGCTTTAAGAGTGATAAAAGAAGTATTATAAGAAATGTTTTTTTGACATTAGGAAACAAAGTTTTATATCGAACATAGTATAAACTA
CD630_35701	-1	4172066	5.06		Conserved hypothetical protein			73	TAATTTACAAGGTTGGGAAGATATACTACCAGCAGACCAAAGAAAAGAAATAATAAAGGCTTATAAGAAGTCTAAAACAATAGTTAAAGAAGCAAAAATA
CD630_35740	-1	4175591	4.1		Conserved hypothetical protein			1313	GATATGTTAACATTTTGGGAAAATGGGATTATAGTTATATTTGCATTTATATTATTAGGAATAGGTTATTATTTTTCTAGAAATGTAAAAGATATGGAAA
CD630_35780	-1	4179459	1.71		Resolvase	P-SigA	3.91212869393	59	GGTAATTTTTGACATAGTCAAACAAATTATAAAGGAATTATTATGGTGTCAAAAGTTAACAGTATTGACACCCAAAAATCGTTTTAGTAAAATGGATAAA
CD630_35800	-1	4180825	4		Conserved hypothetical protein	P-SigK	3.58504887985	33	TATTATACCACAAAATTAGTCATTTTTTGCTGTTTTAGATACTTTCTATTCTTTACATTTACCATTAACATTATTACTGTTTTAAGCATATTATATTGTA
CD630_35810	1	4180842	4		Conserved hypothetical protein	P-SigA	2.19511960391	118	ACATATAATATATTATATGTACAGGTATTTGTAGATTGATAATTTTCCATTAAAATCCTCCCCCTTTTATAAAAAAATCAGATACAATATAATATGCTTA	CD3581-CD3583
CD630_35810	1	4180885	2.62		Conserved hypothetical protein			75	TTTCCATTAAAATCCTCCCCCTTTTATAAAAAAATCAGATACAATATAATATGCTTAAAACAGTAATAATGTTAATGGTAAATGTAAAGAATAGAAAGTA
CD630_35850	-1	4186789	3.6		ABC-type transport system	P-SigA ?	1.76143492111	26	CCCACAAGGTGGTGCAATATTTGTTATTCGTTTTCCAAAGTGACGAATCTCTCATTTAAATGTCACTTAAATGTAAGTTGAAAGTCCTATGATATATTTA	CD3585-CD3584
CD630_35880	-1	4192289	1.64	carB1	Carbamoyl-phosphate synthase large chain 1			75	ACTAAAAAACAAGAATAACTTAAATCAAAAAGTTTGGTTTAATTAACATAGATGTATTAAATAGATGTATTGATGAGTAAATTTGAACTTAAGATAAAAT
CD630_35890	-1	4193528	1.66	carA	Carbamoyl-phosphate synthase small chain	P-SigF	2.90945825134	72	TAACTTCTTTTTTTTAAGAAATTTGTAGTATAATAGAAAAAGATAAAAAATAAATGTAAATAAGTATAAAACTAGAATGTAAAAGTGAAAAATAGATATA
CD630_35930	-1	4199836	1.73		Conserved hypothetical protein			115	TAGATGTTTCATATGAAAAACTTCCTATAAGGAATAAAATAGGAAAATCATATTTTATAACTGTAGTCGAGCATGTGAAACCAGAAGAAGAAACCCAAGA
CD630_35950	1	4201209	2.96		Aminopeptidase	P-SigF	2.94388039345	98	AATAAGTTTGTTATCCTCATAATCTGTTTTAATTAAAATATTTTTTTATTTCTCAATCTATAAAGTATAAATATTTTGAATATGACCCAAAATCTAAGTA
CD630_35980	-1	4206459	1.58	luxS	S-ribosylhomocysteine lyase	P-SigA	3.32146330176	195	ACAATCAGCTTAGTTATAAAATAAAAGTACGATTATGTGATATAAATATTATAACAATAAAGTGTTTACAAAAATAAAAAAGTAATATATAATTTAAGTC	CD3598-CD3596
CD630_36000	-1	4208450	6.81		two component system	box -10	2.01462624985	41	TAAATAATATAAATGTGTAAATAATTTGTATTATATTGGAAATTTAGAAATTAATAAATTTATAGATTACACTAACTAAAATATAGTATAATTTTATATG	CD3600-CD3599
CD630_36050	-1	4213009	4		Putative phosphatase	box-10?	1.17544747539	38	TTTATTTTTAAAATAAATATATAAGATTTAATTGGTACTTAAGCTATAGTATTAGAAATTTCTATTACTATAGCTTTTTAAAATAGATAAACTTAATATA
CD630_36051	-1	4213353	1.61		Ferredoxin	P-SigB	3.42844135104	45	TTTATAGACATGGATACGAAAATACTATAATAAACTAAACAATAGTGATAAAATAATAAATATATGTTTAAATTGGTATATATTGGATAAATATCTAAGG
CD630_36051	-1	4213393	1.51		Ferredoxin	TGN-10	2.73810410578	85	TTGCAATATACTGTAAAATCATGGATGAAAAGCAGTGAAGTTTATAGACATGGATACGAAAATACTATAATAAACTAAACAATAGTGATAAAATAATAAA
CD630_36080	-1	4216448	3.2		ABC-type transport system. ATP-binding protein	TGN-10	3.04031635446	40	TCATCTTTTTTACTTTTCAATAACTTTGTTTTATTATTTAATATACATTTTATCTCCTTAGAGTTGCTGATATATAAAAATTACTGATATAATAAAAGAA	CD3608-CD3607
CD630_36090	-1	4216882	3.04		Conserved hypothetical protein	TGN-10	3.54293294012	78	TTTCTTTTAAAGACCAAGATGGAAATGATTATTTGGTCAGAGAGGATAAATAATTTTACAAAGTATTAAATTTACTCAATATCTGATATAATTAGAGACA
CD630_36100	-1	4217355	1.21		Conserved hypothetical protein	P-SigB	3.69938690531	46	ACATTATAAATTATATATTGAGCAGAATTACATAATTTGGCGATAAATATTAGAAATATATATCTATAGAAAATAATATATATGGGTATATTATTAAATA
CD630_36100	-1	4217455	4		Conserved hypothetical protein	P-SigB	3.54938880129	146	AACTCTATTTAGAAGTGATTTTTTATGTAGTTATTATCATAATTATAAGTATGATATATAAGGTGATTAAATTACATAAATAAAGGCTATAATAGTATGG
CD630_36130	1	4219362	5.26		Conserved hypothetical protein	P-SigK	2.26568008329	26	TAATATTATTTAATCATCCAAACTTTTACCACTTTTTCAATATATAAAATATTACACTTTAGATGTAACAAAATCGCATCCATTTAAATATTGTATTTTA
CD630_36180	1	4224941	3.01		Conserved hypothetical protein	TGN-10	3.06185496268	59	AACCTTCCGTACATATAACATTTTTTTAAATTAATAAATTTGTATAATATAATAATAAAAAATTATATACTTCAAGGTTTCCCTATGATACAATTTACTA
CD630_36190	-1	4226102	4.34		Putative acyl-CoA N-acyltransferase	box -10?	1.44474239456	114	GTCATAAATTCCTTTTTACTACTCAAATAGAAGCACCTTTAGTATAAGCTGATGTGAATTATTGTAGTGAATTTGCTAGATTATAGTATAATAATATATA
CD630_36250	-1	4234578	1.91		Putative signaling protein	TGN-10	3.68091954191	304	TACATTTCTATTATATTACATATAATTTCAGTAATTTTATATTAATTTTTCTATCTGGAAAAAAATGATTTAAAACTTAAGTTATGATATAATTTCATTA
CD630_36270	-1	4236477	4	dapA4	Dihydrodipicolinate synthase 4 (DHDPS)	box-10?	1.5991207607	82	GTTAAACAGGAAGGAGATTGTCTTAATAAAGCTCCTCGTGCTTCAATTTTAGCTGAAACAATAATATTACAATCATTAAGTGTTGTATTACAATATGCTA
CD630_36380	-1	4248132	7.13		Conserved hypothetical protein	P-SigE	1.70620451092	108	AGTATAAGAAAATTTACTTTTAAAGAATATTAGAAAATATTTGTATAAAAATATATGTTTTAAGTATATCTTTACATTAGATTTTATAAATTTATTAATA
CD630_36390	1	4248188	4		Transcriptional regulator. LysR family	box-10?	1.53621374625	109	CTTAAATCCAATATCGTTTTCATTGGAATATATAAGTTATTCTTATTAATAAATTTATAAAATCTAATGTAAAGATATACTTAAAACATATATTTTTATA
CD630_36390	1	4248242	4		Transcriptional regulator. LysR family	box -10	2.47242873716	55	TTATAAAATCTAATGTAAAGATATACTTAAAACATATATTTTTATACAAATATTTTCTAATATTCTTTAAAAGTAAATTTTCTTATACTATAATAAGCTT
CD630_36410	-1	4251951	2.81		Conserved hypothetical protein			848	TGCACAGAGTGTGGGAGCAATGATAGCAAAAGATGATATGAGTCTAGTTTACAATGTAAATAATCCTAAGAAACAAGTTAAAAGGGAAATAATAATTCCA
CD630_36510	-1	4261409	3.98		Putative metallo-beta-lactamase-like hydrolase	TGN-10	3.48110931464	25	AAGTAAATAGTGAATGTAAGTAAATAGTGAATGTAAGTAAATTTTGTGCAGAGTATTAAATTTTATTTAATACTCTGTTTTTTTGGTATAATATAATTTA
CD630_36530	1	4263080	4	dnaD	DNA replication protein DnaD/DnaB	TGN-10	3.07124435129	11	TTCAAAATGAATACTTTTAGAAAATATTTACATGCTAATCTTGTAACCTTTTATTTGTTTACAGACAAATATAATATAAAAAATGATATAATTTAATCTG
CD630_36550	-1	4267533	6.76	purA	Adenylosuccinate synthetase	P-SigA	3.26730601222	41	TAGAGAAAGAAGAGTTTTCAAAAATAGAAGAATATATGTTAAATATTGGAGAATACTAAAAAAGTTGAAAAAAATACGAATGTTTGATAGAATAAGTAAG
CD630_36570	-1	4269436	1.74	dnaB	Replicative DNA helicase			21	TTAGATGAACCAATAAGATCTTTAGGTTCAACTTTTGTAGAAATAAAAATACATCAAAAAGTAACTACTAAAATAAGAGTGGATGTAAAAGAAAAACAGT
CD630_36580	-1	4270049	4.18	rplI	50S ribosomal protein L9	P-SigA?	1.11701778957	166	TATAAATGTTATAATAGCTCAAACTGCTGATGAGTTATTAAATATCAAAGAAGTAGAAGCTTCCTTTGTATTAGGTGAAAAAGATGATACTATATTTATA
CD630_36610	-1	4273192	17.9		Conserved hypothetical protein	TGN-10	3.17066509081	19	TTATTATATGTATTTATATATCTAAATGAGGCGAGCTATAAAGCTCGTTTTTTTGTTTATATACTTAAATATATTATTATTTATGATATAATATTATATA	CD3661-CD3659
CD630_36630	-1	4274383	1.14	rpsF	30S ribosomal protein S6	P-SigA	3.99941468691	72	CCATCCCTTGTTTGTTTGAAAAGTATATAATTCACCTTATACTAAACTTTGTCCAAAATTTAAATTGACAGAAATAAGAATAAATGATAAAATGTGTAGG
CD630_36640	-1	4275789	1.52		Putative aminotransferase			68	TCAAGGCTAATAATGCTTGATAGAGAGACCTTAGAAAAGAGAGTAAAAAAGCTAATAAAAAAGTGATAAAAATTTAACACTTAAAAATGTCAAATACCGT
CD630_36670	-1	4276993	3.23		Conserved hypothetical protein. SirA family	TGN-10	2.64193278013	32	ATGTACAAAAACTTAGAAATAATGTAGGGTAAATAAACCTATAAGGGTATAGAAACAATCTATAACAAGCAAGATAATATCTATGATAAAATATAAATTG
CD630_36680	-1	4278390	3.74	rstA	Transcriptional regulator. TPR family	box -10?	1.79033416677	32	AAATTTTAGTCATTTTTATGGGAAATCATTTAATGTACAGTGAAAATATTGTAAAATAAAAGTAGTGTTTTTAAAATAAATATAAGTTATAATTATATTA
CD630_36690	1	4278587	2.76		Putative exported protein	P-SigA	1.92750138726	31	TTAGTTTATTTTGAGTTTTATTAATTTAAATAAATCATTTTTTAAATTTGTTACTATTTTGTATTCATATATTTGCTCATAACGACTATAATTATATATA
CD630_36720	-1	4282154	3.26	soj	Transcriptional regulator. sporulation initiation inhibitor			14	CTTTTTTTGTAATATAAGCCTTGTAATATAAACTGATTTATAGACATTATTTATACTTAAAAAACACCTATTCAACATTTAAAATTAATTTAATTCTTAA	CD3572-CD3570
CD630_36730	-1	4283155	4		Putative stage 0 sporulation protein. DNA-binding protein Spo0J-like	P-SigH	2.2153958622	95	CTGGTAAACCAGCCAAAAATCCTATTAAGTAATGAAAAATTTATTATTGGTAAGCTTAATTATTTCTCAGGAAATAATTAAGCTTACTGTAAAAAAACAA
CD630_36800	-1	4289667	6.54	rpmH	50S ribosomal protein L34	P-SigA	4.16605943399	73	CAATAAAAAAAATACATAATATATATATGGTAGATTTTGTGATATAAGCGTCCCAAAAACTCGTTGACAACAGTAGTAAAAGTATTTATAATTATATGTG
CD630_36800	-1	4289740	4.23		50S ribosomal protein L34	P-SigF/ P-SigA ?	1.777/ 1.643	146	AATTACTTTATTTGTGTATATAATTGAAAAAAATAATTTAGAATAAAATTAAATAGATTTTTGCTAGTATTTTCAATAAAAAAAATACATAATATATATA
Genes indicated in red in column A correspond to mobile genetic elements and genes overlined indicate dual promoters. The position of the transcriptional start sites are indicated in blue (column C). The position of 5’ start was identified by RNA-seq analysis with indicated score corresponding to the read length (51 bases) coverage ratio for TAP+ and TAP- sample. The score for each promoter was d…

## Sheet: PhageTerm_Analysis
PhageTerm Analysis
Nbr	Detect	Known (Manual)	Unknown (New)	New Validate Manual
TSS	856	633	223	31
	CD630_00030	CD630_00170	CD630_00030	CD630_00720
	CD630_00170	CD630_00210	CD630_r0010	CD630_00950
	CD630_00210	CD630_00470	CD630_s0020	CD630_01300
	CD630_00470	CD630_00510	CD630_r0040	CD630_03240
	CD630_00510	CD630_00511	CD630_r0060	CD630_06520
	CD630_00511	CD630_00520	CD630_t0200	CD630_07500
	CD630_00520	CD630_00570	CD630_t0280	CD630_08100
	CD630_00570	CD630_00650	CD630_t0340	CD630_08800
	CD630_00620	CD630_00680	CD630_00620	CD630_08800
	CD630_00640	CD630_01040	CD630_RNA_14	CD630_08800
	CD630_00650	CD630_01060	CD630_00640	CD630_09890
	CD630_00680	CD630_01190	CD630_00690	CD630_12150
	CD630_00690	CD630_01240	CD630_00720	CD630_16240
	CD630_00720	CD630_01250	CD630_00730	CD630_18220
	CD630_00730	CD630_01270	CD630_00941	CD630_19801
	CD630_00941	CD630_01340	CD630_00950	CD630_20340
	CD630_00950	CD630_01390	CD630_r0070	CD630_21070
	CD630_01040	CD630_01560	CD630_t0460	CD630_21200
	CD630_01060	CD630_01632	CD630_r0090	CD630_24600
	CD630_01190	CD630_01670	CD630_t0530	CD630_24960
	CD630_01240	CD630_01710	CD630_t0580	CD630_27200
	CD630_01250	CD630_01720	CD630_t0590	CD630_27600
	CD630_01270	CD630_01721	CD630_r0100	CD630_27600
	CD630_01300	CD630_01840	CD630_t0650	CD630_27950
	CD630_01310	CD630_01880	CD630_r0120	CD630_27950
	CD630_01340	CD630_02180	CD630_r0130	CD630_32990
	CD630_01390	CD630_02290	CD630_t0660	CD630_35140
	CD630_01560	CD630_02390	CD630_r0150	CD630_36080
	CD630_01632	CD630_02790	CD630_r0160	CD630_r0320
	CD630_01670	CD630_02950	CD630_t0690	CD630_t0790
	CD630_01710	CD630_02960	CD630_t0740	CD630_t0800
	CD630_01720	CD630_03100	CD630_01300
	CD630_01721	CD630_03110	CD630_01310
	CD630_01840	CD630_03220	CD630_r0210
	CD630_01880	CD630_03450	CD630_03240
	CD630_02180	CD630_03470	CD630_04020
	CD630_02290	CD630_03500	CD630_04760
	CD630_02390	CD630_03550	CD630_04770
	CD630_02790	CD630_03880	CD630_04780
	CD630_02950	CD630_03930	CD630_05000
	CD630_02960	CD630_03940	CD630_05081
	CD630_03100	CD630_03950	CD630_05103
	CD630_03110	CD630_04030	CD630_052501
	CD630_03220	CD630_04040	CD630_060601
	CD630_03240	CD630_04270	CD630_06520
	CD630_03450	CD630_04360	CD630_s0180
	CD630_03470	CD630_04390	CD630_07190
	CD630_03500	CD630_04401	CD630_07200
	CD630_03550	CD630_04420	CD630_07240
	CD630_03880	CD630_04810	CD630_07360
	CD630_03930	CD630_04900	CD630_t0790
	CD630_03940	CD630_04960	CD630_07470
	CD630_03950	CD630_05071	CD630_07500
	CD630_04020	CD630_05160	CD630_07570
	CD630_04030	CD630_05190	CD630_07580
	CD630_04040	CD630_05440	CD630_07680
	CD630_04270	CD630_05450	CD630_08070
	CD630_04360	CD630_05460	CD630_08100
	CD630_04390	CD630_05470	CD630_08160
	CD630_04401	CD630_05510	CD630_08280
	CD630_04420	CD630_05540	CD630_08550
	CD630_04760	CD630_05590	CD630_08560
	CD630_04770	CD630_05640	CD630_08800
	CD630_04780	CD630_05690	CD630_09030
	CD630_04810	CD630_05760	CD630_090303
	CD630_04900	CD630_05860	CD630_09890
	CD630_04960	CD630_05870	CD630_10030
	CD630_05000	CD630_06010	CD630_10050
	CD630_05071	CD630_06020	CD630_10070
	CD630_05081	CD630_06040	CD630_10130
	CD630_05103	CD630_06080	CD630_10230
	CD630_05160	CD630_06290	CD630_10330
	CD630_05190	CD630_06340	CD630_t0800
	CD630_052501	CD630_06421	CD630_10580
	CD630_05440	CD630_06570	CD630_10590
	CD630_05450	CD630_06641	CD630_10830
	CD630_05460	CD630_06642	CD630_10991
	CD630_05470	CD630_06840	CD630_11240
	CD630_05510	CD630_06970	CD630_11830
	CD630_05540	CD630_07040	CD630_12080
	CD630_05590	CD630_07060	CD630_12150
	CD630_05640	CD630_07080	CD630_12332
	CD630_05690	CD630_07110	CD630_12480
	CD630_05760	CD630_07120	CD630_12540
	CD630_05860	CD630_07150	CD630_12800
	CD630_05870	CD630_07160	CD630_13140
	CD630_06010	CD630_07180	CD630_13380
	CD630_06020	CD630_07290	CD630_14182
	CD630_06040	CD630_07300	CD630_14230
	CD630_060601	CD630_07340	CD630_Cdi1_10
	CD630_06080	CD630_07390	CD630_n00520
	CD630_06290	CD630_07440	CD630_s0250
	CD630_06340	CD630_07600	CD630_14990
	CD630_06421	CD630_07610	CD630_s0270
	CD630_06520	CD630_07700	CD630_15380
	CD630_06570	CD630_07730	CD630_15460
	CD630_06641	CD630_07760	CD630_15820
	CD630_06642	CD630_07770	CD630_16020
	CD630_06840	CD630_07810	CD630_16240
	CD630_06970	CD630_07850	CD630_16360
	CD630_07040	CD630_07900	CD630_16671
	CD630_07060	CD630_07940	CD630_17170
	CD630_07080	CD630_07950	CD630_171801
	CD630_07110	CD630_07960	CD630_17300
	CD630_07120	CD630_08000	CD630_175911
	CD630_07150	CD630_08090	CD630_18090
	CD630_07160	CD630_08120	CD630_18140
	CD630_07180	CD630_08250	CD630_18200
	CD630_07190	CD630_08300	CD630_182001
	CD630_07200	CD630_08350	CD630_18220
	CD630_07240	CD630_08380	CD630_18320
	CD630_07290	CD630_08410	CD630_189101
	CD630_07300	CD630_08420	CD630_n00650
	CD630_07340	CD630_08440	CD630_n00660
	CD630_07360	CD630_08530	CD630_192701
	CD630_07390	CD630_08650	CD630_19720
	CD630_07440	CD630_08690	CD630_19800
	CD630_07470	CD630_08730	CD630_19801
	CD630_07500	CD630_08750	CD630_20270
	CD630_07570	CD630_08780	CD630_20340
	CD630_07580	CD630_08820	CD630_21070
	CD630_07600	CD630_08870	CD630_21170
	CD630_07610	CD630_08920	CD630_21200
	CD630_07680	CD630_08930	CD630_21380
	CD630_07700	CD630_08940	CD630_21390
	CD630_07730	CD630_08960	CD630_21460
	CD630_07760	CD630_08970	CD630_21530
	CD630_07770	CD630_09020	CD630_21610
	CD630_07810	CD630_09390	CD630_21620
	CD630_07850	CD630_09420	CD630_21740
	CD630_07900	CD630_09562	CD630_21770
	CD630_07940	CD630_09750	CD630_22040
	CD630_07950	CD630_09860	CD630_22270
	CD630_07960	CD630_09930	CD630_22610
	CD630_08000	CD630_09940	CD630_22990
	CD630_08070	CD630_09990	CD630_23011
	CD630_08090	CD630_10220	CD630_23400
	CD630_08100	CD630_10470	CD630_23520
	CD630_08120	CD630_10490	CD630_23540
	CD630_08160	CD630_10632	CD630_23550
	CD630_08250	CD630_10640	CD630_23740
	CD630_08280	CD630_10800	CD630_23780
	CD630_08300	CD630_10850	CD630_23810
	CD630_08350	CD630_10910	CD630_23870
	CD630_08380	CD630_10970	CD630_23950
	CD630_08410	CD630_11030	CD630_23980
	CD630_08420	CD630_11190	CD630_24060
	CD630_08440	CD630_11230	CD630_24100
	CD630_08530	CD630_11241	CD630_24350
	CD630_08550	CD630_11261	CD630_24440
	CD630_08560	CD630_11320	CD630_24600
	CD630_08650	CD630_11330	CD630_24610
	CD630_08690	CD630_11350	CD630_24960
	CD630_08730	CD630_11360	CD630_25020
	CD630_08750	CD630_11370	CD630_n00860
	CD630_08780	CD630_11490	CD630_25200
	CD630_08800	CD630_11610	CD630_25210
	CD630_08820	CD630_11640	CD630_s0520
	CD630_08870	CD630_11690	CD630_25360
	CD630_08920	CD630_11900	CD630_25400
	CD630_08930	CD630_12000	CD630_25530
	CD630_08940	CD630_12120	CD630_25760
	CD630_08960	CD630_12140	CD630_26000
	CD630_08970	CD630_12210	CD630_26140
	CD630_09020	CD630_12331	CD630_26470
	CD630_09030	CD630_12401	CD630_26520
	CD630_090303	CD630_12420	CD630_26610
	CD630_09390	CD630_12460	CD630_26970
	CD630_09420	CD630_12511	CD630_27200
	CD630_09562	CD630_12550	CD630_27600
	CD630_09750	CD630_12570	CD630_27860
	CD630_09860	CD630_12600	CD630_27950
	CD630_09890	CD630_12630	CD630_28020
	CD630_09930	CD630_12750	CD630_28320
	CD630_09940	CD630_12810	CD630_28890
	CD630_09990	CD630_12850	CD630_295215
	CD630_10030	CD630_12860	CD630_295216
	CD630_10050	CD630_12870	CD630_295217
	CD630_10070	CD630_12890	CD630_29560
	CD630_10130	CD630_12900	CD630_29630
	CD630_10220	CD630_13011	CD630_30300
	CD630_10230	CD630_13040	CD630_30430
	CD630_10330	CD630_13170	CD630_30640
	CD630_10470	CD630_13190	CD630_s0591
	CD630_10490	CD630_13240	CD630_31370
	CD630_10580	CD630_13280	CD630_31580
	CD630_10590	CD630_13300	CD630_31870
	CD630_10632	CD630_13320	CD630_31880
	CD630_10640	CD630_13390	CD630_32190
	CD630_10800	CD630_13400	CD630_32250
	CD630_10830	CD630_13480	CD630_32290
	CD630_10850	CD630_13530	CD630_32340
	CD630_10910	CD630_13540	CD630_32360
	CD630_10970	CD630_13550	CD630_32430
	CD630_10991	CD630_13560	CD630_s0631
	CD630_11030	CD630_13600	CD630_32810
	CD630_11190	CD630_13920	CD630_32990
	CD630_11230	CD630_13940	CD630_33080
	CD630_11240	CD630_13960	CD630_33240
	CD630_11241	CD630_13990	CD630_33250
	CD630_11261	CD630_14000	CD630_33720
	CD630_11320	CD630_14010	CD630_33730
	CD630_11330	CD630_14020	CD630_33930
	CD630_11350	CD630_14040	CD630_34030
	CD630_11360	CD630_14090	CD630_34170
	CD630_11370	CD630_14130	CD630_r0290
	CD630_11490	CD630_14160	CD630_34610
	CD630_11610	CD630_14170	CD630_34780
	CD630_11640	CD630_14250	CD630_34861
	CD630_11690	CD630_14310	CD630_34970
	CD630_11830	CD630_14340	CD630_34980
	CD630_11900	CD630_14360	CD630_Cdi2_4
	CD630_12000	CD630_14630	CD630_35140
	CD630_12080	CD630_14740	CD630_r0320
	CD630_12120	CD630_14810	CD630_35530
	CD630_12140	CD630_14870	CD630_35620
	CD630_12150	CD630_14890	CD630_35660
	CD630_12210	CD630_14920	CD630_35700
	CD630_12331	CD630_14940	CD630_36080
	CD630_12332	CD630_14980	CD630_361101
	CD630_12401	CD630_15110	CD630_36160
	CD630_12420	CD630_15111	CD630_36750
	CD630_12460	CD630_15220	CD630_36781
	CD630_12480	CD630_15230
	CD630_12511	CD630_15340
	CD630_12540	CD630_15360
	CD630_12550	CD630_15410
	CD630_12570	CD630_15420
	CD630_12600	CD630_15431
	CD630_12630	CD630_15461
	CD630_12750	CD630_15550
	CD630_12800	CD630_15670
	CD630_12810	CD630_15750
	CD630_12850	CD630_15760
	CD630_12860	CD630_15770
	CD630_12870	CD630_15831
	CD630_12890	CD630_15900
	CD630_12900	CD630_15951
	CD630_13011	CD630_15960
	CD630_13040	CD630_15980
	CD630_13140	CD630_16120
	CD630_13170	CD630_16130
	CD630_13190	CD630_16140
	CD630_13240	CD630_16200
	CD630_13280	CD630_16210
	CD630_13300	CD630_16220
	CD630_13320	CD630_16290
	CD630_13380	CD630_16300
	CD630_13390	CD630_16340
	CD630_13400	CD630_16560
	CD630_13480	CD630_16570
	CD630_13530	CD630_16620
	CD630_13540	CD630_16650
	CD630_13550	CD630_16670
	CD630_13560	CD630_16750
	CD630_13600	CD630_16900
	CD630_13920	CD630_16920
	CD630_13940	CD630_16960
	CD630_13960	CD630_17070
	CD630_13990	CD630_17110
	CD630_14000	CD630_17120
	CD630_14010	CD630_17160
	CD630_14020	CD630_17260
	CD630_14040	CD630_17270
	CD630_14090	CD630_17290
	CD630_14130	CD630_17400
	CD630_14160	CD630_17451
	CD630_14170	CD630_17470
	CD630_14182	CD630_17490
	CD630_14230	CD630_17510
	CD630_14250	CD630_17520
	CD630_14310	CD630_17590
	CD630_14340	CD630_17620
	CD630_14360	CD630_17670
	CD630_14630	CD630_17671
	CD630_14740	CD630_17690
	CD630_14810	CD630_17710
	CD630_14870	CD630_17920
	CD630_14890	CD630_17970
	CD630_14920	CD630_17980
	CD630_14940	CD630_18010
	CD630_14980	CD630_18020
	CD630_14990	CD630_18070
	CD630_15110	CD630_18100
	CD630_15111	CD630_18240
	CD630_15220	CD630_18270
	CD630_15230	CD630_18311
	CD630_15340	CD630_18640
	CD630_15360	CD630_18710
	CD630_15380	CD630_18760
	CD630_15410	CD630_18820
	CD630_15420	CD630_18830
	CD630_15431	CD630_18840
	CD630_15460	CD630_18980
	CD630_15461	CD630_19000
	CD630_15550	CD630_19100
	CD630_15670	CD630_19310
	CD630_15750	CD630_19340
	CD630_15760	CD630_19350
	CD630_15770	CD630_19390
	CD630_15820	CD630_19400
	CD630_15831	CD630_19401
	CD630_15900	CD630_19410
	CD630_15951	CD630_19530
	CD630_15960	CD630_19670
	CD630_15980	CD630_19740
	CD630_16020	CD630_19870
	CD630_16120	CD630_19902
	CD630_16130	CD630_19904
	CD630_16140	CD630_19921
	CD630_16200	CD630_19930
	CD630_16210	CD630_19942
	CD630_16220	CD630_19980
	CD630_16240	CD630_20000
	CD630_16290	CD630_20040
	CD630_16300	CD630_20171
	CD630_16340	CD630_20470
	CD630_16360	CD630_20480
	CD630_16560	CD630_20550
	CD630_16570	CD630_20570
	CD630_16620	CD630_20580
	CD630_16650	CD630_20590
	CD630_16670	CD630_20610
	CD630_16671	CD630_20630
	CD630_16750	CD630_20670
	CD630_16900	CD630_20760
	CD630_16920	CD630_20920
	CD630_16960	CD630_20980
	CD630_17070	CD630_21020
	CD630_17110	CD630_21100
	CD630_17120	CD630_21120
	CD630_17160	CD630_21140
	CD630_17170	CD630_21151
	CD630_171801	CD630_21270
	CD630_17260	CD630_21400
	CD630_17270	CD630_21440
	CD630_17290	CD630_21480
	CD630_17300	CD630_21490
	CD630_17400	CD630_21501
	CD630_17451	CD630_21580
	CD630_17470	CD630_21660
	CD630_17490	CD630_21670
	CD630_17510	CD630_21680
	CD630_17520	CD630_21810
	CD630_17590	CD630_21840
	CD630_175911	CD630_21950
	CD630_17620	CD630_22090
	CD630_17670	CD630_22140
	CD630_17671	CD630_22200
	CD630_17690	CD630_22210
	CD630_17710	CD630_22280
	CD630_17920	CD630_22451
	CD630_17970	CD630_22470
	CD630_17980	CD630_22510
	CD630_18010	CD630_22590
	CD630_18020	CD630_22640
	CD630_18070	CD630_22660
	CD630_18090	CD630_22720
	CD630_18100	CD630_22740
	CD630_18140	CD630_22780
	CD630_18200	CD630_22950
	CD630_182001	CD630_22991
	CD630_18220	CD630_23010
	CD630_18240	CD630_23220
	CD630_18270	CD630_23340
	CD630_18311	CD630_23440
	CD630_18320	CD630_23470
	CD630_18640	CD630_23690
	CD630_18710	CD630_23730
	CD630_18760	CD630_23750
	CD630_18820	CD630_23790
	CD630_18830	CD630_23820
	CD630_18840	CD630_23861
	CD630_189101	CD630_23900
	CD630_18980	CD630_23960
	CD630_19000	CD630_24030
	CD630_19100	CD630_24090
	CD630_192701	CD630_24120
	CD630_19310	CD630_24260
	CD630_19340	CD630_24291
	CD630_19350	CD630_24300
	CD630_19390	CD630_24330
	CD630_19400	CD630_24351
	CD630_19401	CD630_24400
	CD630_19410	CD630_24450
	CD630_19530	CD630_24461
	CD630_19670	CD630_24500
	CD630_19720	CD630_24590
	CD630_19740	CD630_24591
	CD630_19800	CD630_24630
	CD630_19801	CD630_24650
	CD630_19870	CD630_24700
	CD630_19902	CD630_24730
	CD630_19904	CD630_24790
	CD630_19921	CD630_24800
	CD630_19930	CD630_24820
	CD630_19942	CD630_24910
	CD630_19980	CD630_25040
	CD630_20000	CD630_25090
	CD630_20040	CD630_25120
	CD630_20171	CD630_25130
	CD630_20270	CD630_25140
	CD630_20340	CD630_25171
	CD630_20470	CD630_25180
	CD630_20480	CD630_25220
	CD630_20550	CD630_25240
	CD630_20570	CD630_25270
	CD630_20580	CD630_25320
	CD630_20590	CD630_25390
	CD630_20610	CD630_25500
	CD630_20630	CD630_25590
	CD630_20670	CD630_25621
	CD630_20760	CD630_25622
	CD630_20920	CD630_25640
	CD630_20980	CD630_25730
	CD630_21020	CD630_25770
	CD630_21070	CD630_25930
	CD630_21100	CD630_26130
	CD630_21120	CD630_26160
	CD630_21140	CD630_26270
	CD630_21151	CD630_26290
	CD630_21170	CD630_26360
	CD630_21200	CD630_26410
	CD630_21270	CD630_26420
	CD630_21380	CD630_26460
	CD630_21390	CD630_26550
	CD630_21400	CD630_26640
	CD630_21440	CD630_26680
	CD630_21460	CD630_26710
	CD630_21480	CD630_26830
	CD630_21490	CD630_26860
	CD630_21501	CD630_26871
	CD630_21530	CD630_26880
	CD630_21580	CD630_26910
	CD630_21610	CD630_26930
	CD630_21620	CD630_26990
	CD630_21660	CD630_27020
	CD630_21670	CD630_27170
	CD630_21680	CD630_27270
	CD630_21740	CD630_27310
	CD630_21770	CD630_27350
	CD630_21810	CD630_27380
	CD630_21840	CD630_27490
	CD630_21950	CD630_27520
	CD630_22040	CD630_27560
	CD630_22090	CD630_27620
	CD630_22140	CD630_27670
	CD630_22200	CD630_27680
	CD630_22210	CD630_27830
	CD630_22270	CD630_27910
	CD630_22280	CD630_27930
	CD630_22451	CD630_27991
	CD630_22470	CD630_28010
	CD630_22510	CD630_28090
	CD630_22590	CD630_28150
	CD630_22610	CD630_28280
	CD630_22640	CD630_28290
	CD630_22660	CD630_28330
	CD630_22720	CD630_28420
	CD630_22740	CD630_28450
	CD630_22780	CD630_28480
	CD630_22950	CD630_28540
	CD630_22990	CD630_28550
	CD630_22991	CD630_28580
	CD630_23010	CD630_28620
	CD630_23011	CD630_28640
	CD630_23220	CD630_28650
	CD630_23340	CD630_28790
	CD630_23400	CD630_28840
	CD630_23440	CD630_28920
	CD630_23470	CD630_29071
	CD630_23520	CD630_29240
	CD630_23540	CD630_29660
	CD630_23550	CD630_29680
	CD630_23690	CD630_30090
	CD630_23730	CD630_30170
	CD630_23740	CD630_30190
	CD630_23750	CD630_30310
	CD630_23780	CD630_30320
	CD630_23790	CD630_30330
	CD630_23810	CD630_30370
	CD630_23820	CD630_30410
	CD630_23861	CD630_30540
	CD630_23870	CD630_30720
	CD630_23900	CD630_30730
	CD630_23950	CD630_30890
	CD630_23960	CD630_30930
	CD630_23980	CD630_30960
	CD630_24030	CD630_31300
	CD630_24060	CD630_31380
	CD630_24090	CD630_31450
	CD630_24100	CD630_31470
	CD630_24120	CD630_31640
	CD630_24260	CD630_31670
	CD630_24291	CD630_31691
	CD630_24300	CD630_31700
	CD630_24330	CD630_31740
	CD630_24350	CD630_31750
	CD630_24351	CD630_31910
	CD630_24400	CD630_32040
	CD630_24440	CD630_32080
	CD630_24450	CD630_32201
	CD630_24461	CD630_32220
	CD630_24500	CD630_32280
	CD630_24590	CD630_32310
	CD630_24591	CD630_32320
	CD630_24600	CD630_32350
	CD630_24610	CD630_32440
	CD630_24630	CD630_32450
	CD630_24650	CD630_32500
	CD630_24700	CD630_32520
	CD630_24730	CD630_32540
	CD630_24790	CD630_32550
	CD630_24800	CD630_32590
	CD630_24820	CD630_32690
	CD630_24910	CD630_32700
	CD630_24960	CD630_32710
	CD630_25020	CD630_32730
	CD630_25040	CD630_32830
	CD630_25090	CD630_32840
	CD630_25120	CD630_32890
	CD630_25130	CD630_32900
	CD630_25140	CD630_32980
	CD630_25171	CD630_33020
	CD630_25180	CD630_33050
	CD630_25200	CD630_33060
	CD630_25210	CD630_33090
	CD630_25220	CD630_33170
	CD630_25240	CD630_33270
	CD630_25270	CD630_33300
	CD630_25320	CD630_33331
	CD630_25360	CD630_33420
	CD630_25390	CD630_33550
	CD630_25400	CD630_33640
	CD630_25500	CD630_33660
	CD630_25530	CD630_33750
	CD630_25590	CD630_33770
	CD630_25621	CD630_33950
	CD630_25622	CD630_33960
	CD630_25640	CD630_33980
	CD630_25730	CD630_34020
	CD630_25760	CD630_34391
	CD630_25770	CD630_34392
	CD630_25930	CD630_34470
	CD630_26000	CD630_34550
	CD630_26130	CD630_34570
	CD630_26140	CD630_34580
	CD630_26160	CD630_34600
	CD630_26270	CD630_34640
	CD630_26290	CD630_34720
	CD630_26360	CD630_34730
	CD630_26410	CD630_34760
	CD630_26420	CD630_34770
	CD630_26460	CD630_34830
	CD630_26470	CD630_34860
	CD630_26520	CD630_34900
	CD630_26550	CD630_34940
	CD630_26610	CD630_34960
	CD630_26640	CD630_34990
	CD630_26680	CD630_35120
	CD630_26710	CD630_35160
	CD630_26830	CD630_35180
	CD630_26860	CD630_35210
	CD630_26871	CD630_35220
	CD630_26880	CD630_35240
	CD630_26910	CD630_35420
	CD630_26930	CD630_35580
	CD630_26970	CD630_35600
	CD630_26990	CD630_35640
	CD630_27020	CD630_35670
	CD630_27170	CD630_35680
	CD630_27200	CD630_35690
	CD630_27270	CD630_35780
	CD630_27310	CD630_35800
	CD630_27350	CD630_35810
	CD630_27380	CD630_35880
	CD630_27490	CD630_35890
	CD630_27520	CD630_35950
	CD630_27560	CD630_36000
	CD630_27600	CD630_36051
	CD630_27620	CD630_36090
	CD630_27670	CD630_36100
	CD630_27680	CD630_36130
	CD630_27830	CD630_36180
	CD630_27860	CD630_36190
	CD630_27910	CD630_36250
	CD630_27930	CD630_36380
	CD630_27950	CD630_36510
	CD630_27991	CD630_36550
	CD630_28010	CD630_36610
	CD630_28020	CD630_36630
	CD630_28090	CD630_36640
	CD630_28150	CD630_36670
	CD630_28280	CD630_36680
	CD630_28290	CD630_36690
	CD630_28320	CD630_36720
	CD630_28330	CD630_36800
	CD630_28420	CD630_r0190
	CD630_28450	CD630_r0220
	CD630_28480	CD630_r0260
	CD630_28540	CD630_s0010
	CD630_28550	CD630_s0060
	CD630_28580	CD630_s0160
	CD630_28620	CD630_s0190
	CD630_28640	CD630_s0220
	CD630_28650	CD630_s0230
	CD630_28790	CD630_s0300
	CD630_28840	CD630_s0330
	CD630_28890	CD630_s0340
	CD630_28920	CD630_s0360
	CD630_29071	CD630_s0370
	CD630_29240	CD630_s0390
	CD630_295215	CD630_s0400
	CD630_295216	CD630_s0420
	CD630_295217	CD630_s0430
	CD630_29560	CD630_s0440
	CD630_29630	CD630_s0450
	CD630_29660	CD630_s0460
	CD630_29680	CD630_s0470
	CD630_30090	CD630_s0480
	CD630_30170	CD630_s0490
	CD630_30190	CD630_s0510
	CD630_30300	CD630_s0560
	CD630_30310	CD630_s0570
	CD630_30320	CD630_s0610
	CD630_30330	CD630_s0660
	CD630_30370	CD630_SQ1005
	CD630_30410	CD630_SQ403
	CD630_30430	CD630_t0010
	CD630_30540	CD630_t0080
	CD630_30640	CD630_t0410
	CD630_30720	CD630_t0830
	CD630_30730	CD630_t0870
	CD630_30890
	CD630_30930
	CD630_30960
	CD630_31300
	CD630_31370
	CD630_31380
	CD630_31450
	CD630_31470
	CD630_31580
	CD630_31640
	CD630_31670
	CD630_31691
	CD630_31700
	CD630_31740
	CD630_31750
	CD630_31870
	CD630_31880
	CD630_31910
	CD630_32040
	CD630_32080
	CD630_32190
	CD630_32201
	CD630_32220
	CD630_32250
	CD630_32280
	CD630_32290
	CD630_32310
	CD630_32320
	CD630_32340
	CD630_32350
	CD630_32360
	CD630_32430
	CD630_32440
	CD630_32450
	CD630_32500
	CD630_32520
	CD630_32540
	CD630_32550
	CD630_32590
	CD630_32690
	CD630_32700
	CD630_32710
	CD630_32730
	CD630_32810
	CD630_32830
	CD630_32840
	CD630_32890
	CD630_32900
	CD630_32980
	CD630_32990
	CD630_33020
	CD630_33050
	CD630_33060
	CD630_33080
	CD630_33090
	CD630_33170
	CD630_33240
	CD630_33250
	CD630_33270
	CD630_33300
	CD630_33331
	CD630_33420
	CD630_33550
	CD630_33640
	CD630_33660
	CD630_33720
	CD630_33730
	CD630_33750
	CD630_33770
	CD630_33930
	CD630_33950
	CD630_33960
	CD630_33980
	CD630_34020
	CD630_34030
	CD630_34170
	CD630_34391
	CD630_34392
	CD630_34470
	CD630_34550
	CD630_34570
	CD630_34580
	CD630_34600
	CD630_34610
	CD630_34640
	CD630_34720
	CD630_34730
	CD630_34760
	CD630_34770
	CD630_34780
	CD630_34830
	CD630_34860
	CD630_34861
	CD630_34900
	CD630_34940
	CD630_34960
	CD630_34970
	CD630_34980
	CD630_34990
	CD630_35120
	CD630_35140
	CD630_35160
	CD630_35180
	CD630_35210
	CD630_35220
	CD630_35240
	CD630_35420
	CD630_35530
	CD630_35580
	CD630_35600
	CD630_35620
	CD630_35640
	CD630_35660
	CD630_35670
	CD630_35680
	CD630_35690
	CD630_35700
	CD630_35780
	CD630_35800
	CD630_35810
	CD630_35880
	CD630_35890
	CD630_35950
	CD630_36000
	CD630_36051
	CD630_36080
	CD630_36090
	CD630_36100
	CD630_361101
	CD630_36130
	CD630_36160
	CD630_36180
	CD630_36190
	CD630_36250
	CD630_36380
	CD630_36510
	CD630_36550
	CD630_36610
	CD630_36630
	CD630_36640
	CD630_36670
	CD630_36680
	CD630_36690
	CD630_36720
	CD630_36750
	CD630_36781
	CD630_36800
	CD630_Cdi1_10
	CD630_Cdi2_4
	CD630_n00520
	CD630_n00650
	CD630_n00660
	CD630_n00860
	CD630_r0010
	CD630_r0040
	CD630_r0060
	CD630_r0070
	CD630_r0090
	CD630_r0100
	CD630_r0120
	CD630_r0130
	CD630_r0150
	CD630_r0160
	CD630_r0190
	CD630_r0210
	CD630_r0220
	CD630_r0260
	CD630_r0290
	CD630_r0320
	CD630_RNA_14
	CD630_s0010
	CD630_s0020
	CD630_s0060
	CD630_s0160
	CD630_s0180
	CD630_s0190
	CD630_s0220
	CD630_s0230
	CD630_s0250
	CD630_s0270
	CD630_s0300
	CD630_s0330
	CD630_s0340
	CD630_s0360
	CD630_s0370
	CD630_s0390
	CD630_s0400
	CD630_s0420
	CD630_s0430
	CD630_s0440
	CD630_s0450
	CD630_s0460
	CD630_s0470
	CD630_s0480
	CD630_s0490
	CD630_s0510
	CD630_s0520
	CD630_s0560
	CD630_s0570
	CD630_s0591
	CD630_s0610
	CD630_s0631
	CD630_s0660
	CD630_SQ1005
	CD630_SQ403
	CD630_t0010
	CD630_t0080
	CD630_t0200
	CD630_t0280
	CD630_t0340
	CD630_t0410
	CD630_t0460
	CD630_t0530
	CD630_t0580
	CD630_t0590
	CD630_t0650
	CD630_t0660
	CD630_t0690
	CD630_t0740
	CD630_t0790
	CD630_t0800
	CD630_t0830
	CD630_t0870
