# Supplementary material for: Genome-Wide Transcription Start Site Mapping and Promoter Assignments to a Sigma Factor in the Human Enteropathogen Clostridioides difficile
Source: PubMed Central journal article supplement (PMC7438776; doi:10.3389/fmicb.2020.01939), 2020-08-13
Supplement: Table_1.pdf [file Table_1.pdf]

Table S1. Strains and plasmids used in this study

| Strains                    | Genotype                                                                                                                                                                                                                                                                                                                                           | Origin             |
|----------------------------|----------------------------------------------------------------------------------------------------------------------------------------------------------------------------------------------------------------------------------------------------------------------------------------------------------------------------------------------------|--------------------|
| <i>E. coli</i>             |                                                                                                                                                                                                                                                                                                                                                    |                    |
| TOP 10                     | F <sup>-</sup> <i>mcrA</i> D( <i>mrr-hsdRMS-mcrBC</i> ) f80 <i>lacZ</i> DM15 D <i>lacX</i> 74<br><i>deoR</i> , <i>recA1</i> <i>araD</i> 139 D( <i>ara-leu</i> )7697 <i>galK</i> <i>rpsL</i> (Str <sup>R</sup> )<br><i>endA1</i> <i>nupG</i>                                                                                                        | Invitrogen         |
| HB101 (RP4)                | <i>supE44</i> <i>aa14</i> <i>galK2</i> <i>lacY1</i> Δ( <i>gpt-proA</i> ) 62 <i>rpsL</i> 20<br>(Str <sup>R</sup> ) <i>xyl-5</i> <i>mtl-1</i> <i>recA13</i> Δ( <i>mcrC-mrr</i> ) <i>hsdS</i> <sub>B</sub> (r <sub>B</sub> <sup>-</sup> m <sub>B</sub> <sup>-</sup> )<br>RP4 (Tra <sup>+</sup> IncP Ap <sup>R</sup> Km <sup>R</sup> Tc <sup>R</sup> ) | laboratory stock   |
| <b><i>C. difficile</i></b> |                                                                                                                                                                                                                                                                                                                                                    |                    |
| 630 Δ <i>erm</i>           | 630Δ <i>erm</i>                                                                                                                                                                                                                                                                                                                                    | laboratory stock   |
| CDIP217                    | 630Δ <i>erm</i> <i>sigL::erm</i>                                                                                                                                                                                                                                                                                                                   | Dubois et al, 2016 |
| CDIP342                    | 630Δ <i>erm</i> <i>sigL::erm</i> pMTL84121- <i>sigL</i>                                                                                                                                                                                                                                                                                            | Dubois et al, 2016 |
